# Supplementary material for: Genome-Wide Association Analysis of Freezing Tolerance and Winter Hardiness in Winter Wheat of Nordic Origin
Source: Plants (Basel). 2023 Nov 29;12(23):4014. doi: 10.3390/plants12234014 (PMC10708462; doi:10.3390/plants12234014)
Supplement: Supplementary file 1 [file plants-12-04014-s001.zip]

Archive with 7 entries (7 files):
- Table S6.xlsx
- Table S5.xlsx
- Table S4.xlsx
- Table S3.xlsx
- Table S2.xlsx
- Table S1.xlsx
- GWAS_freezing_tolerance_wheat_supplementary_material_v3.pdf
