# Supplementary material for: Genome-Wide Association Analysis of Freezing Tolerance and Winter Hardiness in Winter Wheat of Nordic Origin
Source: Plants (Basel). 2023 Nov 29;12(23):4014. doi: 10.3390/plants12234014 (PMC10708462; doi:10.3390/plants12234014)
Supplement: Supplementary file 1 [file plants-12-04014-s001.zip › Table S1.xlsx]

## Sheet: Supplementary Table 1
Table S1. List of 160 winter wheat cultivars and landraces of Nordic origin, used in this study. LT: less tolerant; IM: intermediate; MT: more tolerant; CV: cultivar; L: landrace; NA: unknown
																		BobWhite_c23903_443	BobWhite_c28133_87	Excalibur_c2598_2052	Kukri_c14902_1112	RAC875_c16644_491	BS00074926_51	Excalibur_c43822_370	wsnp_Ex_c607_1204908	BobWhite_c6055_185	CAP7_c3697_87	Kukri_c57491_156	BS00110072_51	Tdurum_contig47476_528	Kukri_rep_c85536_598	RFL_Contig3621_1157	Tdurum_contig47476_495	wsnp_BF202806B_Ta_2_1	Kukri_c54078_114	RAC875_c88279_291	BS00030430_51	Tdurum_contig50731_961	wsnp_JD_c10233_10936535	BobWhite_c18566_106
NordGen ID	NordgenIdNumberOnly	Lantmännen ID 2018	Name	Release year	Year group	Level of freezing tolerance	Country of origin	Culton type	Norway field trials?	OV_Ed09	OV_Ed10	OV_Ed11	OV_Vb09	OV_Vb10	MeanLT50_2021	MeanLT50_2022	MeanLT50_average	T/C	T/C	A/G	A/G	G/A	T/C	C/T	T/C	G/T	C/T	T/C	A/C	C/T	T/C	G/A	G/A	A/G	G/T	T/C	G/A	A/C	C/A	C/A
NGB344	344	593090	Vakka	1959	1941-1980	MT	Finland	CV	FALSE	NA	NA	NA	NA	NA	-14.62	-14.05	-14.34	C	C	A	A	G	C	C	T	G	T	C	C	C	T	G	G	A	G	C	G	A	C	A
NGB348	348	593092	Jyvä	1965	1941-1980	MT	Finland	CV	TRUE	66.7	50	66.9	40	66.9	-14.26	-14.24	-14.25	C	N	A	A	G	C	T	T	G	T	C	C	T	C	A	A	A	T	T	G	A	C	C
NGB334	334	593088	Linna	1965	1941-1980	MT	Finland	CV	FALSE	NA	NA	NA	NA	NA	-14.27	-14.08	-14.18	C	C	A	A	G	T	T	T	G	T	C	C	T	C	A	A	A	G	T	G	C	C	C
NGB23171	23171	593058	Istäsuomalainen	NA	NA	MT	Finland	L	FALSE	NA	NA	NA	NA	NA	-14.2	-14.02	-14.11	C	T	A	A	G	T	N	T	G	T	Y	M	Y	Y	G	R	A	G	C	G	C	M	A
NGB13445	13445	593018	Ångermanland	NA	NA	MT	Sweden	L	FALSE	NA	NA	NA	NA	NA	-14.7	-13.64	-14.06	C	T	A	A	G	T	C	T	G	C	T	A	C	T	G	G	A	G	C	A	C	M	A
NGB6722	6722	593140	Pärl II	1946	1941-1980	MT	Sweden	CV	TRUE	0	51.7	49.9	56.7	31.4	-14.49	-13.61	-14.05	C	T	A	A	G	C	C	T	G	C	T	A	C	T	G	G	A	G	T	A	C	C	A
NGB23170	23170	593057	Kuikka	NA	NA	MT	Finland	L	FALSE	NA	NA	NA	NA	NA	-14.21	-13.82	-14.02	C	T	A	A	G	T	C	T	G	C	Y	A	C	T	G	G	A	G	T	R	A	C	C
NGB21864	21864	593054	Otso	1989	1981-2012	MT	Finland	CV	FALSE	NA	NA	NA	NA	NA	-13.79	-14.11	-13.95	T	C	A	G	G	T	C	T	T	C	C	A	C	T	G	G	A	T	T	G	C	C	C
NGB8968	8968	593176	Haukiala Pirola	NA	NA	MT	Finland	L	TRUE	36.7	8.3	13.3	36.7	79.9	-14.04	-13.62	-13.83	C	C	A	A	G	T	C	T	K	T	C	A	C	T	G	G	A	T	C	G	A	C	C
NGB6773	6773	593150	Hankkijan Ilves	1984	1981-2012	MT	Finland	CV	TRUE	8.3	66.7	53.4	100	76.1	-14.5	-13.1	-13.8	C	C	A	A	G	C	C	T	G	C	C	A	C	T	G	G	A	G	C	G	C	N	A
NGB9020	9020	593184	Varma Tammisto	1933	1896-1940	MT	Finland	CV	TRUE	36.7	56.7	42.1	100	83.3	-13.92	-13.68	-13.8	C	C	A	A	G	Y	T	T	G	T	C	M	T	C	A	A	A	G	T	G	C	A	A
NGB8198	8198	593169	Lantvete från Värmland	NA	NA	MT	Sweden	CV	TRUE	36.7	70	68.1	90	64	-13.84	-13.73	-13.79	Y	C	A	A	G	T	T	T	G	N	C	A	T	C	A	A	G	G	C	G	C	C	C
NGB6699	6699	593118	Renodlat sammetsvete	1910	1896-1940	MT	Sweden	CV	TRUE	16.7	51.7	66.1	26.7	43.4	-14.27	-13.29	-13.78	C	T	A	A	G	T	C	T	G	C	T	A	C	T	G	G	R	G	C	A	M	C	C
NGB18629	18629	593049	Olympia	1941	1941-1980	MT	Finland	CV	FALSE	NA	NA	NA	NA	NA	-13.98	-13.54	-13.76	C	C	A	A	G	T	C	T	G	T	C	A	C	T	G	G	A	T	C	G	A	C	C
NGB8957	8957	593175	Enger	NA	NA	MT	Norway	L	TRUE	0	43.3	66.4	15	29	-13.94	-13.45	-13.7	C	T	A	A	G	C	C	T	G	C	C	A	C	T	G	G	G	G	C	G	C	C	C
NGB6724	6724	593142	Robur	1949	1941-1980	MT	Sweden	CV	TRUE	6.7	30	34.2	41.7	73.5	-14.32	-13.04	-13.68	N	T	A	A	G	Y	C	T	G	Y	T	A	C	T	G	G	A	G	T	R	M	C	C
NGB6706	6706	593125	Birgitta	1922	1896-1940	MT	Sweden	CV	FALSE	NA	NA	NA	NA	NA	-13.51	-13.76	-13.63	T	T	R	A	G	C	C	T	G	C	T	A	C	T	G	G	A	G	T	R	A	C	C
NGB6705	6705	593124	Riddar	1922	1896-1940	MT	Sweden	CV	FALSE	NA	NA	NA	NA	NA	-13.65	-13.53	-13.59	T	T	G	A	G	N	C	T	G	C	T	A	C	T	G	G	A	G	T	G	A	C	C
NGB8199	8199	593170	Gammalt svenskt lantvete	NA	NA	MT	Sweden	CV	TRUE	35	100	50.2	56.7	73.3	-13.34	-13.79	-13.57	C	T	A	A	G	T	C	T	G	T	T	A	C	T	G	G	A	G	C	A	C	N	A
NGB13446	13446	593019	Tystofte Smaahvede	1900	1896-1940	MT	Denmark	CV	FALSE	NA	NA	NA	NA	NA	-13.78	-13.28	-13.53	C	T	A	A	G	C	C	T	G	C	T	A	C	T	G	G	A	G	T	G	A	C	A
NGB13	13	593013	Virtus	1945	1941-1980	MT	Sweden	CV	TRUE	16.7	38.3	19.9	26.7	55.1	-13.56	-13.49	-13.52	Y	T	A	R	G	T	T	T	G	C	C	A	N	C	A	R	G	G	T	G	N	C	C
NGB13444	13444	593017	NGB13444	NA	NA	MT	NA	NA	FALSE	NA	NA	NA	NA	NA	-13.73	-13.35	-13.5	T	T	A	G	G	C	C	T	G	C	T	M	C	T	G	G	A	T	T	G	M	C	A
NGB14286	14286	593029	S-5	NA	NA	MT	Sweden	L	FALSE	NA	NA	NA	NA	NA	-13.69	-13.26	-13.43	T	C	A	G	G	C	C	C	G	C	T	A	C	T	G	G	G	G	C	G	C	C	C
NGB17137	17137	593045	Väinö	NA	NA	MT	Finland	CV	FALSE	NA	NA	NA	NA	NA	-13.49	-13.32	-13.4	C	C	A	G	A	T	T	T	G	C	C	A	T	C	A	A	G	G	C	R	A	M	C
NGB6719	6719	593137	Borg	1943	1941-1980	MT	Sweden	CV	FALSE	NA	NA	NA	NA	NA	-13.76	-12.93	-13.34	T	T	A	A	G	T	C	T	G	C	T	A	C	T	G	G	A	G	C	A	A	C	A
NGB8999	8999	593178	Sammets	1910	1896-1940	MT	Sweden	CV	FALSE	NA	NA	NA	NA	NA	-12.91	-13.75	-13.33	C	T	A	A	G	T	C	T	G	Y	C	A	C	T	G	G	A	G	C	G	C	M	A
NGB8946	8946	593174	Brødtorp Pajo	NA	NA	MT	Denmark	L	TRUE	16.7	63.3	39.9	70	98	-13.31	-13.27	-13.29	C	T	A	A	G	C	N	T	G	C	Y	A	Y	Y	G	G	N	G	C	G	N	M	N
NGB17135	17135	593044	Sampo	1933	1896-1940	MT	Finland	CV	FALSE	NA	NA	NA	NA	NA	-13.4	-13.05	-13.22	C	T	A	G	G	T	C	T	G	T	T	A	C	T	G	G	A	G	T	G	C	N	M
NGB9122	9122	593193	Anja	1980	1941-1980	MT	Denmark	CV	TRUE	1.7	76.7	29.5	46.7	56.8	-13.22	-13.21	-13.21	T	T	A	G	G	Y	C	T	G	C	T	A	C	T	G	G	A	G	T	G	N	C	C
NGB23350	23350	593064	Junker	1988	1981-2012	MT	Sweden	CV	FALSE	NA	NA	NA	NA	NA	-13.48	-12.91	-13.2	T	T	A	A	G	T	C	T	G	C	T	A	C	T	G	G	A	G	T	G	C	C	A
NGB4783	4783	593097	Storvik Sjundeå	NA	NA	MT	Finland	L	TRUE	40	1.7	16.3	43.3	50.2	-13.15	-13.16	-13.16	C	C	A	A	G	T	C	T	T	Y	C	A	C	T	G	G	A	T	C	G	A	C	C
NGB343	343	593089	Nisu	1966	1941-1980	IM	Finland	CV	FALSE	NA	NA	NA	NA	NA	-13.46	-12.64	-13.05	C	T	A	A	G	C	T	T	G	T	C	C	T	C	A	A	A	T	T	G	A	C	C
NGB6718	6718	593136	Gluten	1939	1896-1940	IM	Sweden	CV	FALSE	NA	NA	NA	NA	NA	-13.55	-12.55	-13.05	T	T	A	A	G	T	T	T	G	C	C	A	T	C	A	A	A	G	T	A	A	M	A
NGB15	15	593030	Eroica II	1951	1941-1980	IM	Sweden	CV	TRUE	35	60	6.1	15	56.5	-13.55	-12.53	-13.04	T	T	A	A	G	T	C	C	G	C	T	A	C	T	G	G	A	G	T	G	C	C	C
NGB14118	14118	593028	Rudolf Rubin	1921	1896-1940	IM	Sweden	CV	TRUE	11.7	26.7	69.8	8.3	36.6	-13.46	-12.61	-13.04	T	T	A	A	G	T	C	T	G	C	T	A	C	T	G	G	A	G	T	G	C	C	A
NGB23356	23356	593068	Skjaldar	1976	1941-1980	IM	Norway	CV	FALSE	NA	NA	NA	NA	NA	-13.71	-12.36	-13.04	T	T	A	A	G	C	C	T	G	C	C	A	C	T	G	G	A	G	T	G	C	C	C
NGB347	347	593091	Aura	1976	1941-1980	IM	Finland	CV	FALSE	NA	NA	NA	NA	NA	-12.65	-13.41	-13.03	C	C	A	G	G	T	T	T	G	T	C	C	T	C	A	A	G	G	T	G	C	C	A
NGB9057	9057	593185	Hallandsvete	NA	NA	IM	Sweden	L	FALSE	NA	NA	NA	NA	NA	-13.44	-12.55	-12.99	T	T	A	A	G	C	C	T	G	C	T	A	C	T	G	G	A	G	T	A	A	C	A
NGB14115	14115	593025	Mjölner	1996	1981-2012	IM	Sweden	CV	FALSE	NA	NA	NA	NA	NA	-13.02	-12.95	-12.99	C	T	A	A	G	T	C	T	G	C	C	A	C	T	G	G	G	G	T	G	C	C	C
NGB14117	14117	593027	Stava	1995	1981-2012	IM	Sweden	CV	TRUE	33.3	50	33.8	50	73	-13.62	-12.22	-12.92	C	T	A	A	G	T	C	C	G	C	T	A	C	T	G	G	A	G	T	G	C	A	A
NGB9952	9952	593196	Tjelvar	1984	1981-2012	IM	Sweden	CV	FALSE	NA	NA	NA	NA	NA	-13.28	-12.43	-12.86	T	T	A	A	G	T	C	C	T	C	T	A	C	T	G	G	A	G	T	G	C	C	A
NGB22	22	593055	Starke II	1968	1941-1980	IM	Sweden	CV	TRUE	10	5	21.2	13.3	33.3	-13.14	-12.54	-12.84	T	T	A	A	G	T	C	T	G	C	T	A	C	T	G	G	A	G	T	G	C	C	A
NGB12	12	593008	Eroica	1943	1941-1980	IM	Sweden	CV	TRUE	0	0	24.1	10	89.7	-13.17	-12.44	-12.8	T	T	A	A	G	T	C	T	G	C	T	A	C	T	G	G	A	G	T	G	A	C	N
NGB13442	13442	593016	NGB13442	NA	NA	IM	NA	NA	FALSE	NA	NA	NA	NA	NA	-13.1	-12.47	-12.79	C	T	G	A	G	T	C	T	G	C	C	A	C	T	G	G	G	T	C	G	C	C	C
NGB16	16	593036	Banco	1953	1941-1980	IM	Sweden	CV	FALSE	NA	NA	NA	NA	NA	-12.79	-12.7	-12.75	T	T	A	A	G	T	C	N	G	C	T	A	C	T	G	G	A	G	T	G	C	C	M
NGB13479	13479	593020	Stava	1995	1981-2012	IM	Sweden	CV	FALSE	NA	NA	NA	NA	NA	-12.78	-12.72	-12.75	C	T	A	A	G	T	C	C	G	C	T	A	C	T	G	G	A	G	T	G	C	M	A
NGB6727	6727	593145	Ölve	1959	1941-1980	IM	Sweden	CV	TRUE	0	15	20.3	25	50	-13.37	-12.08	-12.73	T	T	A	A	G	N	C	T	G	C	T	A	C	T	G	G	A	G	T	G	C	C	C
NGB4494	4494	593094	Borstvete från Gotland	NA	NA	IM	Sweden	L	TRUE	1.7	13.3	19.2	26.7	50.2	-13.17	-12.26	-12.72	T	T	A	A	G	T	C	T	G	C	C	A	C	T	G	G	G	T	T	G	A	C	C
NGB8	8	593165	Ergo	1934	1896-1940	IM	Sweden	CV	TRUE	5	16.7	39.4	30	43.3	-12.64	-12.77	-12.71	N	T	A	A	G	T	C	T	G	C	T	A	C	T	G	G	A	G	T	G	N	C	C
NGB6692	6692	593111	Lantvete från Uppsala	NA	NA	IM	Sweden	L	TRUE	35	61.7	49.5	70	51.9	-12.86	-12.54	-12.7	N	T	A	A	G	Y	Y	T	G	Y	T	M	N	Y	G	G	N	G	C	G	C	N	C
NGB6726	6726	593144	Diana	1957	1941-1980	IM	Sweden	CV	FALSE	NA	NA	NA	NA	NA	-13.4	-11.95	-12.68	C	T	A	G	G	T	C	T	G	C	C	A	C	T	G	G	G	G	T	R	M	M	C
NGB7034	7034	593153	Mendel	1940	1896-1940	IM	Sweden	CV	FALSE	NA	NA	NA	NA	NA	-13.5	-11.81	-12.66	T	T	A	R	G	T	C	T	G	C	T	A	C	T	G	G	A	G	T	G	A	C	C
NGB2434	2434	593081	Folke	1981	1981-2012	IM	Sweden	CV	TRUE	21.7	43.3	32.4	56.7	99.7	-12.59	-12.66	-12.63	T	T	A	A	G	T	C	T	G	C	T	A	C	T	G	G	A	G	T	G	C	M	A
NGB14	14	593023	Aros	1947	1941-1980	IM	Sweden	CV	TRUE	66.7	68.3	79.5	18.3	53.5	-13.22	-12.02	-12.62	T	T	A	A	G	T	T	T	T	C	T	A	T	C	A	A	A	G	T	G	C	C	A
NGB6710	6710	593129	Sol III	1929	1896-1940	IM	Sweden	CV	FALSE	NA	NA	NA	NA	NA	-13.42	-11.82	-12.62	T	T	G	A	G	C	C	T	G	C	T	A	C	T	G	G	A	G	T	A	A	C	C
NGB14114	14114	593024	Gunbo	1997	1981-2012	IM	Sweden	CV	FALSE	NA	NA	NA	NA	NA	-12.83	-12.35	-12.59	T	T	A	A	G	T	C	T	G	C	T	A	C	T	G	G	A	G	N	G	C	C	A
NGB6720	6720	593138	Skandia III B	1955	1941-1980	IM	Sweden	CV	FALSE	NA	NA	NA	NA	NA	-13.14	-12.01	-12.58	T	T	G	A	G	T	C	T	G	C	T	A	C	T	G	G	A	G	T	G	A	C	C
NGB7483	7483	593163	Sleipner	1988	1981-2012	IM	Sweden	CV	TRUE	0	3.3	21.2	66.7	60.6	-12.82	-12.33	-12.58	T	T	A	G	G	T	C	T	T	N	T	A	C	T	G	G	G	T	T	G	N	A	N
NGB7484	7484	593164	Rurik	1986	1981-2012	IM	Sweden	CV	FALSE	NA	NA	NA	NA	NA	-12.75	-12.41	-12.58	T	T	A	G	G	T	C	T	T	C	T	A	C	T	G	G	A	T	T	G	C	C	C
NGB19	19	593050	Trond	1960	1941-1980	IM	Sweden	CV	TRUE	5	33.3	27.6	23.3	69.6	-12.41	-12.63	-12.52	T	T	A	G	G	T	C	T	G	C	T	A	C	T	G	G	A	G	T	G	C	C	C
NGB23359	23359	593071	Ure	1991	1981-2012	IM	Denmark	CV	FALSE	NA	NA	NA	NA	NA	-12.63	-12.4	-12.51	T	T	A	G	G	C	C	T	G	C	T	A	C	T	G	G	A	T	T	G	A	C	C
NGB24	24	593080	Walde	1945	1941-1980	IM	Sweden	CV	TRUE	1.7	46.7	38.9	40	63.6	-12.46	-12.52	-12.49	T	T	A	A	G	T	C	T	G	C	T	A	C	T	G	G	A	G	T	G	C	C	A
NGB14116	14116	593026	Rental	1993	1981-2012	IM	Sweden	CV	FALSE	NA	NA	NA	NA	NA	-13.1	-11.86	-12.48	T	T	A	A	G	T	C	T	G	C	T	A	C	T	G	G	A	G	T	G	C	C	C
NGB25	25	593083	Sture	1975	1941-1980	IM	Sweden	CV	FALSE	NA	NA	NA	NA	NA	-12.73	-12.2	-12.47	T	T	A	G	G	T	C	T	G	C	T	A	C	T	G	G	A	G	T	G	C	C	A
NGB6716	6716	593134	Gyllen II	1938	1896-1940	IM	Sweden	CV	TRUE	10	46.7	35.6	43.3	90.3	-13.09	-11.75	-12.42	T	T	A	G	G	T	C	T	G	C	T	A	C	T	G	G	A	G	T	A	A	C	C
NGB4	4	593093	Ankar	1928	1896-1940	IM	Sweden	CV	TRUE	0	46.7	25.9	26.7	66.5	-12.7	-12.09	-12.4	T	T	A	G	G	T	C	T	G	C	Y	A	C	T	G	G	A	G	T	G	C	C	C
NGB10	10	593003	Äring II	1936	1896-1940	IM	Sweden	CV	FALSE	NA	NA	NA	NA	NA	-12.98	-11.81	-12.4	T	T	A	A	G	T	C	T	T	C	T	A	C	T	G	G	A	G	T	G	C	C	C
NGB6723	6723	593141	Odin	1949	1941-1980	IM	Sweden	CV	TRUE	3.3	3.3	1.7	100	59.1	-13.14	-11.65	-12.4	T	T	A	A	G	T	C	T	G	C	C	A	C	T	G	G	A	G	T	G	A	N	A
NGB9118	9118	593191	Nana	1975	1941-1980	IM	Denmark	CV	TRUE	3.3	43.3	33	10	99.9	-12.49	-12.29	-12.39	T	T	A	G	G	T	C	T	T	C	T	A	C	T	G	G	A	G	T	G	C	C	C
NGB2	2	593051	Standard	1921	1896-1940	IM	Sweden	CV	FALSE	NA	NA	NA	NA	NA	-13.11	-11.63	-12.37	T	T	A	G	G	T	C	T	G	C	T	A	C	T	G	G	A	G	T	G	C	C	C
NGB20	20	593052	Thor	1961	1941-1980	IM	Sweden	CV	TRUE	0	43.3	29.5	25	60.9	-12.65	-12.08	-12.37	T	T	A	G	G	T	C	T	G	C	T	A	C	T	G	G	A	G	T	G	N	C	C
NGB6695	6695	593114	Bore	1902	1896-1940	IM	Sweden	CV	TRUE	21.7	16.7	13.9	25	66.5	-13.02	-11.72	-12.37	Y	T	A	A	G	N	Y	T	K	C	Y	A	C	Y	G	G	R	G	N	R	M	C	M
NGB17142	17142	593047	Kökar	NA	NA	IM	Finland	L	FALSE	NA	NA	NA	NA	NA	-12.76	-11.99	-12.37	T	T	A	A	G	Y	C	T	G	C	Y	A	C	T	G	G	A	G	T	G	C	C	A
NGB1	1	593002	Iduna	1911	1896-1940	IM	Sweden	CV	TRUE	1.7	26.7	56.9	30	41	-12.49	-12.22	-12.36	T	T	A	A	G	T	C	T	G	C	T	A	C	T	G	G	A	G	T	G	C	C	C
NGB17	17	593043	Ertus	1953	1941-1980	IM	Sweden	CV	TRUE	0	61.7	18.1	1.7	51.1	-13.01	-11.67	-12.34	T	T	A	A	G	T	C	T	G	C	Y	A	Y	Y	G	N	A	G	T	G	C	M	C
NGB2435	2435	593082	Holger	1981	1981-2012	IM	Sweden	CV	TRUE	0	36.7	26.1	20	13.9	-12.32	-12.36	-12.34	C	T	A	A	G	T	C	T	G	C	T	A	C	T	G	G	A	G	T	G	C	M	A
NGB7	7	593151	Äring	1932	1896-1940	IM	Sweden	CV	TRUE	6.7	73.3	19.7	3.3	74.1	-12.86	-11.81	-12.33	T	T	A	A	G	T	C	T	G	C	T	A	C	T	G	G	A	G	T	G	C	C	C
NGB7195	7195	593161	Øtofte L.56	1956	1941-1980	IM	Denmark	CV	FALSE	NA	NA	NA	NA	NA	-12.58	-12.07	-12.33	T	T	A	A	G	T	C	T	G	C	T	A	C	T	G	G	A	G	T	G	A	A	C
NGB17141	17141	593046	Pitkävihneinen maatiainen	NA	NA	IM	Finland	L	FALSE	NA	NA	NA	NA	NA	-12.96	-11.7	-12.33	C	T	A	G	A	C	C	T	T	C	C	A	C	T	G	G	A	T	T	A	A	A	A
NGB6721	6721	593139	Hansa Svalöf	1945	1941-1980	IM	Sweden	CV	FALSE	NA	NA	NA	NA	NA	-13.13	-11.5	-12.31	T	T	A	A	G	C	C	T	G	C	T	A	C	T	G	G	A	G	T	G	A	C	C
NGB31181	31181	593086	Cymbal	2012	1981-2012	IM	Sweden	CV	FALSE	NA	NA	NA	NA	NA	-12.08	-12.53	-12.31	T	T	A	G	G	C	C	T	T	C	T	A	C	T	G	G	A	G	T	G	A	A	C
NGB13659	13659	593022	Björke	1997	1981-2012	IM	Norway	CV	TRUE	4.2	17.5	17.4	37.5	66	-12.69	-11.87	-12.28	T	T	A	A	G	C	C	T	T	C	C	A	C	T	G	G	G	T	T	G	A	C	C
NGB11425	11425	593007	Starke II-LR	NA	NA	IM	Denmark	CV	FALSE	NA	NA	NA	NA	NA	-12.62	-11.91	-12.27	T	T	A	A	G	T	C	T	G	C	T	A	C	T	G	G	A	G	T	G	C	C	A
NGB23353	23353	593067	Revelj	2000	1981-2012	IM	Sweden	CV	FALSE	NA	NA	NA	NA	NA	-12.88	-11.65	-12.27	T	T	A	G	G	C	C	C	G	C	T	A	C	T	G	G	A	G	T	G	C	C	C
NGB23360	23360	593072	Wasmo	1999	1981-2012	IM	Denmark	CV	FALSE	NA	NA	NA	NA	NA	-12.44	-12.1	-12.27	T	T	A	A	G	T	C	T	G	C	T	A	C	T	G	G	A	T	C	A	C	C	C
NGB6691	6691	593110	Lantvete från Halland	NA	NA	IM	Sweden	L	TRUE	16.7	93.3	90.6	25	98.8	-12.56	-11.96	-12.26	T	T	A	A	G	C	C	T	G	C	T	A	C	T	G	G	A	G	C	G	C	C	C
NGB6702	6702	593121	Thule II	1917	1896-1940	IM	Sweden	CV	TRUE	33.3	38.3	34.3	100	63.4	-12.4	-12.12	-12.26	Y	T	A	R	N	T	Y	T	G	C	T	M	Y	Y	G	G	A	G	N	A	A	M	A
NGB21	21	593053	Norre	1962	1941-1980	IM	Sweden	CV	TRUE	3.3	66.7	36.6	6.7	76.5	-12.94	-11.56	-12.25	T	T	A	A	G	T	C	T	G	C	T	A	C	T	G	G	A	G	T	G	C	M	A
NGB12244	12244	593012	Konge III	1966	1941-1980	IM	Denmark	CV	FALSE	NA	NA	NA	NA	NA	-12.63	-11.88	-12.25	T	T	A	N	G	T	C	T	G	C	C	A	C	T	G	G	A	G	T	G	A	C	C
NGB6730	6730	593148	Solid	1973	1941-1980	IM	Sweden	CV	FALSE	NA	NA	NA	NA	NA	-12.48	-11.97	-12.23	T	T	A	G	G	T	C	T	G	C	T	A	C	T	G	G	A	T	T	G	C	C	C
NGB15076	15076	593035	Arlo	NA	NA	IM	Denmark	CV	FALSE	NA	NA	NA	NA	NA	-12.2	-12.21	-12.21	T	T	A	G	G	T	C	T	G	C	T	A	C	T	G	G	A	T	T	G	A	C	C
NGB8937	8937	593173	Bankuta	NA	NA	IM	Sweden	CV	FALSE	NA	NA	NA	NA	NA	-12.58	-11.8	-12.19	T	T	R	R	G	T	C	T	G	C	C	A	C	T	G	G	A	G	C	N	A	A	C
NGB15075	15075	593034	Karat	2000	1981-2012	IM	Denmark	CV	FALSE	NA	NA	NA	NA	NA	-12.52	-11.83	-12.17	T	T	A	G	A	C	C	T	T	C	T	A	T	C	A	A	A	T	T	G	C	A	C
NGB23345	23345	593059	Alrö	1999	1981-2012	IM	Denmark	CV	FALSE	NA	NA	NA	NA	NA	-12.6	-11.74	-12.17	T	T	A	G	G	T	C	T	G	C	T	A	C	T	G	G	A	T	T	G	A	C	C
NGB26	26	593084	Helge	1980	1941-1980	IM	Sweden	CV	FALSE	NA	NA	NA	NA	NA	-12.35	-11.91	-12.13	N	T	A	A	G	T	C	Y	G	C	T	A	C	T	G	G	A	G	T	G	C	N	A
NGB6694	6694	593113	Extra squarehead	1900	1896-1940	IM	Sweden	CV	TRUE	0	10	23.4	35	50.3	-12.51	-11.75	-12.13	T	T	A	A	G	T	C	T	G	C	T	A	C	T	G	G	A	G	T	G	A	C	C
NGB6701	6701	593120	Sol II	1916	1896-1940	IM	Sweden	CV	TRUE	1.7	60	15.7	3.3	100	-12.34	-11.89	-12.12	T	T	R	A	R	Y	C	T	G	C	T	A	C	T	G	G	A	G	T	R	A	C	C
NGB9	9	593179	Standard II	1936	1896-1940	IM	Sweden	CV	FALSE	NA	NA	NA	NA	NA	-12.46	-11.77	-12.11	T	T	A	R	G	T	C	T	G	Y	T	A	C	T	G	G	A	G	N	G	C	C	C
NGB6715	6715	593133	Sol IV	1937	1896-1940	IM	Sweden	CV	TRUE	0	56.7	49.5	56.7	83.9	-12.43	-11.8	-12.11	T	T	G	A	G	C	C	T	G	C	T	A	C	T	G	G	A	G	T	A	A	C	C
NGB7482	7482	593162	Kosack	1984	1981-2012	IM	Sweden	CV	TRUE	0	56.7	10.1	23.3	69.9	-12.81	-11.42	-12.11	T	T	A	A	G	T	C	T	G	C	T	A	C	T	G	G	A	G	T	G	C	C	A
NGB3	3	593085	Jarl	1925	1896-1940	IM	Sweden	CV	TRUE	1.7	53.3	43.4	16.7	73.2	-12.53	-11.68	-12.1	T	T	A	A	G	T	C	T	G	C	T	A	C	T	G	G	A	G	T	G	C	C	C
NGB6	6	593106	Ankar II	1928	1896-1940	IM	Sweden	CV	TRUE	1.7	5	1.7	23.3	55.7	-11.94	-12.21	-12.08	T	T	A	A	G	T	C	T	K	C	C	A	C	T	G	G	A	G	T	G	M	C	M
NGB23	23	593056	Holme	1972	1941-1980	IM	Sweden	CV	TRUE	8.3	58.3	15.1	50	99	-12.42	-11.74	-12.08	T	T	A	A	G	T	C	T	G	C	T	A	C	T	G	G	A	G	T	G	C	A	A
NGB6731	6731	593149	Hildur	1976	1941-1980	IM	Sweden	CV	FALSE	NA	NA	NA	NA	NA	-12.74	-11.36	-12.05	T	T	A	G	G	T	C	T	G	C	T	A	C	T	G	G	A	G	T	G	C	C	A
NGB12243	12243	593011	Ergo II	1949	1941-1980	IM	Sweden	CV	FALSE	NA	NA	NA	NA	NA	-12.62	-11.47	-12.05	T	T	A	A	G	T	C	T	G	C	T	M	Y	Y	G	R	A	G	C	R	N	C	C
NGB6717	6717	593135	Skandia II	1939	1896-1940	IM	Sweden	CV	TRUE	3.3	31.7	4.6	46.7	100.2	-12.66	-11.42	-12.04	T	T	G	A	G	T	C	T	G	C	T	A	C	T	G	G	A	G	T	G	A	C	C
NGB16675	16675	593037	Saxild	2002	1981-2012	IM	Denmark	CV	FALSE	NA	NA	NA	NA	NA	-12.62	-11.42	-12.02	T	T	A	A	A	T	C	T	G	C	T	A	T	T	G	A	G	T	C	G	C	A	C
NGB6709	6709	593128	Stål	1927	1896-1940	IM	Sweden	CV	TRUE	1.7	43.3	4.4	3.3	59	-12.22	-11.74	-11.98	T	T	G	A	G	C	C	T	G	C	T	A	C	T	G	G	A	G	T	A	A	C	C
NGB23349	23349	593063	Hybris	1998	1981-2012	IM	Denmark	CV	FALSE	NA	NA	NA	NA	NA	-13.01	-10.96	-11.98	C	T	A	A	G	T	C	T	G	C	T	A	C	T	G	G	A	G	C	A	C	A	A
NGB23358	23358	593070	Terra	1994	1981-2012	IM	Denmark	CV	FALSE	NA	NA	NA	NA	NA	-12.03	-11.92	-11.98	T	T	A	G	G	T	C	T	T	C	T	A	C	T	G	G	A	T	T	G	C	C	C
NGB5153	5153	593105	Hunsballe R	1955	1941-1980	IM	Denmark	CV	TRUE	1.7	46.7	5.6	6.7	56.7	-12.34	-11.56	-11.95	T	T	G	A	G	T	C	T	G	C	T	A	C	T	G	G	A	G	T	G	A	C	C
NGB6713	6713	593131	Gyllen I	1935	1896-1940	IM	Sweden	CV	FALSE	NA	NA	NA	NA	NA	-12.22	-11.67	-11.95	T	T	A	A	G	T	C	T	G	C	T	A	C	T	G	G	A	G	T	A	A	C	C
NGB5	5	593101	Saxo	1929	1896-1940	IM	Sweden	CV	TRUE	16.7	33.3	42.9	46.7	75.6	-12.27	-11.55	-11.91	T	T	A	R	G	T	C	Y	G	C	Y	A	C	T	G	G	A	G	T	R	C	C	C
NGB15070	15070	593031	Kirsten	1997	1981-2012	IM	Denmark	CV	FALSE	NA	NA	NA	NA	NA	-11.88	-11.9	-11.89	T	T	A	G	G	C	C	T	T	C	T	A	C	T	G	G	A	T	T	G	C	C	A
NGB13576	13576	593021	Urban	1981	1981-2012	IM	Germany	CV	FALSE	NA	NA	NA	NA	NA	-11.93	-11.83	-11.88	T	T	N	G	G	T	C	T	K	C	T	A	C	T	G	G	A	G	T	A	A	C	C
NGB16679	16679	593038	Abba	2002	1981-2012	IM	Denmark	CV	FALSE	NA	NA	NA	NA	NA	-11.72	-12	-11.86	T	T	R	G	A	C	C	T	T	C	T	A	C	T	G	G	G	T	T	G	A	C	C
NGB6712	6712	593130	Bore II	1931	1896-1940	IM	Sweden	CV	FALSE	NA	NA	NA	NA	NA	-11.66	-12.03	-11.85	T	T	A	G	G	T	N	T	G	C	N	A	C	T	G	G	A	G	T	A	A	C	C
NGB8933	8933	593172	Borg Abed	1966	1941-1980	IM	Denmark	CV	TRUE	0	13.3	7.2	1.7	24	-12.03	-11.67	-11.85	T	T	A	G	G	T	C	T	G	C	T	A	C	T	G	G	A	G	T	G	A	C	C
NGB6700	6700	593119	Sol	1911	1896-1940	LT	Sweden	CV	TRUE	0	40	11.2	3.3	83.5	-11.93	-11.66	-11.8	T	T	R	G	G	T	C	T	G	C	T	A	C	T	G	G	A	G	T	R	A	C	C
NGB6383	6383	593107	Skandia	1935	1896-1940	LT	Sweden	CV	TRUE	0	80	4.8	6.7	83.3	-12.06	-11.51	-11.78	T	T	G	A	G	T	C	T	G	C	T	A	C	T	G	G	A	G	T	G	A	C	C
NGB23346	23346	593060	Dirigent	1999	1981-2012	LT	Denmark	CV	FALSE	NA	NA	NA	NA	NA	-12.02	-11.5	-11.76	T	C	G	G	A	C	C	T	T	C	T	A	C	T	G	G	A	T	T	G	C	C	C
NGB6725	6725	593143	Svale	1955	1941-1980	LT	Sweden	CV	TRUE	8.3	36.7	13.2	35	73.4	-12.71	-10.71	-11.71	T	T	G	A	G	T	C	T	G	C	T	A	C	T	G	G	A	G	T	N	C	C	C
NGB9119	9119	593192	Sarah	1976	1941-1980	LT	Denmark	CV	FALSE	NA	NA	NA	NA	NA	-11.79	-11.59	-11.69	T	T	G	G	G	T	C	T	G	C	T	A	C	T	G	G	A	T	T	G	C	C	C
NGB6696	6696	593115	Grenadier II	1907	1896-1940	LT	Sweden	CV	FALSE	NA	NA	NA	NA	NA	-12.25	-11.1	-11.68	T	T	R	A	R	N	C	T	G	Y	T	A	N	Y	G	G	A	G	T	R	A	C	C
NGB5147	5147	593102	Squarehead II	1909	1896-1940	LT	Sweden	CV	FALSE	NA	NA	NA	NA	NA	-11.88	-11.43	-11.66	T	T	A	G	A	T	C	T	G	C	T	A	C	T	G	G	A	G	T	A	A	C	C
NGB6714	6714	593132	Thule III	1936	1896-1940	LT	Sweden	CV	TRUE	11.7	43.3	66.5	70	50.3	-12.31	-11.02	-11.66	T	T	A	G	A	T	C	T	G	C	T	A	C	T	G	G	A	G	T	A	C	A	A
NGB6697	6697	593116	Extra squarehead II	1909	1896-1940	LT	Sweden	CV	FALSE	NA	NA	NA	NA	NA	-11.78	-11.49	-11.63	T	T	A	G	A	T	C	T	G	C	T	A	C	T	G	G	A	G	T	A	A	C	C
NGB6728	6728	593146	Seba	1969	1941-1980	LT	Sweden	CV	FALSE	NA	NA	NA	NA	NA	-12.3	-10.93	-11.62	T	T	G	A	G	T	C	T	G	C	T	A	C	T	G	G	A	G	T	G	A	C	C
NGB9017	9017	593182	Tystofte Stakket	1967	1941-1980	LT	Denmark	CV	TRUE	0	11.7	13.7	15	43.4	-12.31	-10.9	-11.61	T	T	G	G	G	T	C	T	G	C	T	A	C	T	G	G	A	G	T	G	A	C	C
NGB6704	6704	593123	Svea I	1924	1896-1940	LT	Sweden	CV	TRUE	18.3	93.3	43.9	23.3	83.1	-11.98	-11.23	-11.6	C	T	A	G	A	T	T	T	G	C	C	A	T	C	A	A	G	G	T	G	A	C	C
NGB23780	23780	593079	Agrestis	2001	1981-2012	LT	Denmark	CV	FALSE	NA	NA	NA	NA	NA	-11.48	-11.72	-11.6	T	T	A	G	A	C	C	T	T	C	T	A	C	T	G	G	A	T	T	A	C	C	C
NGB7184	7184	593158	Storaks Abed	1967	1941-1980	LT	Denmark	CV	TRUE	11.7	36.7	19.1	35	31.6	-12.12	-11.03	-11.58	T	T	G	G	G	T	C	T	G	C	T	A	C	T	G	G	A	G	T	A	A	C	C
NGB6708	6708	593127	Kron	1925	1896-1940	LT	Sweden	CV	TRUE	10	16.7	12.7	35	100	-11.77	-11.37	-11.57	T	T	G	A	G	T	C	T	G	C	T	A	C	T	G	G	A	G	T	A	A	C	C
NGB23352	23352	593066	Pentium	1996	1981-2012	LT	Denmark	CV	FALSE	NA	NA	NA	NA	NA	-11.42	-11.71	-11.57	T	T	R	A	R	Y	Y	T	K	C	N	M	C	N	G	G	A	T	C	G	A	C	C
NGB9123	9123	593194	Kraka	1980	1941-1980	LT	Denmark	CV	TRUE	0	33.3	13.1	25	43.7	-11.89	-11.22	-11.56	T	T	A	G	G	C	C	T	G	C	T	A	C	T	G	G	A	G	T	G	A	C	C
NGB23351	23351	593065	Miller	2000	1981-2012	LT	Denmark	CV	FALSE	NA	NA	NA	NA	NA	-11.71	-11.34	-11.53	T	T	A	G	G	C	C	T	G	C	T	A	C	T	G	G	A	T	T	A	C	C	C
NGB18	18	593048	Starke	1959	1941-1980	LT	Sweden	CV	TRUE	1.7	40	0	3.3	49.9	-12.13	-10.91	-11.52	T	T	A	A	G	T	C	T	G	C	T	A	C	T	G	G	A	G	T	G	C	C	A
NGB8194	8194	593167	Konge II	1939	1896-1940	LT	Denmark	CV	TRUE	0	11.7	0	8.3	39.8	-12.1	-10.94	-11.52	T	T	A	G	G	T	C	T	G	C	T	A	C	T	G	G	A	G	T	G	A	C	C
NGB6707	6707	593126	Pansar III	1923	1896-1940	LT	Sweden	CV	TRUE	0	20	6.6	33.3	100	-12.03	-11	-11.51	T	T	G	G	G	N	C	T	G	C	T	A	C	T	G	G	A	G	T	G	A	C	C
NGB31730	31730	593087	Penta Sejet	2001	1981-2012	LT	Denmark	CV	FALSE	NA	NA	NA	NA	NA	-11.89	-11.13	-11.51	T	T	G	G	G	C	C	T	G	C	T	A	T	C	A	A	A	T	T	G	C	A	C
NGB6693	6693	593112	Kotte	1896	1896-1940	LT	Sweden	CV	FALSE	NA	NA	NA	NA	NA	-11.71	-11.21	-11.46	T	T	A	G	G	T	C	T	G	C	T	A	C	T	G	G	A	G	T	G	A	C	C
NGB16909	16909	593041	Probat	2000	1981-2012	LT	Denmark	CV	FALSE	NA	NA	NA	NA	NA	-11.69	-11.2	-11.45	T	T	G	G	A	C	C	C	T	C	C	A	C	T	G	G	A	T	C	G	A	C	C
NGB9016	9016	593181	Trifolium 14	1925	1896-1940	LT	Denmark	CV	TRUE	0	33.3	4.4	5	73.1	-11.84	-10.98	-11.41	T	T	A	G	G	T	C	T	G	C	T	A	C	T	G	G	A	G	T	G	A	C	C
NGB8189	8189	593166	Dronning	1940	1896-1940	LT	Sweden	CV	FALSE	NA	NA	NA	NA	NA	-12.2	-10.6	-11.4	T	T	G	A	G	C	C	T	T	C	T	A	C	T	G	G	A	G	T	A	A	C	C
NGB8197	8197	593168	Stand Tystofte	1907	1896-1940	LT	Denmark	CV	TRUE	0	11.7	4.7	5	34.3	-12.43	-10.36	-11.39	T	T	A	G	G	T	C	T	G	C	T	A	C	T	G	G	A	G	T	G	A	C	C
NGB6703	6703	593122	Pansar II	1919	1896-1940	LT	Sweden	CV	TRUE	1.7	3.3	6.5	33.3	99.1	-11.4	-11.34	-11.37	T	T	A	G	G	T	C	T	G	C	T	A	C	T	G	G	A	G	T	N	A	C	C
NGB12242	12242	593010	Pansar I	1915	1896-1940	LT	Sweden	CV	FALSE	NA	NA	NA	NA	NA	-11.76	-10.98	-11.37	T	T	G	A	G	T	C	T	G	C	T	A	C	T	G	G	A	G	T	G	A	C	C
NGB15071	15071	593032	Lone	1994	1981-2012	LT	Denmark	CV	FALSE	NA	NA	NA	NA	NA	-11.93	-10.79	-11.36	T	T	G	G	G	T	C	T	T	C	T	A	C	T	G	G	A	T	T	G	C	C	A
NGB6698	6698	593117	Pudel	1910	1896-1940	LT	Sweden	CV	TRUE	6.7	70	11.8	40	40	-11.74	-10.96	-11.35	T	T	A	G	N	T	C	T	G	C	T	A	C	T	G	G	A	G	T	N	A	C	M
NGB8672	8672	593171	Salut	1982	1981-2012	LT	Sweden	CV	FALSE	NA	NA	NA	NA	NA	-11.79	-10.81	-11.3	T	T	G	A	G	T	C	T	G	C	T	A	C	T	G	G	A	G	T	G	C	C	A
NGB7183	7183	593157	Små II, Tystofte	1915	1896-1940	LT	Denmark	CV	TRUE	0	11.7	1.7	18.3	24.8	-12.08	-10.41	-11.25	T	T	A	N	N	T	C	T	G	C	T	A	C	T	G	G	A	G	N	G	A	C	C
NGB23348	23348	593062	Frimegu	1995	1981-2012	LT	Denmark	CV	FALSE	NA	NA	NA	NA	NA	-11.79	-10.7	-11.25	C	T	G	G	G	T	C	T	T	C	T	A	C	T	G	G	R	T	T	A	A	C	C
NGB8973	8973	593177	Ideal	1929	1896-1940	LT	Denmark	CV	TRUE	0	16.7	1.7	21.7	33.8	-11.77	-10.71	-11.24	T	T	G	A	A	T	C	T	G	C	T	A	C	T	G	G	A	G	T	G	A	C	C
NGB16852	16852	593039	Konsul	1994	1981-2012	LT	Sweden	CV	FALSE	NA	NA	NA	NA	NA	-11.3	-11.02	-11.16	T	T	G	A	G	T	C	T	G	C	T	A	C	T	G	G	G	G	T	G	C	N	A
NGB7027	7027	593152	Dania	1929	1896-1940	LT	Denmark	CV	TRUE	0	1.7	20.7	18.3	58.8	-11.61	-10.27	-10.94	T	T	A	G	G	T	C	T	G	C	T	A	C	T	G	G	A	G	T	G	M	C	C
NGB15072	15072	593033	Brandt	1999	1981-2012	LT	Denmark	CV	FALSE	NA	NA	NA	NA	NA	-11.57	-10.29	-10.93	T	T	G	G	A	C	C	T	T	C	T	A	C	T	G	G	A	G	T	G	A	C	C
NGB16910	16910	593042	Stakado	1995	1981-2012	LT	Denmark	CV	FALSE	NA	NA	NA	NA	NA	-11.25	-10.61	-10.93	T	T	G	G	G	T	C	T	T	C	T	A	C	T	G	G	G	G	N	G	C	C	C
NGB6388	6388	593108	Lading Skæghvede	NA	NA	LT	Denmark	L	TRUE	3.3	0	1.7	0	19.9	-11.61	-10.24	-10.92	N	T	A	A	G	T	C	T	K	C	Y	A	C	T	G	G	A	G	T	R	A	C	M
NGB9062	9062	593186	Mendel II	1952	1941-1980	LT	Sweden	CV	FALSE	NA	NA	NA	NA	NA	-11.05	-10.59	-10.82	T	T	G	G	A	T	C	T	G	C	T	A	C	T	G	G	A	G	T	G	A	C	C
NGB23357	23357	593069	Solist	1999	1981-2012	LT	Denmark	CV	FALSE	NA	NA	NA	NA	NA	-11.23	-9.91	-10.57	T	T	G	G	G	T	C	T	T	C	T	A	C	T	G	G	A	T	C	G	C	C	C
