# Supplementary material for: Genome-Wide Association Analysis of Freezing Tolerance and Winter Hardiness in Winter Wheat of Nordic Origin
Source: Plants (Basel). 2023 Nov 29;12(23):4014. doi: 10.3390/plants12234014 (PMC10708462; doi:10.3390/plants12234014)
Supplement: Supplementary file 1 [file plants-12-04014-s001.zip › Table S2.xlsx]

## Sheet: Supplementary Table 2
Table S2. Summary statistics of LT50 (temperature where 50% of plants are killed) data in 160 winter wheat genotypes.
Group	Number of observations	Mean (°C)	± SD (°C)
Country of Origin
Denmark	41	-11.8	0.64
Sweden	96	-12.4	0.68
Norway	3	-13	0.71
Finland	17	-13.56	0.62
Germany	1	-11.88	NA
Unknown	2	-13.14	0.5
Year of Release
1896-1940	51	-12.15	0.73
1941-1980	46	-12.57	0.79
1981-2012	40	-12.11	0.74
Unknown	23	-13.03	0.8
Culton type
Cultivar	143	-12.3	0.78
Landrace	15	-13.06	0.87
Unknown	2	-13.14	0.5
Level of Freezing Tolerance
Less tolerant	42	-11.42	0.28
Intermediate	87	-12.39	0.33
More tolerant	31	-13.68	0.33
