# Supplementary material for: Genome-Wide Association Analysis of Freezing Tolerance and Winter Hardiness in Winter Wheat of Nordic Origin
Source: Plants (Basel). 2023 Nov 29;12(23):4014. doi: 10.3390/plants12234014 (PMC10708462; doi:10.3390/plants12234014)
Supplement: Supplementary file 1 [file plants-12-04014-s001.zip › Table S3.xlsx]

## Sheet: Supplementary Table 3
Table S3. List of 7401 SNP (single nucleotide polymorphism) markers used in this study, and their MAF (minor allele frequencies).
SNP	MAF
BobWhite_c10126_263	0.125
BobWhite_c10238_127	0.165625
BobWhite_c10343_320	0.340625
BobWhite_c10402_140	0.240625
BobWhite_c10448_80	0.271875
BobWhite_c10539_201	0.2875
BobWhite_c10610_149	0.325
BobWhite_c10614_157	0.234375
BobWhite_c10740_179	0.359375
BobWhite_c10832_1131	0.3
BobWhite_c1085_412	0.178125
BobWhite_c10901_578	0.090625
BobWhite_c10956_71	0.109375
BobWhite_c10977_834	0.125
BobWhite_c11022_78	0.13125
BobWhite_c11042_284	0.15
BobWhite_c11059_169	0.078125
BobWhite_c11374_530	0.371875
BobWhite_c11397_231	0.303125
BobWhite_c11495_120	0.440625
BobWhite_c11512_157	0.228125
BobWhite_c11539_336	0.33125
BobWhite_c11540_60	0.065625
BobWhite_c11808_975	0.153125
BobWhite_c11861_557	0.184375
BobWhite_c12090_117	0.4875
BobWhite_c12144_216	0.0625
BobWhite_c12157_747	0.44375
BobWhite_c12256_96	0.25625
BobWhite_c12355_1548	0.25625
BobWhite_c12426_84	0.04375
BobWhite_c12428_371	0.065625
BobWhite_c12911_788	0.075
BobWhite_c13030_406	0.25
BobWhite_c13099_755	0.440625
BobWhite_c13202_399	0.1375
BobWhite_c13238_386	0.23125
BobWhite_c13373_250	0.06875
BobWhite_c13435_700	0.153125
BobWhite_c13525_262	0.271875
BobWhite_c1361_1187	0.140625
BobWhite_c13654_447	0.05625
BobWhite_c13839_78	0.246875
BobWhite_c13924_707	0.284375
BobWhite_c13977_91	0.121875
BobWhite_c14066_403	0.34375
BobWhite_c14158_112	0.090625
BobWhite_c14291_666	0.259375
BobWhite_c14304_687	0.2875
BobWhite_c14323_288	0.059375
BobWhite_c14365_59	0.33125
BobWhite_c14409_206	0.128125
BobWhite_c14476_80	0.2625
BobWhite_c14495_230	0.2375
BobWhite_c14575_323	0.078125
BobWhite_c1488_504	0.26875
BobWhite_c15075_708	0.05625
BobWhite_c15647_606	0.121875
BobWhite_c15653_484	0.103125
BobWhite_c15773_166	0.078125
BobWhite_c15802_72	0.18125
BobWhite_c15802_720	0.16875
BobWhite_c15870_540	0.353125
BobWhite_c16005_289	0.321875
BobWhite_c1611_1685	0.4125
BobWhite_c1633_643	0.1625
BobWhite_c16439_1143	0.296875
BobWhite_c1656_186	0.49375
BobWhite_c16655_421	0.48125
BobWhite_c16787_205	0.45625
BobWhite_c16847_99	0.40625
BobWhite_c16917_732	0.465625
BobWhite_c16923_64	0.159375
BobWhite_c16987_106	0.215625
BobWhite_c17021_269	0.059375
BobWhite_c17021_297	0.265625
BobWhite_c17045_186	0.290625
BobWhite_c17047_268	0.3375
BobWhite_c1715_887	0.128125
BobWhite_c17385_55	0.225
BobWhite_c17403_635	0.109375
BobWhite_c17750_568	0.071875
BobWhite_c17783_174	0.10625
BobWhite_c17879_519	0.234375
BobWhite_c18136_441	0.28125
BobWhite_c18256_809	0.2625
BobWhite_c18408_199	0.234375
BobWhite_c18540_97	0.14375
BobWhite_c18550_159	0.234375
BobWhite_c18566_106	0.296875
BobWhite_c18672_757	0.10625
BobWhite_c18721_190	0.31875
BobWhite_c19155_246	0.459375
BobWhite_c19346_434	0.475
BobWhite_c19443_131	0.1125
BobWhite_c19647_159	0.259375
BobWhite_c19820_129	0.375
BobWhite_c19919_516	0.34375
BobWhite_c19945_341	0.38125
BobWhite_c20051_53	0.25625
BobWhite_c20073_382	0.1875
BobWhite_c2027_215	0.0375
BobWhite_c2027_84	0.059375
BobWhite_c20374_162	0.315625
BobWhite_c20453_589	0.159375
BobWhite_c20514_70	0.3
BobWhite_c20689_427	0.428125
BobWhite_c20692_123	0.125
BobWhite_c20782_697	0.15625
BobWhite_c20909_243	0.353125
BobWhite_c21827_104	0.1875
BobWhite_c22036_399	0.1375
BobWhite_c22075_85	0.0625
BobWhite_c22086_444	0.0875
BobWhite_c22134_398	0.421875
BobWhite_c22266_315	0.159375
BobWhite_c2236_111	0.109375
BobWhite_c22370_352	0.084375
BobWhite_c22638_135	0.203125
BobWhite_c22827_193	0.065625
BobWhite_c2296_94	0.296875
BobWhite_c23074_304	0.23125
BobWhite_c23392_496	0.28125
BobWhite_c23416_168	0.06875
BobWhite_c23617_167	0.140625
BobWhite_c23736_153	0.23125
BobWhite_c23790_98	0.078125
BobWhite_c23903_443	0.228125
BobWhite_c23946_75	0.1875
BobWhite_c23953_312	0.078125
BobWhite_c24063_231	0.25625
BobWhite_c24069_257	0.159375
BobWhite_c2423_99	0.06875
BobWhite_c24364_73	0.065625
BobWhite_c24484_240	0.165625
BobWhite_c24760_142	0.30625
BobWhite_c2506_332	0.0375
BobWhite_c25105_507	0.2125
BobWhite_c2514_109	0.403125
BobWhite_c25163_178	0.35
BobWhite_c25670_425	0.1375
BobWhite_c2568_115	0.040625
BobWhite_c25708_334	0.23125
BobWhite_c26082_239	0.053125
BobWhite_c26374_339	0.265625
BobWhite_c2646_141	0.471875
BobWhite_c26529_106	0.2375
BobWhite_c26534_532	0.1625
BobWhite_c26569_190	0.446875
BobWhite_c26803_89	0.128125
BobWhite_c27193_217	0.378125
BobWhite_c2730_245	0.36875
BobWhite_c27364_124	0.059375
BobWhite_c27751_206	0.3375
BobWhite_c27751_95	0.321875
BobWhite_c28058_232	0.134375
BobWhite_c28090_175	0.175
BobWhite_c28133_87	0.084375
BobWhite_c2822_228	0.1125
BobWhite_c28250_220	0.384375
BobWhite_c28295_256	0.071875
BobWhite_c28333_454	0.109375
BobWhite_c2844_569	0.4375
BobWhite_c28635_785	0.078125
BobWhite_c28819_517	0.23125
BobWhite_c28819_733	0.221875
BobWhite_c2988_493	0.496875
BobWhite_c30232_154	0.10625
BobWhite_c30622_180	0.165625
BobWhite_c31129_60	0.071875
BobWhite_c31163_694	0.0875
BobWhite_c32336_198	0.2875
BobWhite_c32336_504	0.28125
BobWhite_c32347_219	0.203125
BobWhite_c3269_141	0.13125
BobWhite_c32938_264	0.45
BobWhite_c33464_133	0.496875
BobWhite_c3392_749	0.409375
BobWhite_c34125_183	0.278125
BobWhite_c34548_96	0.190625
BobWhite_c34551_714	0.14375
BobWhite_c34650_141	0.05625
BobWhite_c34650_78	0.05625
BobWhite_c34689_116	0.23125
BobWhite_c34759_227	0.390625
BobWhite_c34798_184	0.471875
BobWhite_c34920_228	0.1875
BobWhite_c35035_317	0.275
BobWhite_c3541_152	0.153125
BobWhite_c35443_249	0.15625
BobWhite_c3564_81	0.1375
BobWhite_c36070_89	0.271875
BobWhite_c36072_272	0.165625
BobWhite_c36944_167	0.125
BobWhite_c3714_659	0.2875
BobWhite_c3721_224	0.0875
BobWhite_c37325_92	0.078125
BobWhite_c37358_208	0.315625
BobWhite_c38001_528	0.4875
BobWhite_c38340_243	0.178125
BobWhite_c38408_71	0.471875
BobWhite_c3871_735	0.4375
BobWhite_c38713_202	0.434375
BobWhite_c38957_159	0.284375
BobWhite_c3902_175	0.065625
BobWhite_c3902_210	0.3125
BobWhite_c39153_131	0.05625
BobWhite_c39214_164	0.159375
BobWhite_c39364_231	0.115625
BobWhite_c39656_106	0.178125
BobWhite_c40087_93	0.3375
BobWhite_c40244_73	0.484375
BobWhite_c40305_243	0.215625
BobWhite_c40424_143	0.303125
BobWhite_c40455_116	0.146875
BobWhite_c40561_305	0.48125
BobWhite_c40583_146	0.165625
BobWhite_c40602_313	0.0875
BobWhite_c40633_308	0.3
BobWhite_c41272_159	0.14375
BobWhite_c41441_185	0.0875
BobWhite_c41535_52	0.184375
BobWhite_c41676_137	0.175
BobWhite_c41725_430	0.171875
BobWhite_c41847_333	0.05
BobWhite_c42102_237	0.075
BobWhite_c42198_254	0.084375
BobWhite_c42349_99	0.25625
BobWhite_c4236_410	0.15625
BobWhite_c4256_213	0.125
BobWhite_c42716_71	0.45
BobWhite_c43135_397	0.434375
BobWhite_c43213_184	0.1625
BobWhite_c43557_103	0.065625
BobWhite_c43681_334	0.134375
BobWhite_c43731_313	0.328125
BobWhite_c4399_447	0.103125
BobWhite_c441_976	0.0875
BobWhite_c44404_312	0.165625
BobWhite_c44460_821	0.36875
BobWhite_c44558_325	0.184375
BobWhite_c44691_648	0.434375
BobWhite_c4481_96	0.11875
BobWhite_c4482_73	0.178125
BobWhite_c44947_277	0.45
BobWhite_c4499_153	0.23125
BobWhite_c45091_53	0.340625
BobWhite_c45118_495	0.084375
BobWhite_c4517_120	0.253125
BobWhite_c45623_215	0.23125
BobWhite_c45848_120	0.309375
BobWhite_c46338_76	0.084375
BobWhite_c46349_402	0.240625
BobWhite_c4646_119	0.39375
BobWhite_c46501_92	0.0875
BobWhite_c46772_564	0.2
BobWhite_c47040_185	0.065625
BobWhite_c47086_539	0.15
BobWhite_c47103_205	0.134375
BobWhite_c47103_84	0.134375
BobWhite_c47143_592	0.2375
BobWhite_c47168_289	0.471875
BobWhite_c47168_598	0.453125
BobWhite_c4729_243	0.15625
BobWhite_c47357_535	0.19375
BobWhite_c47456_121	0.215625
BobWhite_c47709_141	0.19375
BobWhite_c4773_85	0.35
BobWhite_c47740_85	0.084375
BobWhite_c478_1386	0.265625
BobWhite_c47831_87	0.23125
BobWhite_c48071_144	0.45625
BobWhite_c4810_190	0.175
BobWhite_c4852_323	0.46875
BobWhite_c4872_97	0.2875
BobWhite_c5072_107	0.2875
BobWhite_c5095_634	0.109375
BobWhite_c5096_156	0.071875
BobWhite_c5178_188	0.271875
BobWhite_c5191_362	0.171875
BobWhite_c5191_563	0.18125
BobWhite_c5235_710	0.16875
BobWhite_c5246_196	0.240625
BobWhite_c5337_225	0.378125
BobWhite_c53978_99	0.33125
BobWhite_c5418_82	0.2
BobWhite_c5457_1440	0.175
BobWhite_c5461_338	0.265625
BobWhite_c5564_86	0.115625
BobWhite_c5756_516	0.41875
BobWhite_c5782_825	0.25625
BobWhite_c5852_103	0.259375
BobWhite_c5852_685	0.246875
BobWhite_c5872_65	0.290625
BobWhite_c5917_529	0.29375
BobWhite_c6055_185	0.16875
BobWhite_c6094_447	0.234375
BobWhite_c6166_319	0.478125
BobWhite_c6328_410	0.05625
BobWhite_c634_420	0.184375
BobWhite_c6365_965	0.259375
BobWhite_c6527_222	0.33125
BobWhite_c662_148	0.146875
BobWhite_c66315_505	0.31875
BobWhite_c6633_179	0.2125
BobWhite_c6633_395	0.21875
BobWhite_c6966_236	0.153125
BobWhite_c6998_365	0.134375
BobWhite_c7070_196	0.125
BobWhite_c7114_237	0.484375
BobWhite_c7145_355	0.490625
BobWhite_c7157_633	0.384375
BobWhite_c7260_197	0.1125
BobWhite_c7274_333	0.225
BobWhite_c7281_328	0.053125
BobWhite_c7604_181	0.478125
BobWhite_c7786_376	0.30625
BobWhite_c8027_421	0.1375
BobWhite_c8076_154	0.19375
BobWhite_c8113_532	0.359375
BobWhite_c8202_245	0.26875
BobWhite_c8218_162	0.478125
BobWhite_c8253_397	0.11875
BobWhite_c8266_582	0.11875
BobWhite_c8340_511	0.109375
BobWhite_c836_422	0.121875
BobWhite_c8428_346	0.25625
BobWhite_c8571_699	0.21875
BobWhite_c8680_918	0.315625
BobWhite_c8879_142	0.165625
BobWhite_c8945_134	0.0875
BobWhite_c8982_226	0.28125
BobWhite_c9057_118	0.115625
BobWhite_c911_127	0.271875
BobWhite_c9330_499	0.159375
BobWhite_c948_52	0.3
BobWhite_c9690_94	0.490625
BobWhite_c9704_273	0.08125
BobWhite_c9705_429	0.453125
BobWhite_c9711_71	0.446875
BobWhite_c9963_51	0.265625
BobWhite_rep_c48835_225	0.084375
BobWhite_rep_c49102_169	0.115625
BobWhite_rep_c49176_485	0.49375
BobWhite_rep_c49207_243	0.146875
BobWhite_rep_c49367_405	0.2875
BobWhite_rep_c49755_131	0.3
BobWhite_rep_c49979_373	0.496875
BobWhite_rep_c49999_538	0.25
BobWhite_rep_c50057_164	0.075
BobWhite_rep_c50066_63	0.41875
BobWhite_rep_c50145_387	0.4875
BobWhite_rep_c50186_469	0.403125
BobWhite_rep_c50349_139	0.409375
BobWhite_rep_c50457_813	0.471875
BobWhite_rep_c50458_213	0.234375
BobWhite_rep_c50822_462	0.125
BobWhite_rep_c51132_85	0.346875
BobWhite_rep_c51247_189	0.415625
BobWhite_rep_c51612_864	0.165625
BobWhite_rep_c52808_186	0.059375
BobWhite_rep_c52911_146	0.33125
BobWhite_rep_c52979_181	0.465625
BobWhite_rep_c53007_100	0.484375
BobWhite_rep_c53418_120	0.271875
BobWhite_rep_c55035_124	0.15
BobWhite_rep_c57575_65	0.35
BobWhite_rep_c58252_112	0.3875
BobWhite_rep_c60776_638	0.425
BobWhite_rep_c61602_139	0.0625
BobWhite_rep_c62475_70	0.225
BobWhite_rep_c62964_873	0.303125
BobWhite_rep_c63166_725	0.171875
BobWhite_rep_c63278_349	0.328125
BobWhite_rep_c63332_67	0.38125
BobWhite_rep_c63429_271	0.31875
BobWhite_rep_c63648_306	0.06875
BobWhite_rep_c63940_205	0.146875
BobWhite_rep_c63943_76	0.09375
BobWhite_rep_c64049_232	0.11875
BobWhite_rep_c64068_241	0.2875
BobWhite_rep_c64260_207	0.284375
BobWhite_rep_c64679_73	0.15
BobWhite_rep_c64680_305	0.315625
BobWhite_rep_c64766_352	0.11875
BobWhite_rep_c64768_264	0.48125
BobWhite_rep_c64944_264	0.090625
BobWhite_rep_c65013_174	0.2625
BobWhite_rep_c65414_125	0.490625
BobWhite_rep_c65414_271	0.315625
BobWhite_rep_c65835_277	0.33125
BobWhite_rep_c65994_267	0.078125
BobWhite_rep_c66032_270	0.2
BobWhite_rep_c66957_84	0.49375
BobWhite_rep_c66990_294	0.203125
BobWhite_s64797_152	0.165625
BobWhite_s65081_93	0.06875
BobWhite_s66966_118	0.346875
BobWhite_s67148_292	0.234375
BobWhite_s67247_276	0.06875
BS00000006_51	0.36875
BS00000066_51	0.296875
BS00000137_51	0.371875
BS00000209_51	0.165625
BS00000445_51	0.075
BS00000721_51	0.31875
BS00000747_51	0.490625
BS00001478_51	0.078125
BS00001835_51	0.496875
BS00002208_51	0.1625
BS00002216_51	0.28125
BS00002484_51	0.125
BS00002897_51	0.315625
BS00003088_51	0.15
BS00003119_51	0.25625
BS00003214_51	0.11875
BS00003350_51	0.2375
BS00003404_51	0.16875
BS00003522_51	0.1
BS00003568_51	0.109375
BS00003575_51	0.103125
BS00003655_51	0.13125
BS00003697_51	0.265625
BS00003726_51	0.2875
BS00003730_51	0.121875
BS00003761_51	0.109375
BS00003813_51	0.04375
BS00003816_51	0.0625
BS00003839_51	0.175
BS00003852_51	0.1375
BS00003866_51	0.371875
BS00003867_51	0.215625
BS00003891_51	0.1375
BS00003955_51	0.175
BS00004170_51	0.30625
BS00004224_51	0.296875
BS00004413_51	0.296875
BS00004724_51	0.346875
BS00004903_51	0.059375
BS00005004_51	0.05625
BS00005265_51	0.2875
BS00005311_51	0.065625
BS00005860_51	0.2
BS00006674_51	0.296875
BS00007429_51	0.434375
BS00007437_51	0.16875
BS00007502_51	0.384375
BS00007684_51	0.425
BS00008727_51	0.146875
BS00009060_51	0.35625
BS00009247_51	0.284375
BS00009287_51	0.134375
BS00009331_51	0.2875
BS00009342_51	0.35
BS00009369_51	0.35625
BS00009457_51	0.1125
BS00009458_51	0.44375
BS00009480_51	0.375
BS00009492_51	0.384375
BS00009531_51	0.478125
BS00009549_51	0.265625
BS00009789_51	0.34375
BS00009807_51	0.0875
BS00009810_51	0.053125
BS00009882_51	0.153125
BS00010012_51	0.49375
BS00010055_51	0.046875
BS00010098_51	0.375
BS00010115_51	0.353125
BS00010130_51	0.3
BS00010131_51	0.16875
BS00010144_51	0.25
BS00010204_51	0.140625
BS00010287_51	0.04375
BS00010311_51	0.146875
BS00010316_51	0.340625
BS00010352_51	0.0625
BS00010403_51	0.25
BS00010514_51	0.14375
BS00010531_51	0.315625
BS00010557_51	0.134375
BS00010573_51	0.496875
BS00010616_51	0.159375
BS00010659_51	0.28125
BS00010780_51	0.04375
BS00010811_51	0.19375
BS00010819_51	0.05
BS00010849_51	0.0875
BS00010886_51	0.125
BS00010925_51	0.16875
BS00010988_51	0.34375
BS00010992_51	0.05625
BS00010993_51	0.40625
BS00011010_51	0.25625
BS00011039_51	0.346875
BS00011047_51	0.178125
BS00011060_51	0.328125
BS00011061_51	0.30625
BS00011072_51	0.45625
BS00011109_51	0.05625
BS00011111_51	0.084375
BS00011165_51	0.484375
BS00011202_51	0.359375
BS00011205_51	0.30625
BS00011235_51	0.228125
BS00011276_51	0.1625
BS00011330_51	0.36875
BS00011425_51	0.46875
BS00011436_51	0.271875
BS00011438_51	0.05
BS00011451_51	0.05
BS00011469_51	0.171875
BS00011492_51	0.25625
BS00011510_51	0.215625
BS00011514_51	0.378125
BS00011539_51	0.1125
BS00011570_51	0.0625
BS00011578_51	0.35
BS00011596_51	0.321875
BS00011612_51	0.1375
BS00011622_51	0.328125
BS00011624_51	0.084375
BS00011695_51	0.175
BS00011794_51	0.1625
BS00011795_51	0.109375
BS00011869_51	0.153125
BS00011892_51	0.271875
BS00011935_51	0.478125
BS00011962_51	0.271875
BS00012014_51	0.428125
BS00012023_51	0.071875
BS00012036_51	0.365625
BS00012042_51	0.26875
BS00012069_51	0.4375
BS00012071_51	0.440625
BS00013563_51	0.05625
BS00015653_51	0.2
BS00015680_51	0.38125
BS00016650_51	0.390625
BS00017187_51	0.228125
BS00018707_51	0.375
BS00018740_51	0.2875
BS00018764_51	0.44375
BS00020236_51	0.403125
BS00020459_51	0.246875
BS00020610_51	0.090625
BS00021658_51	0.0875
BS00021660_51	0.259375
BS00021680_51	0.353125
BS00021688_51	0.228125
BS00021692_51	0.36875
BS00021695_51	0.225
BS00021702_51	0.165625
BS00021704_51	0.075
BS00021706_51	0.253125
BS00021714_51	0.49375
BS00021716_51	0.05625
BS00021718_51	0.36875
BS00021728_51	0.378125
BS00021730_51	0.040625
BS00021735_51	0.1
BS00021739_51	0.459375
BS00021745_51	0.071875
BS00021780_51	0.31875
BS00021850_51	0.2625
BS00021860_51	0.353125
BS00021873_51	0.353125
BS00021877_51	0.103125
BS00021911_51	0.128125
BS00021919_51	0.34375
BS00021923_51	0.1375
BS00021939_51	0.34375
BS00021957_51	0.265625
BS00021968_51	0.31875
BS00021971_51	0.371875
BS00021972_51	0.1375
BS00021984_51	0.321875
BS00021997_51	0.465625
BS00021999_51	0.378125
BS00022003_51	0.06875
BS00022009_51	0.1375
BS00022025_51	0.321875
BS00022032_51	0.36875
BS00022045_51	0.215625
BS00022049_51	0.415625
BS00022053_51	0.084375
BS00022056_51	0.084375
BS00022072_51	0.065625
BS00022090_51	0.13125
BS00022098_51	0.065625
BS00022110_51	0.15
BS00022125_51	0.0625
BS00022127_51	0.46875
BS00022129_51	0.35
BS00022145_51	0.146875
BS00022169_51	0.3375
BS00022176_51	0.4375
BS00022178_51	0.128125
BS00022180_51	0.059375
BS00022201_51	0.0375
BS00022202_51	0.11875
BS00022206_51	0.134375
BS00022211_51	0.246875
BS00022212_51	0.153125
BS00022226_51	0.10625
BS00022234_51	0.425
BS00022242_51	0.465625
BS00022249_51	0.340625
BS00022256_51	0.19375
BS00022261_51	0.1
BS00022267_51	0.13125
BS00022276_51	0.425
BS00022292_51	0.08125
BS00022295_51	0.1625
BS00022299_51	0.33125
BS00022336_51	0.278125
BS00022364_51	0.25
BS00022366_51	0.2125
BS00022368_51	0.4625
BS00022395_51	0.24375
BS00022396_51	0.290625
BS00022403_51	0.1875
BS00022409_51	0.090625
BS00022417_51	0.3125
BS00022422_51	0.153125
BS00022424_51	0.3375
BS00022431_51	0.103125
BS00022436_51	0.1375
BS00022459_51	0.35
BS00022466_51	0.23125
BS00022475_51	0.159375
BS00022480_51	0.14375
BS00022482_51	0.115625
BS00022487_51	0.071875
BS00022490_51	0.0625
BS00022500_51	0.2875
BS00022505_51	0.115625
BS00022512_51	0.40625
BS00022520_51	0.221875
BS00022522_51	0.140625
BS00022523_51	0.2375
BS00022532_51	0.04375
BS00022534_51	0.459375
BS00022537_51	0.128125
BS00022541_51	0.115625
BS00022551_51	0.425
BS00022576_51	0.478125
BS00022610_51	0.15625
BS00022611_51	0.278125
BS00022625_51	0.109375
BS00022652_51	0.16875
BS00022653_51	0.1
BS00022657_51	0.365625
BS00022660_51	0.140625
BS00022666_51	0.096875
BS00022667_51	0.0875
BS00022673_51	0.446875
BS00022688_51	0.13125
BS00022698_51	0.071875
BS00022699_51	0.14375
BS00022703_51	0.371875
BS00022738_51	0.078125
BS00022747_51	0.1375
BS00022751_51	0.475
BS00022754_51	0.41875
BS00022761_51	0.3125
BS00022768_51	0.16875
BS00022772_51	0.246875
BS00022798_51	0.25625
BS00022805_51	0.0875
BS00022810_51	0.196875
BS00022813_51	0.30625
BS00022824_51	0.33125
BS00022830_51	0.35625
BS00022838_51	0.43125
BS00022851_51	0.36875
BS00022861_51	0.371875
BS00022882_51	0.115625
BS00022884_51	0.35625
BS00022902_51	0.34375
BS00022913_51	0.165625
BS00022916_51	0.215625
BS00022920_51	0.178125
BS00022940_51	0.3
BS00022949_51	0.3
BS00022950_51	0.296875
BS00022982_51	0.321875
BS00022989_51	0.378125
BS00022991_51	0.09375
BS00022993_51	0.2375
BS00023006_51	0.09375
BS00023009_51	0.125
BS00023024_51	0.25
BS00023028_51	0.409375
BS00023049_51	0.1375
BS00023055_51	0.23125
BS00023068_51	0.31875
BS00023071_51	0.425
BS00023072_51	0.165625
BS00023074_51	0.059375
BS00023080_51	0.10625
BS00023112_51	0.125
BS00023114_51	0.340625
BS00023126_51	0.259375
BS00023130_51	0.1375
BS00023138_51	0.3125
BS00023140_51	0.353125
BS00023142_51	0.059375
BS00023151_51	0.4125
BS00023152_51	0.25625
BS00023161_51	0.19375
BS00023201_51	0.1125
BS00023202_51	0.278125
BS00023203_51	0.371875
BS00023222_51	0.4
BS00023337_51	0.284375
BS00023673_51	0.40625
BS00023847_51	0.378125
BS00023993_51	0.48125
BS00024065_51	0.240625
BS00024107_51	0.215625
BS00024215_51	0.26875
BS00024499_51	0.1
BS00024619_51	0.25625
BS00024643_51	0.128125
BS00024717_51	0.084375
BS00024761_51	0.1125
BS00024786_51	0.425
BS00024814_51	0.1625
BS00024829_51	0.159375
BS00024921_51	0.25625
BS00024993_51	0.0375
BS00025017_51	0.090625
BS00025084_51	0.253125
BS00025302_51	0.065625
BS00025560_51	0.421875
BS00025736_51	0.0625
BS00025795_51	0.1
BS00025819_51	0.421875
BS00025880_51	0.35
BS00026203_51	0.19375
BS00026432_51	0.446875
BS00026456_51	0.15
BS00027006_51	0.30625
BS00027054_51	0.16875
BS00027058_51	0.184375
BS00027770_51	0.24375
BS00028183_51	0.203125
BS00028217_51	0.15
BS00028874_51	0.04375
BS00029127_51	0.140625
BS00029208_51	0.053125
BS00029282_51	0.4625
BS00029287_51	0.228125
BS00029332_51	0.071875
BS00029342_51	0.315625
BS00029434_51	0.19375
BS00029548_51	0.06875
BS00030043_51	0.303125
BS00030136_51	0.140625
BS00030165_51	0.109375
BS00030430_51	0.21875
BS00030571_51	0.375
BS00030581_51	0.225
BS00030644_51	0.040625
BS00030843_51	0.19375
BS00030911_51	0.259375
BS00031073_51	0.11875
BS00031200_51	0.284375
BS00031339_51	0.06875
BS00031411_51	0.234375
BS00031658_51	0.14375
BS00031746_51	0.146875
BS00031814_51	0.421875
BS00031923_51	0.153125
BS00032082_51	0.315625
BS00032112_51	0.459375
BS00032203_51	0.2875
BS00032524_51	0.3875
BS00032606_51	0.259375
BS00032623_51	0.08125
BS00032830_51	0.21875
BS00033229_51	0.3375
BS00033442_51	0.184375
BS00033612_51	0.1875
BS00033795_51	0.175
BS00034085_51	0.34375
BS00034147_51	0.3625
BS00034148_51	0.496875
BS00034174_51	0.296875
BS00034245_51	0.40625
BS00034255_51	0.16875
BS00034303_51	0.1
BS00034304_51	0.09375
BS00034334_51	0.196875
BS00034553_51	0.18125
BS00034554_51	0.178125
BS00034925_51	0.053125
BS00035032_51	0.49375
BS00035083_51	0.103125
BS00035256_51	0.303125
BS00035273_51	0.46875
BS00035307_51	0.065625
BS00035426_51	0.228125
BS00035533_51	0.209375
BS00035630_51	0.275
BS00035640_51	0.446875
BS00035690_51	0.103125
BS00035732_51	0.26875
BS00035883_51	0.090625
BS00036189_51	0.259375
BS00036362_51	0.296875
BS00036397_51	0.484375
BS00036421_51	0.20625
BS00036767_51	0.396875
BS00036851_51	0.4875
BS00036878_51	0.134375
BS00037002_51	0.325
BS00037020_51	0.146875
BS00037103_51	0.19375
BS00037246_51	0.225
BS00037278_51	0.384375
BS00037345_51	0.253125
BS00037357_51	0.4375
BS00037400_51	0.0625
BS00037462_51	0.065625
BS00037464_51	0.08125
BS00037871_51	0.125
BS00037976_51	0.3875
BS00038217_51	0.184375
BS00038218_51	0.184375
BS00038834_51	0.1375
BS00039118_51	0.146875
BS00039135_51	0.41875
BS00039148_51	0.078125
BS00039210_51	0.24375
BS00039211_51	0.2375
BS00039218_51	0.359375
BS00039406_51	0.415625
BS00039422_51	0.11875
BS00039492_51	0.259375
BS00039498_51	0.290625
BS00039641_51	0.39375
BS00039740_51	0.221875
BS00039749_51	0.265625
BS00039874_51	0.1125
BS00039935_51	0.13125
BS00039936_51	0.140625
BS00039983_51	0.40625
BS00040166_51	0.065625
BS00040283_51	0.128125
BS00040305_51	0.109375
BS00040336_51	0.25
BS00040337_51	0.275
BS00040415_51	0.253125
BS00040590_51	0.109375
BS00040742_51	0.146875
BS00040743_51	0.15
BS00040814_51	0.31875
BS00040916_51	0.340625
BS00041063_51	0.075
BS00041355_51	0.046875
BS00041707_51	0.253125
BS00041735_51	0.465625
BS00041742_51	0.06875
BS00041816_51	0.1
BS00041911_51	0.15625
BS00042014_51	0.25
BS00042131_51	0.23125
BS00043082_51	0.434375
BS00043099_51	0.184375
BS00043103_51	0.3125
BS00043286_51	0.340625
BS00044311_51	0.15
BS00044360_51	0.2
BS00044408_51	0.06875
BS00044443_51	0.234375
BS00044720_51	0.25625
BS00045330_51	0.121875
BS00045446_51	0.178125
BS00045568_51	0.303125
BS00046052_51	0.05625
BS00046164_51	0.259375
BS00046165_51	0.10625
BS00046166_51	0.153125
BS00046261_51	0.39375
BS00046263_51	0.146875
BS00046264_51	0.153125
BS00046601_51	0.178125
BS00046772_51	0.134375
BS00046963_51	0.234375
BS00046976_51	0.121875
BS00046977_51	0.1125
BS00047070_51	0.159375
BS00047242_51	0.3375
BS00047797_51	0.134375
BS00047901_51	0.06875
BS00048031_51	0.2375
BS00048067_51	0.315625
BS00048090_51	0.246875
BS00048117_51	0.04375
BS00048191_51	0.109375
BS00048489_51	0.275
BS00048572_51	0.053125
BS00048610_51	0.109375
BS00048754_51	0.309375
BS00048757_51	0.25
BS00048794_51	0.359375
BS00049032_51	0.25
BS00049213_51	0.265625
BS00049514_51	0.23125
BS00049565_51	0.1
BS00049570_51	0.184375
BS00049644_51	0.321875
BS00049730_51	0.096875
BS00049793_51	0.3375
BS00049927_51	0.059375
BS00049942_51	0.11875
BS00049977_51	0.3
BS00049997_51	0.275
BS00050057_51	0.478125
BS00050522_51	0.2625
BS00050993_51	0.384375
BS00051105_51	0.203125
BS00051826_51	0.1375
BS00052057_51	0.11875
BS00052423_51	0.246875
BS00054287_51	0.303125
BS00054496_51	0.2875
BS00054881_51	0.33125
BS00055211_51	0.41875
BS00055761_51	0.259375
BS00055768_51	0.090625
BS00055769_51	0.09375
BS00055866_51	0.178125
BS00056089_51	0.2375
BS00056147_51	0.28125
BS00056258_51	0.0625
BS00056278_51	0.128125
BS00056550_51	0.184375
BS00056624_51	0.134375
BS00056737_51	0.36875
BS00056823_51	0.18125
BS00056932_51	0.346875
BS00056933_51	0.34375
BS00057059_51	0.171875
BS00057060_51	0.1875
BS00057293_51	0.353125
BS00057323_51	0.059375
BS00057445_51	0.29375
BS00057487_51	0.05625
BS00058272_51	0.36875
BS00058554_51	0.171875
BS00058654_51	0.178125
BS00059061_51	0.2375
BS00059062_51	0.2375
BS00059098_51	0.04375
BS00059416_51	0.215625
BS00059422_51	0.05625
BS00059454_51	0.371875
BS00059503_51	0.090625
BS00059847_51	0.221875
BS00059887_51	0.10625
BS00059896_51	0.303125
BS00059929_51	0.321875
BS00060015_51	0.39375
BS00060029_51	0.28125
BS00060041_51	0.3625
BS00060073_51	0.10625
BS00060255_51	0.234375
BS00060596_51	0.146875
BS00060666_51	0.11875
BS00060686_51	0.090625
BS00060838_51	0.24375
BS00061125_51	0.403125
BS00061179_51	0.06875
BS00061387_51	0.31875
BS00061593_51	0.0875
BS00061911_51	0.159375
BS00062304_51	0.075
BS00062425_51	0.446875
BS00062618_51	0.253125
BS00062644_51	0.1875
BS00062645_51	0.153125
BS00062691_51	0.125
BS00062715_51	0.259375
BS00062724_51	0.15625
BS00062731_51	0.2375
BS00062732_51	0.11875
BS00062759_51	0.2
BS00062781_51	0.0625
BS00062806_51	0.240625
BS00062823_51	0.3
BS00062843_51	0.184375
BS00062864_51	0.15
BS00062892_51	0.246875
BS00062967_51	0.31875
BS00062996_51	0.384375
BS00063034_51	0.346875
BS00063063_51	0.04375
BS00063092_51	0.428125
BS00063099_51	0.134375
BS00063160_51	0.15625
BS00063174_51	0.2375
BS00063208_51	0.2875
BS00063214_51	0.365625
BS00063225_51	0.203125
BS00063236_51	0.440625
BS00063267_51	0.06875
BS00063300_51	0.353125
BS00063302_51	0.275
BS00063365_51	0.1625
BS00063368_51	0.221875
BS00063378_51	0.23125
BS00063423_51	0.075
BS00063429_51	0.109375
BS00063458_51	0.303125
BS00063511_51	0.3
BS00063512_51	0.31875
BS00063517_51	0.19375
BS00063549_51	0.275
BS00063577_51	0.13125
BS00063608_51	0.215625
BS00063624_51	0.478125
BS00063625_51	0.21875
BS00063631_51	0.19375
BS00063674_51	0.1375
BS00063710_51	0.19375
BS00063744_51	0.234375
BS00063748_51	0.1625
BS00063769_51	0.159375
BS00063801_51	0.13125
BS00063804_51	0.159375
BS00063809_51	0.134375
BS00063822_51	0.10625
BS00063823_51	0.109375
BS00063928_51	0.309375
BS00063946_51	0.409375
BS00063973_51	0.45625
BS00063990_51	0.41875
BS00064002_51	0.125
BS00064032_51	0.090625
BS00064039_51	0.059375
BS00064052_51	0.31875
BS00064077_51	0.09375
BS00064142_51	0.18125
BS00064146_51	0.175
BS00064162_51	0.059375
BS00064227_51	0.359375
BS00064269_51	0.446875
BS00064344_51	0.290625
BS00064349_51	0.446875
BS00064369_51	0.090625
BS00064478_51	0.353125
BS00064515_51	0.48125
BS00064528_51	0.0875
BS00064536_51	0.10625
BS00064548_51	0.046875
BS00064620_51	0.375
BS00064632_51	0.1625
BS00064638_51	0.28125
BS00064654_51	0.178125
BS00064660_51	0.125
BS00064679_51	0.334375
BS00064761_51	0.396875
BS00064767_51	0.328125
BS00064783_51	0.33125
BS00064813_51	0.20625
BS00064820_51	0.3125
BS00064851_51	0.315625
BS00064885_51	0.05
BS00064886_51	0.05
BS00064892_51	0.284375
BS00064893_51	0.090625
BS00064905_51	0.41875
BS00064935_51	0.16875
BS00065001_51	0.203125
BS00065030_51	0.234375
BS00065053_51	0.3125
BS00065076_51	0.16875
BS00065105_51	0.35
BS00065107_51	0.209375
BS00065128_51	0.071875
BS00065139_51	0.34375
BS00065146_51	0.11875
BS00065147_51	0.14375
BS00065152_51	0.203125
BS00065217_51	0.36875
BS00065245_51	0.3125
BS00065264_51	0.390625
BS00065265_51	0.384375
BS00065292_51	0.040625
BS00065296_51	0.121875
BS00065313_51	0.21875
BS00065327_51	0.296875
BS00065366_51	0.353125
BS00065390_51	0.19375
BS00065418_51	0.15
BS00065419_51	0.440625
BS00065422_51	0.415625
BS00065468_51	0.384375
BS00065481_51	0.06875
BS00065529_51	0.40625
BS00065543_51	0.240625
BS00065551_51	0.209375
BS00065555_51	0.175
BS00065633_51	0.040625
BS00065680_51	0.05625
BS00065693_51	0.5
BS00065697_51	0.128125
BS00065701_51	0.1375
BS00065714_51	0.13125
BS00065717_51	0.465625
BS00065722_51	0.096875
BS00065732_51	0.059375
BS00065783_51	0.08125
BS00065844_51	0.109375
BS00065863_51	0.15625
BS00065864_51	0.353125
BS00065873_51	0.246875
BS00065889_51	0.1
BS00065930_51	0.1125
BS00065934_51	0.403125
BS00065946_51	0.4375
BS00065956_51	0.23125
BS00065981_51	0.075
BS00066015_51	0.26875
BS00066024_51	0.284375
BS00066119_51	0.26875
BS00066127_51	0.115625
BS00066128_51	0.15
BS00066144_51	0.08125
BS00066165_51	0.1125
BS00066186_51	0.346875
BS00066188_51	0.159375
BS00066226_51	0.334375
BS00066230_51	0.334375
BS00066271_51	0.078125
BS00066278_51	0.471875
BS00066289_51	0.13125
BS00066305_51	0.278125
BS00066319_51	0.29375
BS00066413_51	0.3875
BS00066437_51	0.21875
BS00066446_51	0.346875
BS00066447_51	0.059375
BS00066456_51	0.04375
BS00066467_51	0.103125
BS00066468_51	0.253125
BS00066475_51	0.30625
BS00066479_51	0.265625
BS00066545_51	0.3875
BS00066549_51	0.04375
BS00066647_51	0.040625
BS00066651_51	0.253125
BS00066661_51	0.346875
BS00066691_51	0.253125
BS00066719_51	0.31875
BS00066770_51	0.16875
BS00066783_51	0.234375
BS00066847_51	0.046875
BS00066873_51	0.0875
BS00066891_51	0.20625
BS00066903_51	0.125
BS00066916_51	0.05625
BS00067003_51	0.3375
BS00067024_51	0.309375
BS00067028_51	0.175
BS00067117_51	0.175
BS00067140_51	0.190625
BS00067150_51	0.196875
BS00067152_51	0.228125
BS00067163_51	0.315625
BS00067280_51	0.265625
BS00067337_51	0.15625
BS00067339_51	0.10625
BS00067421_51	0.190625
BS00067428_51	0.125
BS00067436_51	0.059375
BS00067452_51	0.478125
BS00067453_51	0.353125
BS00067499_51	0.128125
BS00067530_51	0.18125
BS00067540_51	0.4375
BS00067584_51	0.45
BS00067590_51	0.053125
BS00067599_51	0.203125
BS00067619_51	0.403125
BS00067627_51	0.24375
BS00067682_51	0.484375
BS00067698_51	0.06875
BS00067706_51	0.059375
BS00067742_51	0.115625
BS00067744_51	0.48125
BS00067746_51	0.278125
BS00067748_51	0.33125
BS00067769_51	0.16875
BS00067775_51	0.425
BS00067797_51	0.084375
BS00067806_51	0.234375
BS00067873_51	0.184375
BS00067907_51	0.1625
BS00067983_51	0.371875
BS00067985_51	0.05625
BS00068013_51	0.1375
BS00068033_51	0.484375
BS00068050_51	0.44375
BS00068082_51	0.05
BS00068083_51	0.059375
BS00068100_51	0.34375
BS00068106_51	0.04375
BS00068108_51	0.2
BS00068173_51	0.125
BS00068181_51	0.41875
BS00068200_51	0.128125
BS00068245_51	0.4375
BS00068310_51	0.340625
BS00068327_51	0.35
BS00068331_51	0.134375
BS00068358_51	0.128125
BS00068390_51	0.34375
BS00068415_51	0.065625
BS00068435_51	0.465625
BS00068485_51	0.128125
BS00068506_51	0.059375
BS00068556_51	0.303125
BS00068710_51	0.365625
BS00068863_51	0.2875
BS00069116_51	0.38125
BS00069273_51	0.38125
BS00069368_51	0.19375
BS00069412_51	0.109375
BS00069685_51	0.359375
BS00069723_51	0.1125
BS00069756_51	0.165625
BS00069829_51	0.3875
BS00069899_51	0.14375
BS00069980_51	0.090625
BS00070001_51	0.165625
BS00070004_51	0.3875
BS00070005_51	0.43125
BS00070104_51	0.328125
BS00070210_51	0.41875
BS00070285_51	0.11875
BS00070399_51	0.38125
BS00070455_51	0.43125
BS00070507_51	0.303125
BS00070539_51	0.053125
BS00070580_51	0.121875
BS00070626_51	0.203125
BS00070695_51	0.259375
BS00070856_51	0.196875
BS00070861_51	0.078125
BS00070900_51	0.303125
BS00071041_51	0.125
BS00071161_51	0.146875
BS00071424_51	0.48125
BS00071558_51	0.334375
BS00071597_51	0.13125
BS00071690_51	0.165625
BS00071732_51	0.45
BS00071736_51	0.171875
BS00071823_51	0.096875
BS00072025_51	0.121875
BS00072151_51	0.065625
BS00072157_51	0.096875
BS00072791_51	0.28125
BS00072839_51	0.071875
BS00072840_51	0.071875
BS00072941_51	0.378125
BS00072993_51	0.059375
BS00073011_51	0.159375
BS00073015_51	0.41875
BS00073034_51	0.0625
BS00073062_51	0.26875
BS00073132_51	0.34375
BS00073229_51	0.1625
BS00073230_51	0.159375
BS00073413_51	0.071875
BS00073602_51	0.26875
BS00073670_51	0.128125
BS00073879_51	0.309375
BS00073898_51	0.171875
BS00074024_51	0.078125
BS00074083_51	0.325
BS00074120_51	0.075
BS00074121_51	0.075
BS00074183_51	0.134375
BS00074230_51	0.09375
BS00074299_51	0.18125
BS00074301_51	0.225
BS00074315_51	0.1125
BS00074353_51	0.090625
BS00074440_51	0.14375
BS00074780_51	0.284375
BS00074817_51	0.090625
BS00074855_51	0.4375
BS00074926_51	0.25
BS00074962_51	0.059375
BS00074992_51	0.3
BS00075001_51	0.159375
BS00075108_51	0.08125
BS00075233_51	0.1375
BS00075368_51	0.090625
BS00075410_51	0.2125
BS00075505_51	0.375
BS00075524_51	0.39375
BS00075731_51	0.171875
BS00075746_51	0.446875
BS00076033_51	0.2625
BS00076093_51	0.240625
BS00076246_51	0.171875
BS00076261_51	0.196875
BS00076461_51	0.153125
BS00076530_51	0.353125
BS00076693_51	0.278125
BS00076772_51	0.2125
BS00076948_51	0.065625
BS00077131_51	0.153125
BS00077350_51	0.071875
BS00077432_51	0.45625
BS00077448_51	0.10625
BS00077498_51	0.3
BS00077533_51	0.346875
BS00077768_51	0.2875
BS00077769_51	0.2875
BS00077789_51	0.4875
BS00077791_51	0.275
BS00077879_51	0.478125
BS00077891_51	0.103125
BS00077914_51	0.071875
BS00078085_51	0.396875
BS00078098_51	0.225
BS00078242_51	0.084375
BS00078324_51	0.35625
BS00078400_51	0.059375
BS00078413_51	0.43125
BS00078431_51	0.184375
BS00078460_51	0.29375
BS00078522_51	0.290625
BS00078715_51	0.165625
BS00078784_51	0.31875
BS00078982_51	0.21875
BS00079013_51	0.29375
BS00079014_51	0.109375
BS00079029_51	0.06875
BS00079095_51	0.11875
BS00079127_51	0.215625
BS00079189_51	0.428125
BS00079213_51	0.196875
BS00079237_51	0.09375
BS00079321_51	0.284375
BS00079440_51	0.453125
BS00079443_51	0.434375
BS00079521_51	0.271875
BS00079621_51	0.134375
BS00079734_51	0.06875
BS00079989_51	0.484375
BS00080047_51	0.115625
BS00080090_51	0.053125
BS00080239_51	0.478125
BS00080317_51	0.1125
BS00080318_51	0.35625
BS00080621_51	0.09375
BS00080749_51	0.25
BS00080879_51	0.075
BS00080967_51	0.15
BS00081120_51	0.49375
BS00081132_51	0.4375
BS00081189_51	0.059375
BS00081506_51	0.13125
BS00081578_51	0.153125
BS00081610_51	0.284375
BS00081680_51	0.390625
BS00081688_51	0.06875
BS00081724_51	0.146875
BS00081841_51	0.0625
BS00082086_51	0.1875
BS00082180_51	0.19375
BS00082219_51	0.46875
BS00082412_51	0.234375
BS00082460_51	0.478125
BS00082503_51	0.165625
BS00082521_51	0.334375
BS00082605_51	0.215625
BS00082760_51	0.19375
BS00083060_51	0.14375
BS00083078_51	0.1625
BS00083146_51	0.1625
BS00083497_51	0.084375
BS00083511_51	0.203125
BS00083533_51	0.05625
BS00083578_51	0.13125
BS00083630_51	0.0625
BS00083706_51	0.15625
BS00083715_51	0.134375
BS00083918_51	0.09375
BS00083998_51	0.15
BS00084042_51	0.0875
BS00084096_51	0.36875
BS00084106_51	0.4375
BS00084133_51	0.13125
BS00084159_51	0.309375
BS00084193_51	0.196875
BS00084314_51	0.05
BS00084348_51	0.290625
BS00084370_51	0.265625
BS00084607_51	0.096875
BS00084668_51	0.396875
BS00084703_51	0.315625
BS00084895_51	0.046875
BS00084990_51	0.29375
BS00085434_51	0.040625
BS00085589_51	0.0875
BS00085765_51	0.221875
BS00086046_51	0.1625
BS00086050_51	0.23125
BS00086093_51	0.103125
BS00086534_51	0.403125
BS00086679_51	0.05
BS00086717_51	0.05625
BS00087043_51	0.175
BS00087086_51	0.178125
BS00087144_51	0.096875
BS00087178_51	0.1625
BS00087279_51	0.4125
BS00087343_51	0.1125
BS00087437_51	0.31875
BS00087451_51	0.071875
BS00087471_51	0.340625
BS00087600_51	0.25
BS00087696_51	0.171875
BS00087783_51	0.31875
BS00087932_51	0.21875
BS00088756_51	0.39375
BS00089031_51	0.328125
BS00089181_51	0.1375
BS00089283_51	0.29375
BS00089400_51	0.06875
BS00089497_51	0.109375
BS00089524_51	0.134375
BS00089790_51	0.040625
BS00089894_51	0.45
BS00089942_51	0.33125
BS00089954_51	0.10625
BS00089968_51	0.45625
BS00090073_51	0.359375
BS00090253_51	0.353125
BS00090277_51	0.06875
BS00090866_51	0.096875
BS00090940_51	0.309375
BS00090945_51	0.065625
BS00091002_51	0.25
BS00091035_51	0.28125
BS00091068_51	0.334375
BS00091257_51	0.08125
BS00091302_51	0.33125
BS00091519_51	0.3375
BS00091561_51	0.321875
BS00091577_51	0.178125
BS00091666_51	0.30625
BS00091701_51	0.33125
BS00091763_51	0.275
BS00091830_51	0.03125
BS00092197_51	0.465625
BS00092273_51	0.190625
BS00092630_51	0.36875
BS00092631_51	0.140625
BS00092845_51	0.053125
BS00092859_51	0.11875
BS00092869_51	0.259375
BS00092953_51	0.359375
BS00093036_51	0.259375
BS00093078_51	0.134375
BS00093111_51	0.0375
BS00093122_51	0.125
BS00093156_51	0.228125
BS00093201_51	0.13125
BS00093275_51	0.290625
BS00093390_51	0.06875
BS00093588_51	0.1
BS00093740_51	0.059375
BS00093757_51	0.496875
BS00093856_51	0.140625
BS00093857_51	0.115625
BS00093889_51	0.140625
BS00093975_51	0.25
BS00093990_51	0.040625
BS00093993_51	0.30625
BS00094057_51	0.2875
BS00094095_51	0.478125
BS00094172_51	0.36875
BS00094237_51	0.4375
BS00094322_51	0.303125
BS00094342_51	0.33125
BS00094343_51	0.303125
BS00094366_51	0.3375
BS00094480_51	0.3125
BS00094553_51	0.090625
BS00094681_51	0.1125
BS00094770_51	0.25625
BS00094771_51	0.190625
BS00094919_51	0.159375
BS00095061_51	0.065625
BS00095225_51	0.34375
BS00095416_51	0.365625
BS00095510_51	0.415625
BS00095515_51	0.4
BS00095568_51	0.3125
BS00095638_51	0.134375
BS00095640_51	0.140625
BS00095819_51	0.459375
BS00095826_51	0.165625
BS00096024_51	0.06875
BS00096498_51	0.40625
BS00096604_51	0.05
BS00096853_51	0.428125
BS00096882_51	0.078125
BS00096927_51	0.271875
BS00097481_51	0.059375
BS00097939_51	0.18125
BS00098496_51	0.096875
BS00099053_51	0.346875
BS00099074_51	0.140625
BS00099534_51	0.359375
BS00099610_51	0.446875
BS00099700_51	0.340625
BS00099719_51	0.315625
BS00099782_51	0.1875
BS00099794_51	0.1625
BS00099804_51	0.0875
BS00099881_51	0.096875
BS00099986_51	0.196875
BS00100107_51	0.071875
BS00100118_51	0.1375
BS00100178_51	0.05625
BS00100351_51	0.128125
BS00100510_51	0.046875
BS00100563_51	0.39375
BS00100707_51	0.1
BS00100708_51	0.096875
BS00100738_51	0.253125
BS00100774_51	0.20625
BS00100939_51	0.053125
BS00100981_51	0.290625
BS00101364_51	0.090625
BS00101401_51	0.14375
BS00101408_51	0.134375
BS00101500_51	0.065625
BS00101512_51	0.25
BS00102182_51	0.4
BS00102492_51	0.0375
BS00102622_51	0.06875
BS00102641_51	0.325
BS00102646_51	0.209375
BS00102772_51	0.35
BS00102773_51	0.365625
BS00102828_51	0.05
BS00103275_51	0.075
BS00103461_51	0.184375
BS00103625_51	0.175
BS00103682_51	0.134375
BS00103846_51	0.378125
BS00104270_51	0.2625
BS00104279_51	0.225
BS00104364_51	0.240625
BS00104432_51	0.38125
BS00104667_51	0.390625
BS00105308_51	0.125
BS00105522_51	0.1125
BS00105531_51	0.196875
BS00105601_51	0.21875
BS00105606_51	0.059375
BS00105791_51	0.440625
BS00105800_51	0.23125
BS00105833_51	0.4
BS00105846_51	0.35625
BS00105877_51	0.1125
BS00105878_51	0.084375
BS00105995_51	0.44375
BS00106008_51	0.425
BS00106142_51	0.303125
BS00106144_51	0.2125
BS00106545_51	0.053125
BS00106571_51	0.125
BS00106588_51	0.325
BS00106641_51	0.33125
BS00106695_51	0.1875
BS00106937_51	0.165625
BS00107069_51	0.303125
BS00107444_51	0.059375
BS00107555_51	0.296875
BS00107749_51	0.359375
BS00107804_51	0.18125
BS00107837_51	0.096875
BS00108019_51	0.190625
BS00108020_51	0.2125
BS00108055_51	0.203125
BS00108062_51	0.2875
BS00108305_51	0.428125
BS00108573_51	0.434375
BS00108577_51	0.165625
BS00108733_51	0.24375
BS00108784_51	0.178125
BS00108793_51	0.259375
BS00109036_51	0.4125
BS00109052_51	0.103125
BS00109319_51	0.4625
BS00109560_51	0.2
BS00109717_51	0.10625
BS00109736_51	0.26875
BS00109813_51	0.05625
BS00109912_51	0.190625
BS00109913_51	0.071875
BS00109991_51	0.10625
BS00109999_51	0.084375
BS00110072_51	0.053125
BS00110075_51	0.25625
BS00110104_51	0.128125
BS00110121_51	0.253125
BS00110128_51	0.378125
BS00110130_51	0.1375
BS00110231_51	0.428125
BS00110266_51	0.05625
BS00110292_51	0.090625
BS00110319_51	0.196875
BS00110405_51	0.146875
BS00110442_51	0.196875
BS00110489_51	0.04375
BS00110490_51	0.3375
BS00110512_51	0.4125
BS00110528_51	0.19375
BS00110564_51	0.19375
BS00110587_51	0.40625
BS00110627_51	0.10625
BS00110642_51	0.096875
BS00110681_51	0.221875
BS00110940_51	0.175
BS00111016_51	0.35
BS00111112_51	0.190625
BS00111120_51	0.20625
BS00111144_51	0.184375
BS00111247_51	0.065625
BS00111294_51	0.0875
CAP11_c1048_99	0.2
CAP11_c1051_121	0.24375
CAP11_c106_97	0.3625
CAP11_c1206_301	0.1625
CAP11_c1661_59	0.4625
CAP11_c1820_244	0.1875
CAP11_c2194_115	0.11875
CAP11_c2293_200	0.0625
CAP11_c2683_177	0.328125
CAP11_c2941_210	0.409375
CAP11_c2974_53	0.265625
CAP11_c2984_419	0.0375
CAP11_c3138_241	0.11875
CAP11_c315_247	0.303125
CAP11_c3209_76	0.06875
CAP11_c3218_126	0.165625
CAP11_c3464_68	0.165625
CAP11_c3591_72	0.43125
CAP11_c3827_198	0.103125
CAP11_c3942_361	0.484375
CAP11_c5598_321	0.146875
CAP11_c5660_100	0.053125
CAP11_c59_418	0.375
CAP11_c601_120	0.334375
CAP11_c6014_160	0.2625
CAP11_c896_88	0.075
CAP11_c989_113	0.403125
CAP11_c991_160	0.384375
CAP11_rep_c5039_201	0.125
CAP11_rep_c5191_192	0.109375
CAP11_rep_c8279_82	0.21875
CAP12_c1085_283	0.078125
CAP12_c1129_220	0.171875
CAP12_c1468_114	0.465625
CAP12_c1503_76	0.040625
CAP12_c1587_142	0.190625
CAP12_c1816_325	0.115625
CAP12_c1906_217	0.275
CAP12_c194_240	0.25
CAP12_c2009_335	0.04375
CAP12_c2231_114	0.065625
CAP12_c2472_60	0.096875
CAP12_c2565_239	0.45
CAP12_c259_307	0.04375
CAP12_c2615_128	0.14375
CAP12_c2972_140	0.26875
CAP12_c2978_93	0.090625
CAP12_c3074_192	0.171875
CAP12_c3551_85	0.153125
CAP12_c4778_199	0.20625
CAP12_c575_105	0.41875
CAP12_c6044_69	0.259375
CAP12_c6266_298	0.215625
CAP12_c6266_339	0.228125
CAP12_c703_150	0.1625
CAP12_c8025_110	0.15
CAP12_c8163_118	0.303125
CAP12_rep_c3868_270	0.259375
CAP12_rep_c4571_181	0.153125
CAP12_rep_c5547_123	0.26875
CAP12_rep_c6956_169	0.265625
CAP12_s9114_61	0.171875
CAP7_c10038_214	0.16875
CAP7_c10133_40	0.28125
CAP7_c10772_156	0.45625
CAP7_c10833_215	0.38125
CAP7_c10839_300	0.196875
CAP7_c1155_57	0.3125
CAP7_c11553_123	0.125
CAP7_c12162_251	0.1125
CAP7_c1241_128	0.184375
CAP7_c12484_228	0.06875
CAP7_c16_483	0.275
CAP7_c1933_170	0.1625
CAP7_c2381_149	0.396875
CAP7_c2559_543	0.153125
CAP7_c2649_283	0.2875
CAP7_c2695_75	0.128125
CAP7_c3438_196	0.359375
CAP7_c3667_77	0.434375
CAP7_c3697_87	0.09375
CAP7_c3814_303	0.271875
CAP7_c3847_204	0.4375
CAP7_c3885_73	0.290625
CAP7_c3916_256	0.06875
CAP7_c3950_160	0.05625
CAP7_c4056_108	0.35625
CAP7_c4064_162	0.35
CAP7_c4283_232	0.228125
CAP7_c4827_53	0.096875
CAP7_c4833_141	0.2125
CAP7_c5481_96	0.0875
CAP7_c6223_318	0.1875
CAP7_c6528_99	0.1875
CAP7_c7296_88	0.284375
CAP7_c7415_267	0.0625
CAP7_c756_531	0.065625
CAP7_c8713_356	0.45625
CAP7_c915_121	0.40625
CAP7_rep_c12929_169	0.059375
CAP7_rep_c6352_375	0.1625
CAP7_rep_c8019_110	0.1
CAP8_c1066_309	0.465625
CAP8_c1305_148	0.11875
CAP8_c1393_327	0.1375
CAP8_c145_89	0.165625
CAP8_c1799_237	0.121875
CAP8_c1801_231	0.075
CAP8_c195_441	0.075
CAP8_c2014_192	0.05
CAP8_c2401_433	0.328125
CAP8_c2448_355	0.075
CAP8_c2843_226	0.209375
CAP8_c3129_381	0.19375
CAP8_c3273_136	0.26875
CAP8_c3568_256	0.09375
CAP8_c4697_108	0.090625
CAP8_c5043_190	0.290625
CAP8_c5043_351	0.18125
CAP8_c665_242	0.215625
CAP8_c6799_93	0.2625
CAP8_c806_297	0.04375
CAP8_c818_370	0.3875
CAP8_c909_312	0.2375
CAP8_c9110_427	0.09375
CAP8_rep_c3781_99	0.0875
CAP8_rep_c4453_136	0.159375
CAP8_rep_c4852_130	0.25
CAP8_rep_c8022_270	0.125
CAP8_rep_c8162_101	0.25625
CAP8_rep_c9642_82	0.109375
D_contig03023_692	0.209375
D_contig05962_325	0.0875
D_contig06122_208	0.1375
D_contig12192_450	0.046875
D_contig13475_402	0.171875
D_contig14237_449	0.325
D_contig14507_369	0.196875
D_contig16934_681	0.09375
D_contig17313_245	0.296875
D_contig23076_255	0.071875
D_contig25212_98	0.36875
D_contig25392_201	0.346875
D_contig26362_1277	0.271875
D_contig27392_286	0.14375
D_contig31797_313	0.13125
D_contig36176_338	0.09375
D_contig39379_541	0.23125
D_contig52360_374	0.1625
D_contig59199_227	0.196875
D_contig73920_552	0.4875
D_contig77859_59	0.23125
D_contig78519_72	0.10625
D_contig79290_372	0.065625
D_contig79410_237	0.1
D_contig80448_280	0.465625
D_F1BEJMU01A0OMY_356	0.1
D_F1BEJMU01DOR77_203	0.2375
D_F1BEJMU02GB94Z_188	0.0625
D_F5XZDLF01A85DT_301	0.271875
D_F5XZDLF01B7ECX_54	0.10625
D_F5XZDLF01ELZ49_220	0.08125
D_F5XZDLF02G9H4M_286	0.434375
D_F5XZDLF02H192C_184	0.078125
D_GA8KES401AVZF3_380	0.0625
D_GA8KES401DISTP_65	0.478125
D_GA8KES401EYUM8_190	0.159375
D_GA8KES402JVT1Y_74	0.303125
D_GB5Y7FA02H01X6_191	0.16875
D_GB5Y7FA02HBLTO_213	0.15625
D_GB5Y7FA02I369B_378	0.1125
D_GB5Y7FA02IDDA9_183	0.140625
D_GB5Y7FA02JRQ1I_101	0.1
D_GBB4FNX02FX302_98	0.28125
D_GBF1XID01A16U2_148	0.121875
D_GBF1XID01DNWRS_378	0.084375
D_GBF1XID01ETBRB_172	0.11875
D_GBUVHFX01ANH44_230	0.053125
D_GBUVHFX02FY8QG_158	0.30625
D_GBUVHFX02JKG4A_54	0.08125
D_GCE8AKX02IXEFJ_281	0.134375
D_GCE8AKX02J2BYY_249	0.225
D_GDEEGVY01AU4CW_149	0.05625
D_GDEEGVY01C7BQU_446	0.13125
D_GDEEGVY01CO81T_81	0.259375
D_GDRF1KQ02JPR1A_106	0.10625
D_GDS7LZN01CBWNE_99	0.253125
D_GDS7LZN01CWBG5_74	0.26875
D_GDS7LZN01DU929_63	0.240625
D_GDS7LZN02F0W89_230	0.14375
D_GDS7LZN02F4FP5_176	0.478125
D_GDS7LZN02FDZX8_269	0.303125
D_GDS7LZN02I3554_251	0.13125
D_GDS7LZN02IXNP1_255	0.403125
Ex_c102862_798	0.128125
Ex_c11348_1256	0.340625
Ex_c1145_552	0.14375
Ex_c12057_797	0.446875
Ex_c12134_939	0.25625
Ex_c12584_2014	0.065625
Ex_c12763_662	0.2375
Ex_c1334_889	0.359375
Ex_c13534_401	0.4875
Ex_c1583_1138	0.1375
Ex_c1583_1688	0.134375
Ex_c16948_754	0.196875
Ex_c17894_1159	0.071875
Ex_c18484_2026	0.190625
Ex_c18484_2048	0.18125
Ex_c19516_3687	0.05625
Ex_c2171_2600	0.25625
Ex_c23426_1546	0.128125
Ex_c23451_720	0.04375
Ex_c2389_1634	0.04375
Ex_c24379_1031	0.390625
Ex_c24477_484	0.23125
Ex_c25027_535	0.215625
Ex_c2510_477	0.1
Ex_c25390_395	0.215625
Ex_c25467_851	0.290625
Ex_c2571_987	0.109375
Ex_c25733_348	0.053125
Ex_c2725_1442	0.2125
Ex_c27573_760	0.059375
Ex_c28329_716	0.159375
Ex_c28973_935	0.125
Ex_c29928_1020	0.3875
Ex_c31468_763	0.28125
Ex_c32540_659	0.046875
Ex_c39052_1533	0.3375
Ex_c40520_1484	0.05625
Ex_c4206_502	0.059375
Ex_c4208_839	0.49375
Ex_c42133_630	0.134375
Ex_c5168_849	0.46875
Ex_c52711_584	0.209375
Ex_c5317_662	0.33125
Ex_c54863_29	0.134375
Ex_c55735_1012	0.4375
Ex_c5594_2818	0.11875
Ex_c5740_1133	0.296875
Ex_c5759_628	0.2625
Ex_c5759_663	0.240625
Ex_c5902_360	0.496875
Ex_c5979_1449	0.265625
Ex_c64327_523	0.05625
Ex_c66324_1151	0.334375
Ex_c66350_301	0.15625
Ex_c67202_741	0.203125
Ex_c67794_487	0.071875
Ex_c69054_723	0.278125
Ex_c7086_154	0.49375
Ex_c721_2127	0.30625
Ex_c721_2374	0.328125
Ex_c7227_53	0.3875
Ex_c7593_754	0.175
Ex_c801_555	0.04375
Ex_c801_820	0.040625
Ex_c8179_1452	0.428125
Ex_c8514_1342	0.140625
Ex_c883_2618	0.0875
Ex_c9296_605	0.275
Ex_c9543_935	0.146875
Ex_c95453_1499	0.321875
Ex_c9556_2547	0.4625
Ex_c9615_1202	0.3
Ex_c9615_574	0.30625
Excalibur_c100270_78	0.30625
Excalibur_c100910_239	0.175
Excalibur_c10167_1028	0.15
Excalibur_c1027_927	0.471875
Excalibur_c10319_229	0.0625
Excalibur_c10444_2056	0.140625
Excalibur_c10496_651	0.16875
Excalibur_c105074_293	0.1625
Excalibur_c10568_826	0.059375
Excalibur_c10637_515	0.353125
Excalibur_c10657_796	0.153125
Excalibur_c10669_997	0.084375
Excalibur_c11133_209	0.43125
Excalibur_c113078_320	0.3375
Excalibur_c113341_139	0.159375
Excalibur_c11437_75	0.071875
Excalibur_c11578_324	0.490625
Excalibur_c11588_406	0.121875
Excalibur_c11605_156	0.209375
Excalibur_c11941_675	0.296875
Excalibur_c11947_746	0.184375
Excalibur_c11980_619	0.05625
Excalibur_c1205_188	0.384375
Excalibur_c1208_72	0.253125
Excalibur_c12085_276	0.125
Excalibur_c12135_100	0.15625
Excalibur_c12169_1088	0.228125
Excalibur_c12177_285	0.23125
Excalibur_c12215_352	0.128125
Excalibur_c12332_161	0.303125
Excalibur_c12376_569	0.05625
Excalibur_c12395_467	0.184375
Excalibur_c12482_901	0.0875
Excalibur_c12675_1147	0.21875
Excalibur_c12703_766	0.175
Excalibur_c12875_864	0.334375
Excalibur_c12932_2102	0.28125
Excalibur_c12980_2392	0.375
Excalibur_c12996_775	0.453125
Excalibur_c13046_700	0.2875
Excalibur_c13094_523	0.478125
Excalibur_c1310_414	0.10625
Excalibur_c13239_85	0.334375
Excalibur_c13242_1178	0.359375
Excalibur_c13276_1322	0.26875
Excalibur_c13337_219	0.29375
Excalibur_c1353_1364	0.446875
Excalibur_c13709_2568	0.05
Excalibur_c13811_1086	0.265625
Excalibur_c14201_111	0.303125
Excalibur_c14222_179	0.265625
Excalibur_c14273_1407	0.090625
Excalibur_c14401_743	0.415625
Excalibur_c1451_660	0.275
Excalibur_c14803_1088	0.31875
Excalibur_c14859_394	0.171875
Excalibur_c14925_1747	0.15625
Excalibur_c14943_695	0.221875
Excalibur_c14999_712	0.21875
Excalibur_c15009_1082	0.265625
Excalibur_c15029_144	0.26875
Excalibur_c15031_73	0.25625
Excalibur_c15048_488	0.0625
Excalibur_c15095_831	0.125
Excalibur_c15095_852	0.125
Excalibur_c15098_591	0.221875
Excalibur_c1529_1644	0.303125
Excalibur_c15332_1194	0.271875
Excalibur_c15335_197	0.159375
Excalibur_c15411_643	0.303125
Excalibur_c15426_661	0.315625
Excalibur_c15692_532	0.13125
Excalibur_c15696_1280	0.234375
Excalibur_c15733_252	0.396875
Excalibur_c15744_322	0.259375
Excalibur_c15844_1470	0.146875
Excalibur_c16135_253	0.078125
Excalibur_c16144_185	0.053125
Excalibur_c16197_748	0.05
Excalibur_c16329_493	0.109375
Excalibur_c16355_712	0.11875
Excalibur_c16566_485	0.115625
Excalibur_c16569_535	0.084375
Excalibur_c16569_765	0.159375
Excalibur_c16646_1254	0.20625
Excalibur_c16662_300	0.05625
Excalibur_c16703_430	0.11875
[truncated: 5,403 more rows]
