# Supplementary material for: Genome-Wide Association Analysis of Freezing Tolerance and Winter Hardiness in Winter Wheat of Nordic Origin
Source: Plants (Basel). 2023 Nov 29;12(23):4014. doi: 10.3390/plants12234014 (PMC10708462; doi:10.3390/plants12234014)
Supplement: Supplementary file 1 [file plants-12-04014-s001.zip › Table S4.xlsx]

## Sheet: Supplementary Table 4
Table S4. A kinship matrix of 160 winter wheat cultivars and landraces of Nordic origin, used to assess freezing tolerance (FT) under controlled conditions.
		Iduna	Äring II	Starke II-LR	Eroica	Pansar I	Ergo II	Konge III	Virtus	NGB13442	NGB13444	Ångermanland	Tystofte Smaahvede	Stava	Urban	Björke	Aros	Gunbo	Mjölner	Rental	Stava	Rudolf Rubin	S-5	Eroica II	Kirsten	Lone	Brandt	Karat	Arlo	Banco	Saxild	Abba	Konsul	Probat	Stakado	Ertus	Sampo	Väinö	Pitkävihneinen maatiainen	Kökar	Starke	Olympia	Trond	Standard	Thor	Norre	Otso	Starke II	Holme
		NGB1	NGB10	NGB11425	NGB12	NGB12242	NGB12243	NGB12244	NGB13	NGB13442	NGB13444	NGB13445	NGB13446	NGB13479	NGB13576	NGB13659	NGB14	NGB14114	NGB14115	NGB14116	NGB14117	NGB14118	NGB14286	NGB15	NGB15070	NGB15071	NGB15072	NGB15075	NGB15076	NGB16	NGB16675	NGB16679	NGB16852	NGB16909	NGB16910	NGB17	NGB17135	NGB17137	NGB17141	NGB17142	NGB18	NGB18629	NGB19	NGB2	NGB20	NGB21	NGB21864	NGB22	NGB23
Iduna	NGB1	1.08282	0.639648	0.490353	0.729986	0.642998	0.575843	0.497106	0.460081	0.334347	0.234396	0.174038	0.326631	0.384004	0.280901	0.219583	0.556371	0.419211	0.340928	0.428001	0.384833	0.482311	0.110313	0.579068	0.203902	0.186701	0.186739	0.294963	0.267452	0.516901	0.20837	0.246617	0.326703	0.154843	0.216738	0.478644	0.343136	0.22615	0.253334	0.492839	0.52165	0.220127	0.70511	0.73468	0.703939	0.456894	0.31665	0.49494	0.447162
Äring II	NGB10	0.639648	1.11294	0.595324	0.662973	0.466756	0.524847	0.448474	0.430616	0.233988	0.259546	0.196825	0.267233	0.480311	0.323118	0.314576	0.630359	0.518931	0.49605	0.436346	0.480089	0.584131	0.253882	0.621284	0.311762	0.287471	0.217928	0.272587	0.22092	0.609794	0.26923	0.275968	0.376009	0.186295	0.325648	0.562084	0.331264	0.31773	0.223869	0.527704	0.607454	0.234512	0.506287	0.478354	0.505641	0.520379	0.342062	0.599911	0.536642
Starke II-LR	NGB11425	0.490353	0.595324	1.10199	0.60374	0.38573	0.486095	0.418124	0.467221	0.204426	0.234185	0.115273	0.253687	0.824912	0.288042	0.276086	0.922708	0.927074	0.734047	0.567739	0.824427	1.05424	0.267906	0.755041	0.234936	0.237428	0.138477	0.239874	0.227067	0.848842	0.179801	0.203606	0.432044	0.116034	0.211275	0.698467	0.231332	0.230402	0.153608	0.92692	1.12666	0.176592	0.501407	0.481613	0.501285	0.870757	0.275215	1.20577	0.940847
Eroica	NGB12	0.729986	0.662973	0.60374	0.937153	0.562608	0.538515	0.491024	0.505987	0.296231	0.257459	0.209967	0.300067	0.487939	0.276131	0.270215	0.622233	0.524721	0.467181	0.473645	0.488505	0.593072	0.251007	0.746544	0.237205	0.22263	0.207438	0.302271	0.238525	0.679652	0.190997	0.280445	0.314581	0.19366	0.244264	0.54293	0.325238	0.271006	0.283749	0.58102	0.602478	0.246866	0.622357	0.634335	0.622236	0.529058	0.297701	0.603863	0.535343
Pansar I	NGB12242	0.642998	0.466756	0.38573	0.562608	1.13312	0.3977	0.663981	0.328938	0.254931	0.306483	0.144247	0.284762	0.347125	0.33277	0.230753	0.452798	0.371304	0.268338	0.347534	0.347428	0.377425	0.179249	0.434534	0.229251	0.243034	0.285083	0.392782	0.260767	0.42882	0.307239	0.3061	0.301376	0.24636	0.343965	0.426798	0.286039	0.272242	0.250851	0.359596	0.382368	0.181935	0.474716	0.489057	0.47512	0.383517	0.244848	0.387954	0.377461
Ergo II	NGB12243	0.575843	0.524847	0.486095	0.538515	0.3977	1.1301	0.348434	0.680846	0.519928	0.267948	0.583066	0.443943	0.375283	0.379571	0.390459	0.612504	0.394735	0.491061	0.287994	0.376373	0.507461	0.260709	0.5391	0.187303	0.193209	0.180118	0.299107	0.23011	0.544152	0.258727	0.317717	0.271506	0.242222	0.248715	0.581252	0.458348	0.484988	0.425786	0.500397	0.49061	0.508898	0.461388	0.475991	0.460741	0.462614	0.25909	0.492257	0.43634
Konge III	NGB12244	0.497106	0.448474	0.418124	0.491024	0.663981	0.348434	0.98026	0.35398	0.185184	0.362246	0.0865793	0.346563	0.389759	0.464416	0.295181	0.432415	0.395032	0.325676	0.452135	0.389274	0.417696	0.271509	0.477955	0.322036	0.343434	0.339007	0.340628	0.345938	0.444147	0.339896	0.423042	0.376306	0.324179	0.389224	0.420856	0.25489	0.292558	0.243071	0.40223	0.415549	0.169954	0.499758	0.486529	0.500424	0.382827	0.398812	0.417722	0.406704
Virtus	NGB13	0.460081	0.430616	0.467221	0.505987	0.328938	0.680846	0.35398	1.12683	0.530725	0.265354	0.607517	0.464717	0.382929	0.347044	0.586631	0.546368	0.38689	0.559886	0.32531	0.383494	0.480973	0.368394	0.456684	0.163966	0.184838	0.161769	0.277083	0.185504	0.447295	0.18944	0.234776	0.2269	0.199192	0.279467	0.553976	0.579425	0.734987	0.50065	0.520121	0.467798	0.517857	0.483738	0.510682	0.483091	0.397002	0.26411	0.47811	0.384645
NGB13442	NGB13442	0.334347	0.233988	0.204426	0.296231	0.254931	0.519928	0.185184	0.530725	1.72332	0.302677	1.00141	0.411453	0.204681	0.276449	0.503959	0.263354	0.230435	0.351705	0.16518	0.206034	0.24916	0.543566	0.285	0.251177	0.238702	0.226662	0.400003	0.24672	0.258019	0.529244	0.352708	0.26291	0.360186	0.293158	0.247331	0.619635	0.791477	0.942857	0.348175	0.237823	1.00654	0.277132	0.266266	0.276748	0.242123	0.303271	0.211901	0.247096
NGB13444	NGB13444	0.234396	0.259546	0.234185	0.257459	0.306483	0.267948	0.362246	0.265354	0.302677	1.27612	0.237418	0.639715	0.355485	0.623394	0.517176	0.230621	0.331613	0.384878	0.48718	0.355	0.266053	0.555733	0.250429	0.805552	0.925413	0.930177	0.734082	0.818951	0.238152	0.573181	0.692037	0.662894	0.802706	0.681589	0.276828	0.278382	0.274826	0.349011	0.253213	0.229772	0.385647	0.263304	0.271344	0.263445	0.290787	0.627372	0.235095	0.291821
Ångermanland	NGB13445	0.174038	0.196825	0.115273	0.209967	0.144247	0.583066	0.0865793	0.607517	1.00141	0.237418	1.6734	0.440457	0.175132	0.227208	0.599919	0.229866	0.11345	0.258352	0.0849544	0.176748	0.15003	0.399274	0.224993	0.206136	0.186835	0.241487	0.339208	0.219272	0.217967	0.470024	0.310818	0.168506	0.328799	0.340805	0.265307	1.01886	0.87956	0.825609	0.221475	0.121888	0.970951	0.224214	0.238555	0.223568	0.184742	0.22961	0.113296	0.127485
Tystofte Smaahvede	NGB13446	0.326631	0.267233	0.253687	0.300067	0.284762	0.443943	0.346563	0.464717	0.411453	0.639715	0.440457	1.61304	0.309869	0.668103	0.699997	0.270604	0.316719	0.369721	0.353078	0.309647	0.244332	0.582325	0.333736	0.584802	0.517713	0.540857	0.37627	0.677497	0.288112	0.453521	0.500433	0.347356	0.607425	0.399922	0.325738	0.353549	0.381239	0.390569	0.308425	0.27133	0.436133	0.351075	0.357276	0.350954	0.299524	0.399007	0.263	0.310798
Stava	NGB13479	0.384004	0.480311	0.824912	0.487939	0.347125	0.375283	0.389759	0.382929	0.204681	0.355485	0.175132	0.309869	1.21874	0.400414	0.288157	0.691901	1.04076	0.741917	0.552765	1.38947	0.816082	0.428067	0.583575	0.312912	0.325382	0.212514	0.265861	0.325523	0.688929	0.268805	0.265303	0.494529	0.196373	0.255904	0.660912	0.283314	0.240897	0.23526	0.751515	0.830477	0.222271	0.4137	0.398108	0.413054	0.889917	0.282822	0.844728	0.888325
Urban	NGB13576	0.280901	0.323118	0.288042	0.276131	0.33277	0.379571	0.464416	0.347044	0.276449	0.623394	0.227208	0.668103	0.400414	1.59329	0.573659	0.232489	0.377068	0.391472	0.452288	0.399405	0.318072	0.466752	0.362315	0.43667	0.559157	0.516658	0.436357	0.65041	0.355288	0.58634	0.624062	0.410331	0.556182	0.478126	0.361931	0.213032	0.298225	0.443041	0.339891	0.277065	0.361521	0.211608	0.207569	0.211486	0.355935	0.494278	0.281863	0.343315
Björke	NGB13659	0.219583	0.314576	0.276086	0.270215	0.230753	0.390459	0.295181	0.586631	0.503959	0.517176	0.599919	0.699997	0.288157	0.573659	1.73498	0.299043	0.227788	0.35326	0.273338	0.28846	0.302966	0.611026	0.314387	0.554687	0.511492	0.587938	0.398407	0.410806	0.316026	0.609569	0.663045	0.363191	0.651618	0.416808	0.357327	0.457346	0.601092	0.563684	0.358657	0.286378	0.608986	0.243502	0.234212	0.244431	0.230549	0.431122	0.290651	0.229745
Aros	NGB14	0.556371	0.630359	0.922708	0.622233	0.452798	0.612504	0.432415	0.546368	0.263354	0.230621	0.229866	0.270604	0.691901	0.232489	0.299043	1.08774	0.749426	0.60445	0.543696	0.692204	0.886833	0.219968	0.70369	0.235049	0.240167	0.137802	0.275434	0.189894	0.771233	0.150506	0.217373	0.403012	0.133213	0.227929	0.685451	0.337523	0.333442	0.200721	0.754786	0.918821	0.176442	0.551408	0.536866	0.551286	0.746936	0.286355	0.941999	0.741143
Gunbo	NGB14114	0.419211	0.518931	0.927074	0.524721	0.371304	0.394735	0.395032	0.38689	0.230435	0.331613	0.11345	0.316719	1.04076	0.377068	0.227788	0.749426	1.17043	0.759269	0.631297	1.03975	0.896714	0.371637	0.579134	0.320024	0.331706	0.200984	0.231224	0.336574	0.674247	0.269353	0.209135	0.538401	0.196395	0.241486	0.652269	0.212442	0.198383	0.216903	0.885974	0.918198	0.204964	0.477528	0.449332	0.477144	0.944554	0.31409	0.946102	0.945588
Mjölner	NGB14115	0.340928	0.49605	0.734047	0.467181	0.268338	0.491061	0.325676	0.559886	0.351705	0.384878	0.258352	0.369721	0.741917	0.391472	0.35326	0.60445	0.759269	1.29707	0.495773	0.741695	0.747799	0.373962	0.493498	0.333115	0.390485	0.293896	0.257444	0.372771	0.549226	0.388785	0.349836	0.518933	0.343923	0.355666	0.630964	0.274371	0.387659	0.306139	0.671416	0.742501	0.34724	0.445982	0.447982	0.44481	0.746276	0.326919	0.743623	0.785382
Rental	NGB14116	0.428001	0.436346	0.567739	0.473645	0.347534	0.287994	0.452135	0.32531	0.16518	0.48718	0.0849544	0.353078	0.552765	0.452288	0.273338	0.543696	0.631297	0.495773	1.38502	0.552281	0.560222	0.34104	0.486571	0.597949	0.567094	0.583411	0.537244	0.621587	0.487421	0.341684	0.499401	0.519883	0.505828	0.554594	0.458091	0.221232	0.152821	0.193659	0.495918	0.548885	0.158351	0.435378	0.446043	0.434732	0.526928	0.687065	0.5676	0.534527
Stava	NGB14117	0.384833	0.480089	0.824427	0.488505	0.347428	0.376373	0.389274	0.383494	0.206034	0.355	0.176748	0.309647	1.38947	0.399405	0.28846	0.692204	1.03975	0.741695	0.552281	1.2188	0.81586	0.42837	0.584403	0.313215	0.325685	0.212292	0.266689	0.324776	0.689232	0.268845	0.264556	0.494044	0.196676	0.255682	0.660952	0.28493	0.2412	0.237139	0.751818	0.83078	0.222837	0.412953	0.397361	0.412307	0.889432	0.282337	0.844506	0.888103
Rudolf Rubin	NGB14118	0.482311	0.584131	1.05424	0.593072	0.377425	0.507461	0.417696	0.480973	0.24916	0.266053	0.15003	0.244332	0.816082	0.318072	0.302966	0.886833	0.896714	0.747799	0.560222	0.81586	1.12358	0.254087	0.677418	0.241336	0.247241	0.165094	0.282508	0.217187	0.774632	0.14944	0.207905	0.469427	0.15893	0.206121	0.707229	0.237732	0.276712	0.202282	0.867676	1.02488	0.203734	0.495202	0.464644	0.495081	0.92048	0.296318	1.07432	0.941732
S-5	NGB14286	0.110313	0.253882	0.267906	0.251007	0.179249	0.260709	0.271509	0.368394	0.543566	0.555733	0.399274	0.582325	0.428067	0.466752	0.611026	0.219968	0.371637	0.373962	0.34104	0.42837	0.254087	2	0.281788	0.713765	0.677659	0.679272	0.543305	0.456453	0.31546	0.71797	0.508876	0.466078	0.823299	0.525472	0.305035	0.297137	0.624683	0.679175	0.342862	0.269533	0.659359	0.278121	0.25859	0.278525	0.297464	0.585473	0.262778	0.369129
Eroica II	NGB15	0.579068	0.621284	0.755041	0.746544	0.434534	0.5391	0.477955	0.456684	0.285	0.250429	0.224993	0.333736	0.583575	0.362315	0.314387	0.70369	0.579134	0.493498	0.486571	0.584403	0.677418	0.281788	1.09824	0.297394	0.274942	0.236906	0.346968	0.246462	1.0628	0.211538	0.303086	0.351138	0.221028	0.225157	0.597605	0.294315	0.32358	0.252038	0.655125	0.732773	0.285787	0.505573	0.481054	0.505714	0.569028	0.278594	0.734421	0.635705
Kirsten	NGB15070	0.203902	0.311762	0.234936	0.237205	0.229251	0.187303	0.322036	0.163966	0.251177	0.805552	0.206136	0.584802	0.312912	0.43667	0.554687	0.235049	0.320024	0.333115	0.597949	0.313215	0.241336	0.713765	0.297394	1.71014	1.49174	1.20033	0.718292	0.854099	0.269624	0.65428	0.862147	0.990283	1.28974	0.811788	0.247909	0.268893	0.282142	0.33112	0.229545	0.229473	0.262991	0.253028	0.235335	0.252644	0.215919	0.85656	0.232696	0.310953
Lone	NGB15071	0.186701	0.287471	0.237428	0.22263	0.243034	0.193209	0.343434	0.184838	0.238702	0.925413	0.186835	0.517713	0.325382	0.559157	0.511492	0.240167	0.331706	0.390485	0.567094	0.325685	0.247241	0.677659	0.274942	1.49174	1.7959	1.37113	0.881214	0.872083	0.274742	0.740007	0.80241	0.986211	1.19219	0.782771	0.249613	0.259833	0.2505	0.323897	0.241228	0.263737	0.278349	0.274163	0.249118	0.274041	0.226288	0.817828	0.24254	0.312132
Brandt	NGB15072	0.186739	0.217928	0.138477	0.207438	0.285083	0.180118	0.339007	0.161769	0.226662	0.930177	0.241487	0.540857	0.212514	0.516658	0.587938	0.137802	0.200984	0.293896	0.583411	0.212292	0.165094	0.679272	0.236906	1.20033	1.37113	1.78367	0.928515	0.908355	0.212288	0.742145	0.914828	0.847086	1.35292	0.884949	0.206064	0.268797	0.258415	0.314482	0.128622	0.13564	0.288889	0.227463	0.219223	0.227866	0.159107	0.848849	0.142801	0.170907
Karat	NGB15075	0.294963	0.272587	0.239874	0.302271	0.392782	0.299107	0.340628	0.277083	0.400003	0.734082	0.339208	0.37627	0.265861	0.436357	0.398407	0.275434	0.231224	0.257444	0.537244	0.266689	0.282508	0.543305	0.346968	0.718292	0.881214	0.928515	1.74261	0.708847	0.347557	0.62981	0.685386	0.545437	0.780038	0.711435	0.280417	0.357066	0.378717	0.562394	0.242885	0.227847	0.490064	0.222782	0.241849	0.22266	0.1967	0.602603	0.236321	0.226354
Arlo	NGB15076	0.267452	0.22092	0.227067	0.238525	0.260767	0.23011	0.345938	0.185504	0.24672	0.818951	0.219272	0.677497	0.325523	0.65041	0.410806	0.189894	0.336574	0.372771	0.621587	0.324776	0.217187	0.456453	0.246462	0.854099	0.872083	0.908355	0.708847	1.6661	0.228408	0.743036	0.692009	0.765005	0.738085	0.722521	0.288615	0.23713	0.203903	0.287803	0.227452	0.216877	0.29687	0.292421	0.302561	0.29335	0.289971	0.779897	0.215374	0.259759
Banco	NGB16	0.516901	0.609794	0.848842	0.679652	0.42882	0.544152	0.444147	0.447295	0.258019	0.238152	0.217967	0.288112	0.688929	0.355288	0.316026	0.771233	0.674247	0.549226	0.487421	0.689232	0.774632	0.31546	1.0628	0.269624	0.274742	0.212288	0.347557	0.228408	1.05682	0.231031	0.284769	0.361441	0.202185	0.233622	0.695344	0.301467	0.313928	0.236872	0.723456	0.834451	0.288738	0.454435	0.434904	0.454839	0.695125	0.271305	0.836361	0.745785
Saxild	NGB16675	0.20837	0.26923	0.179801	0.190997	0.307239	0.258727	0.339896	0.18944	0.529244	0.573181	0.470024	0.453521	0.268805	0.58634	0.609569	0.150506	0.269353	0.388785	0.341684	0.268845	0.14944	0.71797	0.211538	0.65428	0.740007	0.742145	0.62981	0.743036	0.231031	1.79669	0.674414	0.58199	0.665087	0.605412	0.257628	0.345306	0.489052	0.52779	0.201717	0.197969	0.589633	0.23544	0.240854	0.236369	0.256359	0.60686	0.179136	0.255817
Abba	NGB16679	0.246617	0.275968	0.203606	0.280445	0.3061	0.317717	0.423042	0.234776	0.352708	0.692037	0.310818	0.500433	0.265303	0.624062	0.663045	0.217373	0.209135	0.349836	0.499401	0.264556	0.207905	0.508876	0.303086	0.862147	0.80241	0.914828	0.685386	0.692009	0.284769	0.674414	1.71196	0.66041	1.00056	0.761815	0.260428	0.213407	0.269192	0.342851	0.170908	0.181339	0.29494	0.285766	0.292754	0.284594	0.23579	0.712324	0.194277	0.230522
Konsul	NGB16852	0.326703	0.376009	0.432044	0.314581	0.301376	0.271506	0.376306	0.2269	0.26291	0.662894	0.168506	0.347356	0.494529	0.410331	0.363191	0.403012	0.538401	0.518933	0.519883	0.494044	0.469427	0.466078	0.351138	0.990283	0.986211	0.847086	0.545437	0.765005	0.361441	0.58199	0.66041	1.42778	0.751123	0.755778	0.391715	0.207632	0.274445	0.234674	0.366525	0.437872	0.179936	0.365589	0.343169	0.364942	0.534334	0.605985	0.450547	0.540095
Probat	NGB16909	0.154843	0.186295	0.116034	0.19366	0.24636	0.242222	0.324179	0.199192	0.360186	0.802706	0.328799	0.607425	0.196373	0.556182	0.651618	0.133213	0.196395	0.343923	0.505828	0.196676	0.15893	0.823299	0.221028	1.28974	1.19219	1.35292	0.780038	0.738085	0.202185	0.665087	1.00056	0.751123	1.8636	0.763254	0.184934	0.226136	0.38695	0.367134	0.16552	0.125012	0.349944	0.182439	0.205182	0.182842	0.182352	0.717702	0.119308	0.154765
Stakado	NGB16910	0.216738	0.325648	0.211275	0.244264	0.343965	0.248715	0.389224	0.279467	0.293158	0.681589	0.340805	0.399922	0.255904	0.478126	0.416808	0.227929	0.241486	0.355666	0.554594	0.255682	0.206121	0.525472	0.225157	0.811788	0.782771	0.884949	0.711435	0.722521	0.233622	0.605412	0.761815	0.755778	0.763254	1.52746	0.285689	0.32269	0.365872	0.455811	0.216649	0.199773	0.367989	0.277417	0.278367	0.276771	0.255537	0.656713	0.206934	0.262085
Ertus	NGB17	0.478644	0.562084	0.698467	0.54293	0.426798	0.581252	0.420856	0.553976	0.247331	0.276828	0.265307	0.325738	0.660912	0.361931	0.357327	0.685451	0.652269	0.630964	0.458091	0.660952	0.707229	0.305035	0.597605	0.247909	0.249613	0.206064	0.280417	0.288615	0.695344	0.257628	0.260428	0.391715	0.184934	0.285689	0.91835	0.343031	0.352079	0.26557	0.640299	0.710596	0.326101	0.46239	0.459926	0.461481	0.731963	0.307092	0.70988	0.68022
Sampo	NGB17135	0.343136	0.331264	0.231332	0.325238	0.286039	0.458348	0.25489	0.579425	0.619635	0.278382	1.01886	0.353549	0.283314	0.213032	0.457346	0.337523	0.212442	0.274371	0.221232	0.28493	0.237732	0.297137	0.294315	0.268893	0.259833	0.268797	0.357066	0.23713	0.301467	0.345306	0.213407	0.207632	0.226136	0.32269	0.343031	1.39351	0.77926	0.612668	0.318104	0.236372	0.63355	0.36548	0.38481	0.366409	0.260103	0.286328	0.223316	0.184728
Väinö	NGB17137	0.22615	0.31773	0.230402	0.271006	0.272242	0.484988	0.292558	0.734987	0.791477	0.274826	0.87956	0.381239	0.240897	0.298225	0.601092	0.333442	0.198383	0.387659	0.152821	0.2412	0.276712	0.624683	0.32358	0.282142	0.2505	0.258415	0.378717	0.203903	0.313928	0.489052	0.269192	0.274445	0.38695	0.365872	0.352079	0.77926	1.5313	0.811291	0.337917	0.239381	0.870246	0.258734	0.26441	0.259138	0.227139	0.264655	0.237877	0.223184
Pitkävihneinen maatiainen	NGB17141	0.253334	0.223869	0.153608	0.283749	0.250851	0.425786	0.243071	0.50065	0.942857	0.349011	0.825609	0.390569	0.23526	0.443041	0.563684	0.200721	0.216903	0.306139	0.193659	0.237139	0.202282	0.679175	0.252038	0.33112	0.323897	0.314482	0.562394	0.287803	0.236872	0.52779	0.342851	0.234674	0.367134	0.455811	0.26557	0.612668	0.811291	1.81374	0.339369	0.178604	1.04184	0.244695	0.274002	0.245624	0.200759	0.364571	0.156882	0.186826
Kökar	NGB17142	0.492839	0.527704	0.92692	0.58102	0.359596	0.500397	0.40223	0.520121	0.348175	0.253213	0.221475	0.308425	0.751515	0.339891	0.358657	0.754786	0.885974	0.671416	0.495918	0.751818	0.867676	0.342862	0.655125	0.229545	0.241228	0.128622	0.242885	0.227452	0.723456	0.201717	0.170908	0.366525	0.16552	0.216649	0.640299	0.318104	0.337917	0.339369	1.03786	0.933272	0.301961	0.463719	0.468608	0.463598	0.77793	0.244354	0.940434	0.81126
Starke	NGB18	0.52165	0.607454	1.12666	0.602478	0.382368	0.49061	0.415549	0.467798	0.237823	0.229772	0.121888	0.27133	0.830477	0.277065	0.286378	0.918821	0.918198	0.742501	0.548885	0.83078	1.02488	0.269533	0.732773	0.229473	0.263737	0.13564	0.227847	0.216877	0.834451	0.197969	0.181339	0.437872	0.125012	0.199773	0.710596	0.236372	0.239381	0.178604	0.933272	1.09135	0.197386	0.530078	0.507396	0.529956	0.900216	0.300998	1.14359	0.950088
Olympia	NGB18629	0.220127	0.234512	0.176592	0.246866	0.181935	0.508898	0.169954	0.517857	1.00654	0.385647	0.970951	0.436133	0.222271	0.361521	0.608986	0.176442	0.204964	0.34724	0.158351	0.222837	0.203734	0.659359	0.285787	0.262991	0.278349	0.288889	0.490064	0.29687	0.288738	0.589633	0.29494	0.179936	0.349944	0.367989	0.326101	0.63355	0.870246	1.04184	0.301961	0.197386	1.812	0.221466	0.250511	0.221869	0.172015	0.383353	0.183541	0.203245
Trond	NGB19	0.70511	0.506287	0.501407	0.622357	0.474716	0.461388	0.499758	0.483738	0.277132	0.263304	0.224214	0.351075	0.4137	0.211608	0.243502	0.551408	0.477528	0.445982	0.435378	0.412953	0.495202	0.278121	0.505573	0.253028	0.274163	0.227463	0.222782	0.292421	0.454435	0.23544	0.285766	0.365589	0.182439	0.277417	0.46239	0.36548	0.258734	0.244695	0.463719	0.530078	0.221466	1.14815	1.18528	1.29317	0.444579	0.320089	0.513083	0.509942
Standard	NGB2	0.73468	0.478354	0.481613	0.634335	0.489057	0.475991	0.486529	0.510682	0.266266	0.271344	0.238555	0.357276	0.398108	0.207569	0.234212	0.536866	0.449332	0.447982	0.446043	0.397361	0.464644	0.25859	0.481054	0.235335	0.249118	0.219223	0.241849	0.302561	0.434904	0.240854	0.292754	0.343169	0.205182	0.278367	0.459926	0.38481	0.26441	0.274002	0.468608	0.507396	0.250511	1.18528	1.13475	1.18437	0.446841	0.340731	0.493289	0.462317
Thor	NGB20	0.703939	0.505641	0.501285	0.622236	0.47512	0.460741	0.500424	0.483091	0.276748	0.263445	0.223568	0.350954	0.413054	0.211486	0.244431	0.551286	0.477144	0.44481	0.434732	0.412307	0.495081	0.278525	0.505714	0.252644	0.274041	0.227866	0.22266	0.29335	0.454839	0.236369	0.284594	0.364942	0.182842	0.276771	0.461481	0.366409	0.259138	0.245624	0.463598	0.529956	0.221869	1.29317	1.18437	1.14739	0.443932	0.319442	0.513224	0.509296
Norre	NGB21	0.456894	0.520379	0.870757	0.529058	0.383517	0.462614	0.382827	0.397002	0.242123	0.290787	0.184742	0.299524	0.889917	0.355935	0.230549	0.746936	0.944554	0.746276	0.526928	0.889432	0.92048	0.297464	0.569028	0.215919	0.226288	0.159107	0.1967	0.289971	0.695125	0.256359	0.23579	0.534334	0.182352	0.255537	0.731963	0.260103	0.227139	0.200759	0.77793	0.900216	0.172015	0.444579	0.446841	0.443932	1.14276	0.319739	0.886371	1.00559
Otso	NGB21864	0.31665	0.342062	0.275215	0.297701	0.244848	0.25909	0.398812	0.26411	0.303271	0.627372	0.22961	0.399007	0.282822	0.494278	0.431122	0.286355	0.31409	0.326919	0.687065	0.282337	0.296318	0.585473	0.278594	0.85656	0.817828	0.848849	0.602603	0.779897	0.271305	0.60686	0.712324	0.605985	0.717702	0.656713	0.307092	0.286328	0.264655	0.364571	0.244354	0.300998	0.383353	0.320089	0.340731	0.319442	0.319739	1.60115	0.273237	0.333114
Starke II	NGB22	0.49494	0.599911	1.20577	0.603863	0.387954	0.492257	0.417722	0.47811	0.211901	0.235095	0.113296	0.263	0.844728	0.281863	0.290651	0.941999	0.946102	0.743623	0.5676	0.844506	1.07432	0.262778	0.734421	0.232696	0.24254	0.142801	0.236321	0.215374	0.836361	0.179136	0.194277	0.450547	0.119308	0.206934	0.70988	0.223316	0.237877	0.156882	0.940434	1.14359	0.183541	0.513083	0.493289	0.513224	0.886371	0.273237	1.09769	0.951998
Holme	NGB23	0.447162	0.536642	0.940847	0.535343	0.377461	0.43634	0.406704	0.384645	0.247096	0.291821	0.127485	0.310798	0.888325	0.343315	0.229745	0.741143	0.945588	0.785382	0.534527	0.888103	0.941732	0.369129	0.635705	0.310953	0.312132	0.170907	0.226354	0.259759	0.745785	0.255817	0.230522	0.540095	0.154765	0.262085	0.68022	0.184728	0.223184	0.186826	0.81126	0.950088	0.203245	0.509942	0.462317	0.509296	1.00559	0.333114	0.951998	1.11116
Kuikka	NGB23170	0.321841	0.361432	0.283819	0.289502	0.279972	0.430226	0.307377	0.566532	0.607005	0.310389	0.898318	0.392908	0.255979	0.301491	0.493553	0.314128	0.24051	0.320032	0.201249	0.256283	0.280504	0.340697	0.328685	0.289872	0.267945	0.335463	0.334983	0.239729	0.329535	0.383877	0.31657	0.251454	0.313545	0.330803	0.36296	0.939019	0.723831	0.560389	0.345909	0.267329	0.58311	0.309263	0.339358	0.30993	0.26874	0.279737	0.28263	0.233802
Istäsuomalainen	NGB23171	0.207892	0.252472	0.177222	0.245658	0.145017	0.557841	0.103366	0.590957	1.08988	0.27626	1.53191	0.421009	0.217388	0.225352	0.574694	0.23405	0.165946	0.291418	0.114082	0.218741	0.213817	0.516625	0.27854	0.242878	0.186029	0.198145	0.334727	0.174354	0.266262	0.460554	0.278241	0.170588	0.312501	0.319256	0.282882	0.900427	0.864575	0.873379	0.303116	0.179373	1.03185	0.206342	0.213593	0.205957	0.229886	0.278693	0.178658	0.182082
Alrö	NGB23345	0.262688	0.215368	0.222828	0.234024	0.26178	0.227446	0.344587	0.182053	0.246946	0.829679	0.220285	0.674309	0.32181	0.645646	0.41392	0.186443	0.332598	0.368007	0.616824	0.321063	0.212423	0.452739	0.241961	0.860888	0.878347	0.915145	0.715111	1.99048	0.224169	0.739323	0.701424	0.771794	0.744612	0.730886	0.285164	0.23893	0.212531	0.284877	0.223214	0.212376	0.294994	0.289758	0.299898	0.290687	0.28547	0.779597	0.211135	0.254995
Dirigent	NGB23346	0.242093	0.197137	0.153395	0.244675	0.33151	0.166678	0.376507	0.159358	0.287005	0.855559	0.196014	0.53687	0.225857	0.491141	0.499929	0.16191	0.212751	0.325619	0.632464	0.226686	0.17161	0.628023	0.231082	1.31345	1.36819	1.60979	0.976517	0.876011	0.189921	0.70875	0.926071	0.870932	1.35681	0.879912	0.186586	0.208096	0.201914	0.267959	0.152993	0.158435	0.226612	0.243432	0.249895	0.24331	0.1693	0.768455	0.155619	0.182149
Frimegu	NGB23348	0.229545	0.253645	0.186535	0.255759	0.308984	0.189052	0.373149	0.224794	0.363206	0.656323	0.328931	0.441612	0.249282	0.5978	0.550923	0.149625	0.287114	0.312284	0.570028	0.248534	0.186895	0.512022	0.205143	0.893389	0.833652	0.890404	0.589018	0.88867	0.188401	0.748192	0.870461	0.705568	0.838028	0.874454	0.238105	0.327096	0.201182	0.370154	0.234183	0.178971	0.359791	0.226157	0.251526	0.227874	0.261255	0.793717	0.169591	0.24706
Hybris	NGB23349	0.173814	0.196864	0.115312	0.209743	0.143761	0.582843	0.0863558	0.606768	1.00066	0.237982	1.99986	0.439446	0.174908	0.227247	0.599433	0.22938	0.112964	0.258391	0.0844683	0.176787	0.150069	0.396687	0.225557	0.205125	0.185824	0.241001	0.338985	0.218786	0.218531	0.470588	0.309544	0.167232	0.327787	0.340319	0.264559	1.01864	0.879336	0.825123	0.220989	0.121402	0.969939	0.223728	0.238069	0.223082	0.184518	0.230174	0.112809	0.127524
Junker	NGB23350	0.491342	0.470017	0.56465	0.456376	0.3644	0.329016	0.410185	0.304103	0.183621	0.561024	0.0314515	0.372045	0.535497	0.346533	0.288103	0.489142	0.592235	0.601913	0.791388	0.535275	0.526412	0.303817	0.445146	0.648949	0.644352	0.687451	0.51735	0.630051	0.444684	0.38717	0.469529	0.826627	0.542125	0.649707	0.448438	0.215779	0.168111	0.140681	0.491779	0.576254	0.153686	0.434915	0.432976	0.434268	0.520688	0.587087	0.577114	0.546666
Miller	NGB23351	0.275746	0.327415	0.21383	0.288043	0.325777	0.252583	0.34688	0.224782	0.255802	0.789172	0.275879	0.437925	0.298108	0.418715	0.452184	0.23101	0.268197	0.256082	0.542183	0.297886	0.229157	0.46501	0.290204	0.853991	0.882478	0.838929	1.04194	0.677026	0.272937	0.678073	0.607878	0.66512	0.744541	0.766525	0.267501	0.395615	0.290969	0.413466	0.222881	0.195239	0.409667	0.281285	0.275146	0.281689	0.271483	0.649554	0.205026	0.228142
Pentium	NGB23352	0.212919	0.229142	0.192752	0.257513	0.23223	0.436835	0.291668	0.435816	0.736497	0.429903	0.675177	0.515048	0.256287	0.513956	0.688163	0.188664	0.214561	0.291982	0.303697	0.256328	0.208604	0.814682	0.283042	0.388381	0.425533	0.460492	0.534319	0.448517	0.297022	0.587152	0.587588	0.300337	0.611608	0.435876	0.28791	0.508448	0.710485	0.900726	0.304993	0.195429	0.90953	0.153341	0.202079	0.154533	0.208394	0.494302	0.185261	0.181595
Revelj	NGB23353	0.300144	0.332646	0.293105	0.28067	0.271666	0.271467	0.383881	0.244453	0.390218	0.655503	0.3373	0.537943	0.433573	0.471208	0.428007	0.259346	0.374255	0.426994	0.561067	0.433351	0.30108	0.50595	0.295697	0.798305	0.795283	0.740181	0.569555	0.722167	0.274754	0.649695	0.73888	0.677965	0.783906	0.531503	0.299251	0.205755	0.368931	0.293451	0.264871	0.301559	0.425401	0.317499	0.292979	0.318428	0.319513	0.683404	0.295854	0.349954
Skjaldar	NGB23356	0.369862	0.280005	0.275912	0.282645	0.264188	0.444637	0.31575	0.618491	0.526628	0.365498	0.585566	0.714527	0.352313	0.404914	0.65868	0.261058	0.311374	0.461265	0.317801	0.352091	0.325111	0.517114	0.299509	0.310848	0.312027	0.411316	0.418976	0.371247	0.302198	0.548741	0.351462	0.31024	0.387823	0.397204	0.391813	0.500496	0.570197	0.569812	0.340103	0.307734	0.651611	0.321574	0.331189	0.321453	0.330152	0.375283	0.286538	0.330923
Solist	NGB23357	0.191536	0.338781	0.193162	0.243219	0.299857	0.224825	0.38319	0.222231	0.286861	0.737783	0.249172	0.398876	0.244881	0.498874	0.483505	0.209554	0.233876	0.381928	0.585057	0.244659	0.181181	0.608448	0.256145	0.901591	0.976816	1.06035	0.746361	0.820202	0.247018	0.721735	0.868686	0.795693	0.940756	1.45532	0.249459	0.24051	0.314413	0.352362	0.189084	0.194001	0.363793	0.274271	0.270757	0.273624	0.226659	0.819249	0.200112	0.257363
Terra	NGB23358	0.211054	0.219137	0.15439	0.192106	0.29627	0.210472	0.326563	0.136721	0.392503	0.872045	0.21749	0.800173	0.216087	0.605566	0.704678	0.155553	0.262322	0.257558	0.626107	0.21534	0.14346	0.612738	0.266211	1.02141	0.964301	1.03576	0.773232	1.05398	0.212972	0.809522	0.823612	0.855122	0.936119	0.787957	0.208586	0.224319	0.230479	0.346149	0.134558	0.148402	0.302965	0.25808	0.256142	0.257959	0.191563	0.777852	0.152938	0.201261
Ure	NGB23359	0.353132	0.332857	0.334278	0.330508	0.315465	0.256974	0.453149	0.328688	0.342116	0.532831	0.232483	0.580954	0.374969	0.733465	0.516442	0.281876	0.394422	0.317976	0.47358	0.373697	0.292889	0.526379	0.34816	0.520717	0.511393	0.483073	0.373364	0.667764	0.349011	0.569297	0.460504	0.45683	0.49844	0.50572	0.378234	0.24509	0.296936	0.349065	0.362759	0.331441	0.410383	0.328213	0.322074	0.328092	0.419238	0.84956	0.321273	0.354367
Wasmo	NGB23360	0.272847	0.340796	0.185725	0.215301	0.266163	0.284081	0.310897	0.195626	0.461122	0.668379	0.396126	0.50487	0.259237	0.592526	0.540923	0.184262	0.289718	0.438295	0.437144	0.259015	0.172956	0.564776	0.212997	0.761031	0.822601	0.805834	0.628381	0.78782	0.210435	1.22342	0.655393	0.696618	0.688866	0.645995	0.270641	0.318408	0.404126	0.413193	0.211842	0.201005	0.446417	0.246615	0.227347	0.247807	0.234713	0.658208	0.182959	0.277495
Agrestis	NGB23780	0.19283	0.234522	0.144568	0.229809	0.247063	0.228483	0.374244	0.215123	0.335156	0.786866	0.312696	0.477105	0.229634	0.588393	0.627113	0.161223	0.149835	0.355128	0.44824	0.228887	0.152281	0.595827	0.251138	0.848009	0.863367	1.06033	0.659432	0.764256	0.22048	0.785784	0.97816	0.63997	1.0652	0.70304	0.229748	0.281716	0.371635	0.428227	0.162809	0.134904	0.359573	0.250359	0.256823	0.250763	0.174652	0.691884	0.132088	0.150741
Walde	NGB24	0.512643	0.590307	0.959852	0.566952	0.371523	0.510486	0.410743	0.463254	0.26085	0.28562	0.20872	0.331117	0.760553	0.398293	0.334349	0.789031	0.77738	0.678354	0.503381	0.760331	0.972553	0.274705	0.709588	0.276131	0.279936	0.185448	0.297611	0.22625	0.788422	0.211806	0.290489	0.405759	0.206067	0.236716	0.670606	0.270689	0.248228	0.20163	0.794293	0.970143	0.22015	0.52816	0.516507	0.527514	0.788806	0.28884	0.972316	0.80113
Folke	NGB2434	0.434529	0.552891	0.987029	0.554743	0.366928	0.480685	0.409037	0.429777	0.273848	0.304657	0.225131	0.291338	0.813462	0.355888	0.328704	0.804655	0.827664	0.649078	0.496949	0.813765	1.08585	0.276149	0.67296	0.259459	0.280594	0.164312	0.314023	0.219818	0.777526	0.213514	0.249135	0.510657	0.158149	0.227395	0.694632	0.286576	0.281182	0.225131	0.838537	0.984979	0.215818	0.427203	0.408197	0.426819	0.956983	0.292123	1.00343	0.947252
Holger	NGB2435	0.375809	0.467915	0.821705	0.450598	0.345231	0.414088	0.362396	0.393376	0.277357	0.363832	0.241507	0.314803	0.925676	0.345482	0.281012	0.744885	0.982939	0.74475	0.527241	0.924929	0.857775	0.348715	0.508687	0.310231	0.299332	0.214297	0.219331	0.334133	0.62008	0.231202	0.257633	0.641775	0.205245	0.270815	0.65718	0.313191	0.306747	0.267501	0.746208	0.826483	0.219328	0.439902	0.421684	0.439255	1.0474	0.325303	0.835745	0.941571
Sture	NGB25	0.483123	0.587044	1.11466	0.591783	0.364583	0.473613	0.422971	0.455265	0.261	0.250586	0.108305	0.258272	0.872296	0.328336	0.315594	0.906813	0.954241	0.76699	0.608822	0.872074	1.02784	0.287195	0.720766	0.270505	0.285863	0.130984	0.248661	0.20697	0.831371	0.187274	0.208192	0.447658	0.154753	0.227151	0.705415	0.234342	0.213719	0.211758	0.947522	1.09449	0.219512	0.497064	0.477271	0.496943	0.875867	0.267722	1.13473	0.967488
Helge	NGB26	0.447238	0.545119	0.856636	0.554323	0.333949	0.516499	0.397589	0.474257	0.308875	0.302136	0.261734	0.330041	0.936188	0.383038	0.287585	0.71286	0.863478	0.801737	0.456618	0.936753	0.900583	0.362115	0.688031	0.312866	0.306168	0.185948	0.272904	0.219661	0.753212	0.212831	0.294139	0.493957	0.216807	0.230389	0.655876	0.280379	0.303605	0.236264	0.739915	0.854324	0.276052	0.447526	0.427995	0.446879	0.87044	0.27096	0.873826	0.908234
Jarl	NGB3	1.11756	0.646979	0.536545	0.735741	0.660307	0.608118	0.518091	0.449557	0.281549	0.234375	0.162464	0.328185	0.381883	0.310026	0.217461	0.602037	0.43442	0.343795	0.439533	0.382711	0.528502	0.109241	0.601365	0.192328	0.201384	0.194595	0.30597	0.2459	0.550227	0.168438	0.253948	0.316966	0.167951	0.221706	0.494902	0.342065	0.227967	0.24176	0.500958	0.538434	0.204877	0.683559	0.714179	0.682912	0.475778	0.298249	0.542182	0.469197
Cymbal	NGB31181	0.205966	0.310413	0.189738	0.219577	0.243919	0.263412	0.345894	0.200952	0.311269	0.812343	0.255988	0.507833	0.321804	0.606255	0.56778	0.171733	0.287167	0.366426	0.43932	0.321582	0.216093	0.562225	0.306548	1.04153	1.1887	0.969753	0.803328	0.892398	0.292169	0.754021	0.872352	1.0341	0.868014	0.842998	0.266778	0.234198	0.300749	0.422196	0.208241	0.190314	0.400279	0.244065	0.218757	0.243418	0.273911	0.773289	0.190386	0.279933
Penta Sejet	NGB31730	0.292229	0.297424	0.1799	0.31608	0.405277	0.299524	0.397498	0.362048	0.395169	0.722421	0.449905	0.478564	0.228993	0.469332	0.554266	0.239091	0.192518	0.196682	0.373817	0.230347	0.233037	0.594924	0.298547	0.58611	0.696782	0.668987	1.28712	0.594783	0.283907	0.619987	0.5792	0.445815	0.646544	0.632293	0.252213	0.454372	0.497291	0.568587	0.245666	0.188616	0.557961	0.253132	0.262221	0.253798	0.209195	0.485388	0.176872	0.149575
Linna	NGB334	0.321495	0.337717	0.354104	0.326965	0.254944	0.624444	0.265282	0.885996	0.683592	0.310305	0.924228	0.441399	0.364337	0.332653	0.594034	0.452156	0.307119	0.486155	0.304356	0.36464	0.401727	0.386038	0.343567	0.197626	0.173598	0.192541	0.276083	0.201834	0.347831	0.244105	0.215134	0.173124	0.214997	0.302887	0.440334	0.672426	0.796742	0.655618	0.425384	0.340764	0.830892	0.281872	0.294112	0.2807	0.325634	0.300396	0.355803	0.350037
Nisu	NGB343	0.21467	0.185731	0.143827	0.220666	0.183567	0.404189	0.224888	0.629507	0.763718	0.323475	0.96917	0.460609	0.214189	0.374969	0.557579	0.252382	0.202396	0.285856	0.216174	0.214754	0.175958	0.535482	0.196569	0.266199	0.222741	0.22908	0.387455	0.318195	0.181141	0.316879	0.257187	0.222004	0.351314	0.392203	0.241348	0.927161	0.947499	0.920331	0.445907	0.15018	0.881085	0.255132	0.293892	0.257636	0.181	0.263678	0.147101	0.125581
Vakka	NGB344	0.180892	0.121756	0.149172	0.246491	0.194163	0.478065	0.155137	0.627237	0.894308	0.27578	1.10291	0.439696	0.235813	0.338302	0.531152	0.225692	0.198287	0.321658	0.200775	0.236378	0.183403	0.704671	0.246288	0.240035	0.157716	0.240201	0.421683	0.25816	0.241363	0.418587	0.232074	0.127047	0.388954	0.362625	0.2761	0.857673	0.946279	0.980553	0.4011	0.139245	1.01824	0.204811	0.271666	0.207315	0.172953	0.210994	0.145881	0.157182
Aura	NGB347	0.31928	0.370687	0.297275	0.371226	0.192076	0.561313	0.201363	0.82234	0.618098	0.304677	0.82565	0.433671	0.306458	0.394768	0.515411	0.378259	0.25948	0.484728	0.333124	0.306498	0.299998	0.466008	0.369185	0.231908	0.182674	0.265684	0.288048	0.318039	0.350605	0.301232	0.308758	0.242066	0.305733	0.294108	0.438382	0.730077	0.705778	0.640275	0.455991	0.289974	0.675074	0.342937	0.400865	0.342815	0.285347	0.224399	0.292409	0.232029
Jyvä	NGB348	0.216076	0.165343	0.138406	0.216558	0.188649	0.416623	0.226294	0.627762	0.724425	0.339585	0.973464	0.473831	0.228723	0.359833	0.555309	0.232782	0.196449	0.321921	0.22782	0.229289	0.165023	0.517195	0.182221	0.232683	0.207342	0.257531	0.388074	0.313037	0.177558	0.327213	0.276185	0.213958	0.347206	0.39886	0.261921	0.937757	0.905318	0.913073	0.42053	0.139508	0.904022	0.251286	0.306588	0.253265	0.192646	0.292391	0.140367	0.123311
Ankar	NGB4	0.635618	0.51084	0.476813	0.584636	0.458788	0.511627	0.489868	0.534503	0.376472	0.280723	0.329069	0.377946	0.395934	0.260797	0.353608	0.513686	0.441119	0.471802	0.399757	0.395975	0.486889	0.28845	0.500935	0.247603	0.258235	0.23254	0.253853	0.264152	0.461088	0.315088	0.298457	0.320252	0.226376	0.279606	0.467467	0.380273	0.362538	0.329856	0.481138	0.492094	0.321594	0.91108	0.871594	0.909908	0.411846	0.29497	0.482451	0.456466
Borstvete från Gotland	NGB4494	0.328469	0.249378	0.173603	0.321861	0.255091	0.504334	0.234183	0.540075	1.21466	0.288921	0.984766	0.383781	0.216919	0.329912	0.528276	0.243822	0.167054	0.295676	0.191072	0.217748	0.184203	0.478872	0.316407	0.238209	0.204729	0.250453	0.428784	0.297557	0.284961	0.522315	0.357857	0.170645	0.363497	0.282028	0.280838	0.651042	0.778771	0.901269	0.27114	0.207525	0.965738	0.314578	0.331544	0.315244	0.229155	0.301331	0.179502	0.165859
Storvik Sjundeå	NGB4783	0.191252	0.212726	0.144565	0.224292	0.132841	0.504179	0.148956	0.556462	1.04252	0.346269	1.05393	0.439817	0.166614	0.382272	0.64444	0.157281	0.157709	0.355125	0.164398	0.167705	0.165669	0.679059	0.259537	0.311574	0.260764	0.255813	0.474842	0.323135	0.248047	0.573624	0.326456	0.13163	0.396689	0.382701	0.286723	0.721519	0.889947	1.01612	0.296717	0.143304	1.70157	0.142965	0.181199	0.143106	0.13185	0.318243	0.141275	0.142598
Saxo	NGB5	0.674471	0.500592	0.450286	0.597494	0.524685	0.524748	0.500889	0.490121	0.360186	0.305134	0.322497	0.397894	0.411944	0.347701	0.348086	0.493986	0.430083	0.466543	0.419443	0.411721	0.473753	0.269012	0.532962	0.25626	0.265054	0.26798	0.292706	0.242614	0.484186	0.292499	0.343612	0.286373	0.27757	0.283012	0.461421	0.333003	0.325508	0.319083	0.469577	0.450337	0.289553	0.605965	0.631859	0.605319	0.424704	0.257941	0.455398	0.434666
Squarehead II	NGB5147	0.518037	0.470455	0.484479	0.533223	0.691476	0.376717	0.654551	0.248877	0.112377	0.336176	0.00773308	0.282159	0.411739	0.372703	0.167234	0.490893	0.426991	0.346082	0.430004	0.410992	0.447292	0.187148	0.508601	0.298067	0.34756	0.332368	0.281999	0.256589	0.469541	0.22534	0.381743	0.354963	0.287869	0.350289	0.417893	0.234597	0.186142	0.169477	0.394278	0.480066	0.0979344	0.628605	0.58308	0.628483	0.426601	0.314452	0.47725	0.460456
Hunsballe R	NGB5153	0.559984	0.452535	0.399867	0.509789	0.788563	0.349345	0.655537	0.305265	0.193972	0.333486	0.0289368	0.356139	0.390669	0.385242	0.16927	0.452756	0.419575	0.316084	0.457772	0.389922	0.393925	0.226207	0.40167	0.276997	0.265573	0.330203	0.299002	0.320591	0.38099	0.235253	0.375115	0.374066	0.282028	0.33447	0.390258	0.203549	0.183977	0.164686	0.378722	0.417773	0.0826408	0.537691	0.53444	0.537569	0.441503	0.385544	0.401565	0.460392
Ankar II	NGB6	0.469068	0.600559	0.675237	0.549109	0.380462	0.620252	0.387649	0.716122	0.295259	0.291146	0.2749	0.354498	0.549984	0.352355	0.415758	0.61811	0.574688	0.628477	0.423834	0.549762	0.634637	0.30675	0.590918	0.249886	0.2852	0.211718	0.273467	0.239654	0.653735	0.232036	0.236149	0.354832	0.214481	0.347008	0.698713	0.379406	0.431777	0.282777	0.633612	0.663735	0.352497	0.437585	0.456127	0.437989	0.606594	0.325612	0.682712	0.602376
Skandia	NGB6383	0.582632	0.46153	0.40151	0.519572	0.805435	0.349413	0.676873	0.30507	0.185638	0.312023	0.0203395	0.348855	0.378659	0.371656	0.169337	0.457812	0.41229	0.306699	0.449962	0.377911	0.393205	0.201855	0.409352	0.270763	0.249361	0.325019	0.277801	0.292826	0.380795	0.224292	0.355489	0.373346	0.274218	0.330862	0.389538	0.216745	0.181944	0.1511	0.378264	0.419153	0.0774569	0.549312	0.545272	0.54919	0.438157	0.385874	0.402683	0.459409
Lading Skæghvede	NGB6388	0.324224	0.367754	0.291716	0.298711	0.292333	0.426569	0.319475	0.568914	0.584443	0.302531	0.859214	0.386363	0.260463	0.3065	0.499087	0.323075	0.248932	0.321102	0.211509	0.260766	0.286562	0.338878	0.334481	0.288579	0.26035	0.336796	0.340779	0.233184	0.336119	0.376282	0.306875	0.248323	0.31304	0.331085	0.364817	0.904904	0.706783	0.558045	0.349342	0.273125	0.568425	0.320573	0.343842	0.32124	0.271386	0.28317	0.290264	0.243011
Lantvete från Halland	NGB6691	0.396695	0.392699	0.385981	0.369081	0.545715	0.364342	0.49146	0.275887	0.361785	0.380779	0.285236	0.303917	0.404353	0.363216	0.239143	0.410775	0.353174	0.305086	0.320477	0.404131	0.360084	0.387718	0.376231	0.400698	0.307877	0.360429	0.383055	0.355018	0.377344	0.374971	0.377508	0.385386	0.393913	0.429026	0.372696	0.288127	0.318443	0.320945	0.35407	0.375266	0.22761	0.46814	0.450972	0.468018	0.400835	0.306278	0.378226	0.382963
Lantvete från Uppsala	NGB6692	0.305518	0.305461	0.278262	0.306788	0.34741	0.470356	0.354597	0.470912	0.637682	0.322949	0.848648	0.35663	0.294271	0.341096	0.420515	0.334827	0.258059	0.308173	0.231926	0.295362	0.268119	0.440693	0.327066	0.309784	0.26974	0.282906	0.378526	0.31268	0.322928	0.409828	0.364315	0.28397	0.374944	0.390888	0.355302	0.600522	0.565983	0.558245	0.342715	0.270961	0.582804	0.354382	0.363734	0.354523	0.305194	0.295448	0.269195	0.277083
Kotte	NGB6693	0.519035	0.407648	0.37756	0.434706	0.676457	0.380078	0.536867	0.322869	0.38146	0.381548	0.266313	0.348799	0.337117	0.431204	0.272472	0.360343	0.35972	0.318984	0.394504	0.33742	0.388686	0.37851	0.380151	0.259679	0.304183	0.362774	0.447892	0.325592	0.375751	0.444271	0.391143	0.284804	0.368163	0.375706	0.375041	0.317254	0.359911	0.410464	0.36718	0.360544	0.369643	0.414032	0.424172	0.414698	0.365369	0.364025	0.380046	0.36194
Extra squarehead	NGB6694	0.900273	0.579092	0.493864	0.645273	0.680118	0.594321	0.531338	0.449938	0.32578	0.252348	0.202493	0.300471	0.390666	0.337977	0.256178	0.541764	0.404868	0.368858	0.401579	0.391494	0.483984	0.147433	0.528489	0.183519	0.197039	0.216244	0.308189	0.246018	0.495731	0.220021	0.275072	0.30842	0.186974	0.243618	0.478742	0.355312	0.272985	0.262884	0.465629	0.491027	0.227052	0.557118	0.593252	0.556734	0.446226	0.289965	0.491099	0.428355
Bore	NGB6695	0.370669	0.429165	0.340787	0.408436	0.466912	0.486406	0.38535	0.439699	0.586777	0.342674	0.671446	0.32988	0.36126	0.345067	0.369872	0.373458	0.316908	0.328161	0.286312	0.361825	0.343247	0.329133	0.388803	0.249426	0.252706	0.276112	0.370157	0.288556	0.389916	0.348157	0.279012	0.269036	0.330865	0.342346	0.388681	0.531236	0.484093	0.549088	0.37977	0.352391	0.536362	0.333934	0.352476	0.334338	0.333585	0.300469	0.337234	0.306524
Grenadier II	NGB6696	0.537466	0.476492	0.383125	0.470992	0.694626	0.389581	0.558974	0.292462	0.223443	0.333549	0.18628	0.276906	0.350296	0.382417	0.214757	0.410283	0.326688	0.296454	0.362522	0.349549	0.36353	0.253577	0.406985	0.280999	0.25986	0.314249	0.343702	0.308576	0.39602	0.299646	0.391982	0.33238	0.290493	0.33112	0.418416	0.32387	0.269638	0.231442	0.337824	0.376875	0.190095	0.497318	0.493541	0.497459	0.382488	0.32154	0.373271	0.352275
Extra squarehead II	NGB6697	0.559376	0.47976	0.481444	0.542791	0.690016	0.395738	0.645477	0.267109	0.121683	0.327102	0.0215023	0.278598	0.412905	0.37597	0.171025	0.492847	0.421855	0.358013	0.431695	0.412158	0.450295	0.183588	0.502415	0.283741	0.331396	0.327757	0.286841	0.253816	0.472282	0.222042	0.382647	0.345363	0.277482	0.339376	0.429036	0.253093	0.183369	0.175369	0.398594	0.475981	0.0991002	0.622419	0.582145	0.62256	0.434856	0.311154	0.47369	0.460572
Pudel	NGB6698	0.45964	0.513147	0.445512	0.471675	0.527263	0.434113	0.512657	0.410251	0.180277	0.305349	0.239739	0.264722	0.391678	0.342139	0.310753	0.454552	0.41113	0.364618	0.363992	0.391455	0.424341	0.253997	0.470947	0.273804	0.262118	0.297865	0.345173	0.276963	0.474686	0.254116	0.279759	0.29604	0.294327	0.311059	0.45901	0.611805	0.415522	0.29908	0.411501	0.427971	0.250907	0.446274	0.477682	0.446415	0.428595	0.325373	0.439859	0.39602
Renodlat sammetsvete	NGB6699	0.212051	0.216195	0.12414	0.221197	0.17307	0.547296	0.130894	0.576998	1.04625	0.284096	1.72197	0.471118	0.16877	0.288064	0.5694	0.206963	0.136759	0.267744	0.150274	0.170123	0.151283	0.408667	0.210754	0.223143	0.182574	0.225935	0.343612	0.255447	0.201102	0.481517	0.270584	0.163457	0.335303	0.364376	0.252119	0.910888	0.829348	0.845242	0.230867	0.126029	0.975617	0.230456	0.253462	0.23086	0.171816	0.25607	0.117437	0.13609
Sol	NGB6700	0.393777	0.410787	0.32871	0.36485	0.410199	0.317574	0.431827	0.312092	0.416632	0.368408	0.334569	0.311239	0.345245	0.357672	0.342566	0.313068	0.330563	0.316609	0.296553	0.344235	0.301238	0.395565	0.35362	0.338701	0.247718	0.321276	0.32946	0.35315	0.354471	0.380717	0.351483	0.289518	0.289117	0.369129	0.387107	0.40074	0.363575	0.448262	0.331459	0.33375	0.578112	0.410607	0.401054	0.410748	0.353804	0.338281	0.317017	0.365866
Sol II	NGB6701	0.673649	0.493993	0.406928	0.554135	0.71659	0.388965	0.597743	0.29132	0.211273	0.29801	0.0932381	0.312524	0.365697	0.360532	0.158738	0.420169	0.353903	0.284285	0.396039	0.365212	0.370003	0.225916	0.45862	0.255438	0.243751	0.277398	0.316041	0.289054	0.416934	0.267521	0.34279	0.326775	0.282787	0.302671	0.397319	0.299359	0.188412	0.199842	0.349285	0.390174	0.136439	0.533199	0.533098	0.53334	0.385547	0.307007	0.392872	0.381067
Thule II	NGB6702	0.393793	0.386122	0.306145	0.371956	0.368204	0.481697	0.350446	0.522427	0.558174	0.303307	0.819554	0.374273	0.311127	0.318828	0.395622	0.354834	0.282529	0.331067	0.228564	0.311692	0.307556	0.299481	0.335256	0.232114	0.237757	0.256962	0.291404	0.228708	0.33637	0.370231	0.282706	0.263803	0.248435	0.323196	0.370057	0.864982	0.658721	0.507882	0.349855	0.297007	0.52719	0.373601	0.360634	0.372954	0.323888	0.297862	0.295766	0.304966
Pansar II	NGB6703	0.550143	0.489432	0.414707	0.463713	0.737498	0.366286	0.554321	0.273105	0.213802	0.336773	0.124124	0.296409	0.42599	0.431591	0.241351	0.401691	0.437566	0.37845	0.373361	0.425243	0.416905	0.27807	0.387628	0.256391	0.256257	0.327714	0.270256	0.309963	0.381914	0.378228	0.421201	0.330353	0.246455	0.322003	0.433981	0.265915	0.227962	0.193968	0.34945	0.396903	0.137392	0.456956	0.433749	0.457097	0.465533	0.341569	0.409579	0.441623
Svea I	NGB6704	0.247154	0.283332	0.2753	0.249211	0.220777	0.401489	0.266824	0.847628	0.698788	0.249355	0.908441	0.411696	0.329907	0.287458	0.585074	0.352346	0.262449	0.388183	0.148355	0.33021	0.309794	0.490245	0.260299	0.212559	0.188007	0.185944	0.326989	0.216505	0.294234	0.30919	0.206174	0.246348	0.21759	0.329898	0.37177	0.970673	1.20894	0.788446	0.403033	0.282441	0.733708	0.343806	0.357621	0.344209	0.2744	0.266491	0.276473	0.25259
Riddar	NGB6705	0.645789	0.469547	0.388258	0.563561	1.25903	0.400228	0.664934	0.331204	0.254045	0.304022	0.142312	0.281776	0.347027	0.333198	0.224617	0.455064	0.370943	0.266403	0.3498	0.347068	0.379166	0.174162	0.437849	0.228366	0.243199	0.284723	0.390846	0.259882	0.430823	0.302941	0.302064	0.298915	0.245475	0.339403	0.426963	0.284366	0.269519	0.247865	0.362387	0.385683	0.1821	0.475931	0.491848	0.476335	0.382632	0.249214	0.390219	0.377101
Birgitta	NGB6706	0.559595	0.496521	0.458557	0.518066	0.614353	0.383091	0.574014	0.365267	0.203824	0.308678	0.130688	0.315052	0.419163	0.355708	0.269971	0.47915	0.39608	0.341428	0.347891	0.418941	0.430559	0.273081	0.476377	0.244837	0.259408	0.290954	0.289686	0.275041	0.45911	0.215697	0.289653	0.333504	0.237002	0.326992	0.443697	0.297949	0.239253	0.24832	0.423233	0.45992	0.182292	0.548593	0.527224	0.548734	0.411444	0.315049	0.448702	0.439785
Pansar III	NGB6707	0.582398	0.456045	0.396287	0.480215	0.835922	0.344452	0.598655	0.284093	0.233979	0.349074	0.150603	0.321838	0.397592	0.452031	0.201399	0.389572	0.430699	0.313292	0.375158	0.396845	0.390608	0.254135	0.371308	0.240333	0.249127	0.305617	0.317741	0.319375	0.361656	0.396305	0.371009	0.342391	0.290264	0.354784	0.401907	0.300271	0.250766	0.20233	0.374616	0.379533	0.156782	0.473195	0.47782	0.473598	0.43766	0.329975	0.398248	0.405348
Kron	NGB6708	0.575404	0.465067	0.425789	0.48346	0.78429	0.356888	0.594286	0.274735	0.173157	0.339978	0.0766527	0.280709	0.414491	0.455539	0.161583	0.409885	0.422653	0.311548	0.357135	0.413744	0.420635	0.192001	0.397397	0.208394	0.206423	0.271053	0.268472	0.330234	0.394047	0.286907	0.390797	0.32358	0.208174	0.2937	0.421695	0.244176	0.213575	0.156474	0.34189	0.39827	0.0865073	0.482742	0.441417	0.482095	0.43828	0.316416	0.413571	0.441677
Stål	NGB6709	0.557396	0.447584	0.383887	0.452061	0.748952	0.350958	0.584943	0.248062	0.214753	0.352428	0.092779	0.299986	0.39412	0.437794	0.189788	0.397391	0.391254	0.270697	0.328887	0.39311	0.370069	0.238585	0.393831	0.265482	0.210996	0.264598	0.320833	0.353975	0.382866	0.348196	0.396683	0.339181	0.24373	0.275429	0.406838	0.254788	0.212897	0.219863	0.305239	0.368184	0.114187	0.484952	0.440477	0.484305	0.396903	0.301034	0.376396	0.384284
Sol III	NGB6710	0.628563	0.482254	0.358429	0.488044	0.729007	0.345455	0.604646	0.245447	0.186668	0.311741	0.050253	0.261136	0.367611	0.388179	0.143061	0.392413	0.3356	0.226858	0.362769	0.366864	0.334895	0.192383	0.410121	0.27547	0.279275	0.293491	0.311653	0.316438	0.390491	0.267597	0.353632	0.351795	0.268947	0.276227	0.392932	0.273179	0.148578	0.15108	0.286607	0.354804	0.0858396	0.554543	0.52451	0.554159	0.376696	0.308921	0.344373	0.355411
Bore II	NGB6712	0.4409	0.715754	0.435437	0.453197	0.418986	0.418262	0.485777	0.355014	0.2579	0.300788	0.161133	0.277228	0.457748	0.386941	0.301203	0.468371	0.412346	0.434889	0.403018	0.456738	0.428445	0.312191	0.480827	0.341713	0.286702	0.305119	0.246348	0.29577	0.485879	0.312309	0.341891	0.367625	0.249592	0.346671	0.520354	0.287695	0.284664	0.317625	0.394074	0.470935	0.241094	0.438562	0.421395	0.438441	0.463157	0.368862	0.42742	0.470492
Gyllen I	NGB6713	0.56876	0.59391	0.399453	0.480755	0.58807	0.377551	0.553771	0.282007	0.201173	0.323357	0.107819	0.279842	0.393669	0.393493	0.201414	0.427135	0.356406	0.370022	0.416659	0.392921	0.401651	0.143346	0.423575	0.316756	0.283539	0.320074	0.255001	0.313613	0.412085	0.26556	0.37155	0.374702	0.283977	0.323291	0.447084	0.243309	0.196954	0.190266	0.336559	0.409481	0.117149	0.448265	0.425321	0.448144	0.404329	0.35756	0.387235	0.404575
Thule III	NGB6714	0.31129	0.321211	0.261716	0.294442	0.2815	0.512625	0.238011	0.651819	0.587527	0.245223	1.25327	0.416229	0.302406	0.268622	0.556522	0.308828	0.226283	0.311056	0.173106	0.304022	0.28597	0.273431	0.272709	0.167991	0.172321	0.230125	0.318918	0.206859	0.301392	0.318711	0.210181	0.226199	0.191927	0.288481	0.384968	1.09993	0.827761	0.632811	0.319342	0.272532	0.668135	0.293199	0.321193	0.292814	0.279195	0.241879	0.26814	0.247933
Sol IV	NGB6715	0.618906	0.498854	0.423605	0.517248	0.728278	0.356804	0.587375	0.245768	0.176224	0.317576	0.0209036	0.244653	0.415983	0.421846	0.148633	0.438684	0.403664	0.28757	0.382783	0.414973	0.407423	0.180626	0.427509	0.243757	0.236009	0.267293	0.271014	0.321748	0.415231	0.300214	0.387825	0.336362	0.265067	0.249504	0.413471	0.215472	0.122116	0.150351	0.342331	0.414466	0.0635796	0.53806	0.501725	0.537676	0.436096	0.326309	0.411387	0.418749
Gyllen II	NGB6716	0.531112	0.586457	0.395414	0.465688	0.579042	0.381389	0.493016	0.28742	0.213413	0.299887	0.100892	0.259523	0.442406	0.394705	0.282973	0.421783	0.394378	0.385676	0.411307	0.441659	0.395249	0.256676	0.407195	0.262041	0.264008	0.343079	0.259627	0.322965	0.405945	0.319286	0.378276	0.325763	0.252893	0.291156	0.481906	0.296247	0.192914	0.199093	0.338296	0.399666	0.132277	0.441338	0.413667	0.441479	0.442039	0.355096	0.382933	0.400798
Skandia II	NGB6717	0.584118	0.461965	0.401945	0.52132	0.805345	0.350373	0.677571	0.30603	0.183972	0.310095	0.0212997	0.348764	0.379619	0.372616	0.170823	0.457985	0.412725	0.306609	0.450923	0.378872	0.39469	0.202816	0.4111	0.272248	0.249796	0.325454	0.279812	0.293262	0.381755	0.224728	0.355924	0.373256	0.274654	0.331297	0.389711	0.21613	0.180803	0.152585	0.379487	0.419588	0.0773668	0.549221	0.54597	0.5491	0.439642	0.384996	0.403118	0.460369
Gluten	NGB6718	0.350403	0.300457	0.290588	0.317275	0.354484	0.470078	0.281062	0.762876	0.632678	0.257553	0.935807	0.453503	0.287167	0.33688	0.553624	0.338751	0.29743	0.375113	0.197252	0.287733	0.367881	0.32856	0.277162	0.149601	0.151305	0.222499	0.286874	0.20396	0.292979	0.302421	0.203606	0.253496	0.243906	0.294772	0.390734	0.86334	1.04385	0.6798	0.384186	0.300091	0.657621	0.316557	0.368445	0.31696	0.359269	0.244231	0.297013	0.322492
Borg	NGB6719	0.498299	0.486164	0.330568	0.461496	0.476911	0.527125	0.420556	0.375391	0.425842	0.351098	0.581668	0.449634	0.337912	0.425698	0.26539	0.389759	0.343711	0.362579	0.306551	0.337953	0.357185	0.285042	0.377008	0.254173	0.249051	0.292937	0.248083	0.232387	0.3453	0.361831	0.359117	0.34389	0.294913	0.381752	0.354568	0.470078	0.428712	0.34798	0.309948	0.304624	0.334203	0.458939	0.415514	0.458292	0.37483	0.302591	0.317562	0.41026
Skandia III B	NGB6720	0.564358	0.446931	0.396101	0.51075	0.759853	0.38549	0.649933	0.339046	0.180754	0.305301	0.0829363	0.347122	0.359858	0.399331	0.178632	0.452666	0.40373	0.299977	0.430112	0.358849	0.391735	0.240558	0.404206	0.275857	0.246841	0.303856	0.28342	0.301071	0.374336	0.233325	0.34798	0.378965	0.266446	0.332017	0.403297	0.258599	0.232725	0.194529	0.385984	0.3909	0.0993553	0.51607	0.519383	0.515949	0.42067	0.364711	0.395436	0.423016
Hansa Svalöf	NGB6721	0.701715	0.518909	0.447598	0.599269	0.661422	0.392612	0.583011	0.318074	0.13825	0.309797	0.0485726	0.29254	0.420545	0.281732	0.144006	0.481057	0.418992	0.320753	0.450888	0.419798	0.428265	0.224837	0.522921	0.300571	0.249237	0.263453	0.323889	0.336289	0.480447	0.189509	0.326482	0.329109	0.264641	0.324435	0.469498	0.304845	0.147947	0.146249	0.368949	0.450537	0.0936117	0.702528	0.688512	0.702407	0.478994	0.321945	0.441682	0.458234
Pärl II	NGB6722	0.352064	0.380364	0.361567	0.33154	0.330676	0.378526	0.316594	0.471245	0.417193	0.340349	0.842942	0.331231	0.424314	0.33434	0.453407	0.323082	0.365521	0.358132	0.341752	0.423567	0.331207	0.303701	0.26622	0.233446	0.241453	0.302932	0.263328	0.324829	0.286238	0.401234	0.321324	0.2268	0.24898	0.315076	0.371389	0.731878	0.380153	0.461952	0.355914	0.338775	0.469706	0.399615	0.422883	0.397918	0.373271	0.334116	0.337797	0.334394
Odin	NGB6723	0.385275	0.487883	0.452019	0.428031	0.338943	0.764896	0.331688	0.760463	0.485852	0.289275	0.676075	0.397264	0.445448	0.371752	0.467714	0.510685	0.449409	0.554399	0.295667	0.446013	0.525374	0.387326	0.40656	0.170294	0.134189	0.16626	0.235361	0.143782	0.416601	0.227539	0.24373	0.299922	0.244119	0.283695	0.511992	0.571049	0.707181	0.55608	0.484701	0.453908	0.477448	0.368234	0.371021	0.367587	0.534879	0.250221	0.447416	0.497052
Robur	NGB6724	0.543635	0.424109	0.355686	0.46062	0.618611	0.377634	0.509216	0.351933	0.414988	0.312149	0.319271	0.344779	0.380097	0.364168	0.244821	0.360525	0.374343	0.342272	0.374205	0.37935	0.340817	0.276026	0.343573	0.305023	0.234258	0.28786	0.281078	0.309757	0.322893	0.273257	0.377146	0.341175	0.292199	0.3302	0.387301	0.392794	0.295238	0.362595	0.365261	0.357575	0.262433	0.460426	0.468465	0.459779	0.403361	0.389151	0.34268	0.395205
Svale	NGB6725	0.554053	0.540867	0.524696	0.647222	0.594631	0.433213	0.592103	0.357099	0.204321	0.309963	0.0340337	0.366487	0.477426	0.381937	0.19826	0.553429	0.541515	0.430936	0.573148	0.476941	0.494335	0.294846	0.633628	0.277893	0.265944	0.276484	0.264188	0.282889	0.544155	0.250853	0.307217	0.335313	0.231722	0.298081	0.475702	0.227026	0.191699	0.206805	0.490422	0.516607	0.143665	0.564844	0.551615	0.56446	0.517494	0.350467	0.513003	0.532707
Diana	NGB6726	0.48163	0.441925	0.392669	0.452703	0.409565	0.43536	0.364501	0.649124	0.428865	0.283489	0.522987	0.326098	0.36588	0.277743	0.462453	0.440045	0.328617	0.411814	0.299071	0.366445	0.416398	0.332703	0.375305	0.219911	0.20061	0.256838	0.271587	0.210991	0.377206	0.253	0.281269	0.317242	0.251724	0.243775	0.44529	0.604124	0.683803	0.469685	0.424301	0.403748	0.401556	0.491896	0.492058	0.491249	0.387568	0.314017	0.39463	0.382825
Ölve	NGB6727	0.569831	0.617037	0.548089	0.686106	0.497504	0.480763	0.498914	0.437995	0.156294	0.290031	0.0744936	0.393031	0.482964	0.375134	0.24581	0.521156	0.489288	0.460893	0.527485	0.482216	0.486482	0.325591	0.693781	0.324392	0.294588	0.243162	0.271827	0.319411	0.637129	0.254027	0.278621	0.296477	0.219931	0.339328	0.54662	0.26381	0.220343	0.16403	0.460513	0.525033	0.167058	0.586399	0.559516	0.585489	0.498613	0.279335	0.532983	0.52958
Seba	NGB6728	0.433735	0.53398	0.541966	0.531106	0.530241	0.423176	0.520099	0.426095	0.18273	0.349288	0.00955457	0.382707	0.576355	0.460648	0.258592	0.519497	0.590819	0.491529	0.575977	0.575608	0.550203	0.421345	0.509635	0.229782	0.288202	0.339704	0.314542	0.348472	0.568251	0.337703	0.320023	0.381728	0.336691	0.389658	0.596162	0.18443	0.237852	0.231427	0.525809	0.553832	0.229728	0.411705	0.445476	0.412109	0.653446	0.381916	0.54839	0.581222
Solid	NGB6730	0.428834	0.436129	0.506868	0.451109	0.487529	0.303005	0.478962	0.295947	0.276555	0.458342	0.166659	0.488347	0.603749	0.565501	0.364232	0.463131	0.596945	0.463521	0.809752	0.602477	0.517468	0.440075	0.426749	0.303652	0.365222	0.352394	0.389987	0.372453	0.505059	0.434679	0.374724	0.350307	0.33494	0.331192	0.566053	0.228366	0.189888	0.342056	0.492287	0.509545	0.31305	0.398926	0.395412	0.398279	0.582113	0.467338	0.516969	0.587873
Hildur	NGB6731	0.487402	0.576094	0.944851	0.53961	0.391706	0.441132	0.413334	0.374471	0.218804	0.305541	0.138054	0.290384	0.746078	0.390119	0.274448	0.786896	0.825396	0.664928	0.681895	0.746118	0.87563	0.304078	0.629469	0.319946	0.344232	0.186989	0.259504	0.290808	0.74979	0.220174	0.259471	0.46559	0.206033	0.250335	0.701817	0.227068	0.199618	0.242032	0.791895	0.937288	0.274467	0.47955	0.459232	0.478904	0.743347	0.372565	0.952064	0.853873
Hankkijan Ilves	NGB6773	0.213239	0.193489	0.19596	0.243129	0.177147	0.441881	0.11344	0.568472	0.85156	0.293424	1.11425	0.421893	0.270523	0.312096	0.535667	0.272743	0.245076	0.323285	0.219206	0.272139	0.233343	0.699996	0.241088	0.249013	0.220259	0.231325	0.41727	0.255847	0.24509	0.440432	0.257069	0.171997	0.395307	0.32224	0.305034	0.791031	0.922699	0.970627	0.381458	0.193648	0.960526	0.18832	0.23732	0.189774	0.21449	0.205269	0.197134	0.1743
Äring	NGB7	0.598435	0.698417	0.664654	0.641715	0.477532	0.529322	0.495747	0.447694	0.239775	0.27111	0.188433	0.318969	0.558042	0.335207	0.200106	0.658727	0.573294	0.571156	0.485195	0.557558	0.598058	0.275948	0.662519	0.239828	0.255973	0.178027	0.207743	0.253226	0.655755	0.238257	0.282017	0.356589	0.181054	0.31463	0.592816	0.262743	0.208249	0.186857	0.566313	0.637922	0.211416	0.53203	0.516175	0.531646	0.572116	0.306888	0.653486	0.611223
Dania	NGB7027	0.545521	0.487174	0.460762	0.49874	0.571659	0.324117	0.542348	0.336227	0.268259	0.356834	0.167291	0.311744	0.398788	0.308551	0.254322	0.427528	0.446336	0.351248	0.385281	0.398041	0.438804	0.333052	0.464666	0.388044	0.334346	0.336221	0.30397	0.242587	0.431645	0.240746	0.301049	0.414481	0.32218	0.350466	0.375008	0.305143	0.238833	0.272319	0.415723	0.457137	0.183447	0.543184	0.525491	0.543325	0.468527	0.359003	0.457472	0.478751
Mendel	NGB7034	0.638635	0.585539	0.520529	0.571899	0.547403	0.409616	0.627847	0.368949	0.143964	0.38483	0.0771298	0.372823	0.495052	0.356765	0.279954	0.553726	0.506628	0.434646	0.491261	0.494305	0.517739	0.327177	0.547014	0.363	0.319543	0.295424	0.276038	0.330974	0.526334	0.28082	0.32038	0.377097	0.262478	0.389227	0.493591	0.237301	0.17703	0.158527	0.465775	0.52977	0.180722	0.640236	0.62018	0.640114	0.490484	0.424547	0.528004	0.561099
Små II, Tystofte	NGB7183	0.589162	0.483027	0.410665	0.559186	0.654947	0.383775	0.620648	0.353873	0.298508	0.298334	0.185462	0.353809	0.34449	0.322783	0.225493	0.456465	0.394926	0.304564	0.395313	0.344005	0.385556	0.314201	0.483625	0.271779	0.250114	0.264856	0.285381	0.268898	0.442465	0.263906	0.329723	0.318696	0.282324	0.320849	0.392392	0.298108	0.287725	0.2792	0.407637	0.415705	0.224462	0.661657	0.651317	0.662061	0.389547	0.367985	0.4079	0.428654
Storaks Abed	NGB7184	0.535472	0.570074	0.389533	0.451406	0.583402	0.287548	0.577986	0.233227	0.160795	0.337594	0.0414472	0.262308	0.424448	0.359155	0.248736	0.396998	0.379833	0.298399	0.382846	0.423701	0.363899	0.272326	0.424158	0.338083	0.267318	0.327222	0.272127	0.319711	0.413193	0.265093	0.363731	0.359794	0.306091	0.295779	0.410121	0.264373	0.189135	0.206867	0.32874	0.410328	0.0822852	0.477469	0.462402	0.477348	0.426181	0.366546	0.377578	0.42065
Øtofte L.56	NGB7195	0.61773	0.511857	0.480194	0.564122	0.555906	0.461968	0.60878	0.410536	0.378277	0.32874	0.299365	0.392092	0.381197	0.433273	0.350949	0.465077	0.413516	0.366478	0.350098	0.382025	0.457973	0.303121	0.555517	0.340257	0.352727	0.278194	0.410575	0.305343	0.512781	0.306127	0.378508	0.384287	0.258902	0.289814	0.432775	0.279938	0.347801	0.359756	0.442769	0.474993	0.344142	0.432643	0.454861	0.433047	0.383455	0.327234	0.479529	0.412584
Kosack	NGB7482	0.454403	0.507123	0.997451	0.551774	0.341903	0.438067	0.398979	0.437836	0.242521	0.28147	0.116608	0.324078	0.900292	0.357645	0.284511	0.787769	1.12297	0.77083	0.584041	0.899545	0.976543	0.312566	0.613538	0.266467	0.298105	0.169483	0.198673	0.255709	0.710489	0.239164	0.184724	0.461737	0.178023	0.228627	0.66278	0.226366	0.215983	0.226363	0.990747	0.990412	0.202871	0.51377	0.488725	0.513386	0.954802	0.277075	1.017	0.971852
Sleipner	NGB7483	0.277705	0.283162	0.295349	0.29079	0.279948	0.21857	0.353828	0.224903	0.294259	0.728115	0.139727	0.461152	0.352844	0.44982	0.417647	0.287847	0.376498	0.386701	0.597182	0.353935	0.295709	0.669411	0.331024	1.50004	1.57579	1.0239	0.715162	0.831276	0.318746	0.671368	0.755565	0.934902	0.978876	0.714132	0.287841	0.254473	0.284001	0.315124	0.31884	0.301964	0.264325	0.30425	0.297061	0.304654	0.274493	0.714005	0.286807	0.362175
Rurik	NGB7484	0.326989	0.329558	0.204682	0.293862	0.297724	0.211401	0.397073	0.281801	0.28709	0.657404	0.246513	0.364184	0.319943	0.535076	0.517081	0.195605	0.280843	0.406577	0.560868	0.319721	0.239439	0.510214	0.248234	0.977967	0.94685	0.972619	0.674909	0.848264	0.226504	0.631378	0.804061	0.913554	0.816265	0.852953	0.265705	0.322137	0.26029	0.376486	0.222397	0.214448	0.212519	0.330428	0.330328	0.330307	0.240017	0.824205	0.199554	0.265207
Ergo	NGB8	0.582164	0.601538	0.566199	0.583696	0.436843	0.894041	0.38075	0.66091	0.418857	0.237772	0.493024	0.392761	0.496872	0.330227	0.342691	0.666876	0.469325	0.523114	0.349192	0.497963	0.543452	0.245237	0.625242	0.157652	0.155155	0.113969	0.229545	0.196783	0.624518	0.226713	0.255507	0.267061	0.163996	0.240069	0.585998	0.439725	0.421202	0.309224	0.550567	0.563361	0.37737	0.480312	0.489402	0.480191	0.526963	0.236266	0.568422	0.518807
Dronning	NGB8189	0.510997	0.587611	0.448556	0.469993	0.597788	0.326353	0.613115	0.284898	0.146824	0.33255	0.0322017	0.325532	0.493974	0.470692	0.251043	0.457071	0.476666	0.35007	0.47259	0.493226	0.429224	0.298003	0.463226	0.385553	0.342095	0.311149	0.270758	0.363242	0.474842	0.369278	0.378117	0.396236	0.297371	0.35454	0.443411	0.254602	0.177526	0.166113	0.379361	0.457797	0.0851179	0.467173	0.450531	0.46784	0.48179	0.405088	0.450255	0.461293
Konge II	NGB8194	0.478584	0.487979	0.528523	0.488781	0.593732	0.327024	0.867166	0.327318	0.169025	0.372868	0.0775094	0.311499	0.456046	0.423049	0.260379	0.496602	0.449767	0.369646	0.451467	0.455824	0.500263	0.275567	0.5235	0.38176	0.380051	0.337027	0.348362	0.347108	0.511747	0.280675	0.323385	0.407934	0.303293	0.408512	0.460624	0.245558	0.247778	0.21956	0.425456	0.518072	0.16456	0.498827	0.483235	0.499756	0.433623	0.429915	0.528121	0.488221
Stand Tystofte	NGB8197	0.661246	0.551697	0.402402	0.497621	0.574215	0.351618	0.586654	0.24137	0.193882	0.401927	0.115233	0.3592	0.369048	0.378851	0.178632	0.379409	0.367496	0.28291	0.449805	0.368826	0.404601	0.215877	0.427575	0.39769	0.387316	0.386303	0.367968	0.326803	0.380112	0.246716	0.399444	0.502898	0.323949	0.437308	0.363911	0.27094	0.174434	0.107881	0.309575	0.390113	0.1713	0.565433	0.537763	0.564262	0.399664	0.467113	0.3999	0.425642
Lantvete från Värmland	NGB8198	0.29237	0.283386	0.250935	0.302304	0.216892	0.467973	0.213577	0.584323	0.985569	0.300085	1.17448	0.362387	0.233073	0.261517	0.497692	0.255249	0.220229	0.362505	0.162588	0.233376	0.273351	0.544389	0.344638	0.252787	0.254491	0.228272	0.371155	0.205531	0.322645	0.458384	0.293401	0.238263	0.319522	0.30107	0.315371	0.740453	0.831422	0.782461	0.341908	0.252036	0.834852	0.323642	0.328005	0.323258	0.240582	0.335339	0.251058	0.257895
Gammalt svenskt lantvete	NGB8199	0.174128	0.2363	0.150548	0.232375	0.147488	0.583681	0.0900828	0.573998	0.981545	0.23672	1.8324	0.418754	0.202004	0.230974	0.650947	0.202387	0.144523	0.297827	0.0881953	0.20362	0.18793	0.43875	0.241888	0.188371	0.179573	0.215845	0.342974	0.21096	0.236962	0.487969	0.310908	0.149166	0.29738	0.331442	0.295856	0.985083	0.854968	0.825174	0.253598	0.156638	1.00412	0.210126	0.222366	0.210004	0.220016	0.217622	0.152246	0.158033
Salut	NGB8672	0.460066	0.601535	0.993661	0.573978	0.353867	0.44373	0.385211	0.435096	0.220351	0.276892	0.142751	0.327903	0.810116	0.336001	0.259715	0.738292	0.895212	0.772554	0.607559	0.809894	0.891093	0.317441	0.681692	0.255063	0.277248	0.163855	0.182805	0.269249	0.731381	0.249028	0.228459	0.432215	0.166093	0.231664	0.645336	0.238855	0.213506	0.161131	0.806833	0.980846	0.167835	0.544639	0.493863	0.543993	0.828391	0.335777	0.988532	0.899006
Borg Abed	NGB8933	0.52024	0.507054	0.434167	0.478447	0.55898	0.301461	0.722922	0.295191	0.133485	0.37015	0.0340922	0.336088	0.439411	0.406152	0.231403	0.461587	0.436283	0.327541	0.503363	0.438664	0.409321	0.304094	0.47877	0.413438	0.398863	0.321705	0.332253	0.396641	0.460191	0.324956	0.376331	0.453529	0.299524	0.436514	0.431648	0.274873	0.190182	0.129931	0.337927	0.430017	0.131383	0.52079	0.491807	0.520669	0.423815	0.427722	0.429827	0.423536
Bankuta	NGB8937	0.441084	0.466234	0.39361	0.425812	0.503194	0.437876	0.521408	0.363338	0.356286	0.357425	0.26477	0.318374	0.393603	0.45907	0.256226	0.386108	0.398876	0.39385	0.352263	0.394168	0.400534	0.381169	0.369944	0.22374	0.249601	0.294538	0.289069	0.340329	0.372895	0.405444	0.348115	0.301379	0.292051	0.334253	0.437303	0.307572	0.391452	0.435704	0.369314	0.383421	0.383592	0.422992	0.402674	0.422346	0.405838	0.40817	0.393733	0.399258
Brødtorp Pajo	NGB8946	0.324159	0.273689	0.184523	0.323066	0.245793	0.513153	0.220421	0.557559	1.05359	0.2875	1.22675	0.424109	0.209459	0.32324	0.553375	0.22901	0.198454	0.281389	0.138712	0.211075	0.204576	0.451194	0.288991	0.242564	0.214073	0.246669	0.342815	0.230494	0.275663	0.50514	0.292369	0.198633	0.349735	0.333121	0.288607	0.717102	0.772624	0.858624	0.345864	0.214507	0.941211	0.249877	0.299928	0.250018	0.219595	0.265513	0.189109	0.181768
Enger	NGB8957	0.283564	0.278781	0.221649	0.255688	0.278456	0.488575	0.236279	0.55635	1.2073	0.320425	0.980036	0.474363	0.181993	0.324131	0.574484	0.265611	0.209848	0.322453	0.18319	0.182296	0.244327	0.5516	0.287519	0.211422	0.196322	0.240996	0.383092	0.266832	0.280756	0.50393	0.278556	0.202937	0.345375	0.347404	0.290286	0.623993	0.785594	0.943013	0.332051	0.229839	0.958907	0.261797	0.261433	0.261412	0.213922	0.268767	0.220984	0.223095
Haukiala Pirola	NGB8968	0.221605	0.218135	0.156801	0.270662	0.167658	0.527443	0.173795	0.580514	1.06736	0.316494	1.01181	0.437611	0.181475	0.38558	0.595234	0.16059	0.179922	0.375763	0.134885	0.182304	0.164776	0.649809	0.296717	0.246877	0.219961	0.244417	0.450843	0.347449	0.286277	0.591111	0.327402	0.143079	0.351947	0.348724	0.316026	0.710911	0.872512	0.998686	0.333897	0.16578	1.61665	0.169379	0.223106	0.169783	0.164566	0.291356	0.153773	0.14932
Ideal	NGB8973	0.492538	0.507972	0.494164	0.495645	0.662301	0.340452	0.812852	0.309763	0.184554	0.347962	0.0925134	0.309173	0.414073	0.377137	0.21998	0.492176	0.421447	0.327409	0.428136	0.413851	0.476932	0.236744	0.540605	0.39335	0.401357	0.34993	0.355752	0.321939	0.492092	0.280712	0.327361	0.385128	0.304906	0.392533	0.423639	0.274741	0.287201	0.244804	0.401337	0.489751	0.137553	0.540614	0.497714	0.541542	0.383772	0.393456	0.493237	0.449136
Sammets	NGB8999	0.228229	0.189312	0.130342	0.246041	0.140673	0.558224	0.121341	0.608932	1.06742	0.262727	1.65806	0.473643	0.163418	0.27641	0.640719	0.202136	0.151625	0.296789	0.154113	0.164771	0.1693	0.444013	0.252403	0.194685	0.157266	0.208768	0.323556	0.225413	0.2396	0.45516	0.280199	0.167295	0.351744	0.321477	0.278013	0.896609	0.872835	0.895293	0.299298	0.141421	1.03565	0.206199	0.252836	0.206078	0.22528	0.253343	0.126264	0.155157
Standard II	NGB9	0.662819	0.466884	0.428394	0.578752	0.441351	0.607622	0.421756	0.539647	0.463802	0.281666	0.492019	0.364448	0.347777	0.261741	0.27473	0.519619	0.39375	0.388198	0.37103	0.348343	0.428754	0.288343	0.50503	0.238306	0.253139	0.224294	0.295758	0.264833	0.46492	0.273758	0.270518	0.294939	0.260142	0.289215	0.44373	0.458938	0.364532	0.379113	0.435869	0.43921	0.412337	0.837716	0.882515	0.836544	0.416203	0.342914	0.435869	0.417499
Trifolium 14	NGB9016	0.50202	0.525332	0.450082	0.495675	0.615068	0.336281	0.786624	0.326598	0.230009	0.353243	0.111974	0.31603	0.405963	0.392396	0.336067	0.466999	0.375002	0.296981	0.438144	0.405741	0.428124	0.342065	0.516216	0.395744	0.348347	0.341033	0.383877	0.339298	0.492385	0.321178	0.341045	0.41089	0.307299	0.42092	0.406339	0.300502	0.253097	0.257963	0.38535	0.43648	0.212153	0.473426	0.459409	0.474092	0.369623	0.455452	0.44968	0.398752
Tystofte Stakket	NGB9017	0.533596	0.484964	0.385557	0.521475	0.581002	0.355779	0.641228	0.290693	0.156557	0.383244	0.036946	0.361785	0.399466	0.462045	0.176491	0.397748	0.422857	0.324093	0.551117	0.398719	0.367275	0.26625	0.440663	0.322291	0.296951	0.360006	0.364514	0.394506	0.406066	0.276083	0.343476	0.378924	0.349116	0.403658	0.413496	0.270112	0.18831	0.243852	0.357323	0.371167	0.128723	0.502376	0.530633	0.502779	0.45949	0.475738	0.38358	0.403546
Varma Tammisto	NGB9020	0.227571	0.217536	0.214756	0.239606	0.218261	0.439934	0.135123	0.591468	0.790797	0.289638	1.30319	0.376358	0.239955	0.21221	0.505624	0.289964	0.199542	0.299806	0.184175	0.241834	0.245049	0.472237	0.267498	0.285401	0.252446	0.240405	0.392479	0.187995	0.259684	0.300635	0.228339	0.182653	0.307761	0.341824	0.297047	0.940587	0.854584	0.795907	0.341963	0.214282	0.837533	0.278798	0.295502	0.279989	0.21333	0.272115	0.211728	0.199398
Hallandsvete	NGB9057	0.456858	0.483321	0.471088	0.461803	0.522118	0.400874	0.48073	0.325022	0.318495	0.379238	0.268466	0.276645	0.427231	0.316251	0.30062	0.463848	0.397321	0.326652	0.383004	0.427009	0.456219	0.316858	0.446634	0.337716	0.308174	0.267251	0.393329	0.332734	0.442496	0.302798	0.393296	0.352862	0.30021	0.372345	0.410015	0.383212	0.361539	0.332796	0.411082	0.436742	0.264142	0.467912	0.467286	0.468578	0.396143	0.324955	0.459133	0.387461
Mendel II	NGB9062	0.538957	0.435972	0.350482	0.474321	0.664871	0.298123	0.588298	0.259031	0.251979	0.376526	0.144709	0.422286	0.32343	0.33297	0.229115	0.370025	0.385419	0.289806	0.43727	0.323208	0.336926	0.261108	0.371979	0.313999	0.329094	0.370618	0.3213	0.33685	0.339746	0.380696	0.319691	0.347525	0.353951	0.359656	0.351902	0.362384	0.262727	0.283347	0.342991	0.368651	0.261168	0.52034	0.55096	0.521532	0.400258	0.424908	0.35008	0.411532
Nana	NGB9118	0.373344	0.3297	0.285696	0.326563	0.426001	0.240164	0.475724	0.171402	0.226054	0.601093	0.118259	0.37798	0.288577	0.654425	0.277759	0.267166	0.305929	0.364183	0.57729	0.28783	0.287369	0.362267	0.3324	0.689281	0.676544	0.757979	0.619912	0.817948	0.292552	0.701889	0.555549	0.666092	0.644686	0.761721	0.272674	0.23957	0.169583	0.273176	0.259562	0.269468	0.180365	0.428772	0.389548	0.429701	0.314204	0.614554	0.273216	0.34307
Sarah	NGB9119	0.295184	0.292238	0.262151	0.252341	0.357293	0.257054	0.436687	0.231091	0.25686	0.702794	0.116769	0.514078	0.3354	0.748249	0.397052	0.252285	0.30654	0.349564	0.53904	0.335178	0.277477	0.548252	0.252926	0.617685	0.620965	0.588444	0.552779	0.873436	0.239598	0.594846	0.634143	0.544608	0.679431	0.520504	0.294028	0.266437	0.22901	0.336803	0.241268	0.253274	0.273663	0.346935	0.349198	0.346289	0.316653	0.715466	0.263324	0.296156
Anja	NGB9122	0.338295	0.313293	0.282156	0.312519	0.350778	0.286774	0.398663	0.263174	0.278966	0.748006	0.164081	0.873324	0.296589	0.718365	0.596918	0.273341	0.307377	0.355653	0.520709	0.295842	0.277264	0.482659	0.311004	0.579662	0.580053	0.635493	0.522633	0.868234	0.289799	0.603035	0.575902	0.471137	0.551609	0.510576	0.318234	0.231302	0.211467	0.344992	0.282804	0.270916	0.291568	0.341996	0.356862	0.341612	0.299635	0.666153	0.280966	0.320362
Kraka	NGB9123	0.282543	0.257541	0.244783	0.266482	0.31997	0.307692	0.369956	0.25731	0.314588	0.874478	0.208106	1.20854	0.262893	0.800988	0.705798	0.234656	0.27762	0.315392	0.517471	0.262146	0.223875	0.557667	0.326671	0.577737	0.55686	0.627267	0.562194	1.04932	0.284985	0.648898	0.617826	0.44138	0.613751	0.523355	0.295304	0.227014	0.265732	0.347794	0.211823	0.221466	0.34347	0.309613	0.336032	0.310279	0.268302	0.627993	0.239918	0.248593
Tjelvar	NGB9952	0.396209	0.521923	0.931379	0.503557	0.32572	0.459694	0.397762	0.443971	0.281477	0.313862	0.201777	0.39323	0.863366	0.300238	0.422194	0.81596	0.895684	0.696881	0.551053	0.863931	0.877649	0.435545	0.614159	0.45929	0.46966	0.336311	0.313775	0.30937	0.714787	0.261842	0.295887	0.477063	0.301527	0.273885	0.642133	0.268998	0.273582	0.263744	0.825949	0.914888	0.294342	0.399123	0.407424	0.399264	0.759545	0.263255	0.948832	0.80968
[truncated: 112 more columns]
