# Supplementary material for: Genome-Wide Association Analysis of Freezing Tolerance and Winter Hardiness in Winter Wheat of Nordic Origin
Source: Plants (Basel). 2023 Nov 29;12(23):4014. doi: 10.3390/plants12234014 (PMC10708462; doi:10.3390/plants12234014)
Supplement: Supplementary file 1 [file plants-12-04014-s001.zip › Table S5.xlsx]

## Sheet: Supplementary Table 5
Table S5. A kinship matrix of 74 winter wheat cultivars and landraces of Nordic origin, used to assess overwintering in the field.
		Iduna	Eroica	Virtus	Stava	Björke	Aros	Rudolf Rubin	Eroica II	Ertus	Starke	Trond	Thor	Norre	Starke II	Holme	Walde	Folke	Holger	Jarl	Jyvä	Ankar	Borstvete från Gotland	Storvik sjundeå	Saxo	Hunsballe R	Ankar II	Skandia	Lading Skæghvede	Lantvete från Halland	Lantvete från Uppsala	Extra squarehead	Bore	Pudel	Renodlat Sammetsvete	Sol	Sol II	Thule II	Pansar II	Svea I	Pansar III	Kron	Stål	Thule III	Sol IV	Gyllen II	Skandia II	Pärl II	Odin
		NGB1	NGB12	NGB13	NGB13479	NGB13659	NGB14	NGB14118	NGB15	NGB17	NGB18	NGB19	NGB20	NGB21	NGB22	NGB23	NGB24	NGB2434	NGB2435	NGB3	NGB348	NGB4	NGB4494	NGB4783	NGB5	NGB5153	NGB6	NGB6383	NGB6388	NGB6691	NGB6692	NGB6694	NGB6695	NGB6698	NGB6699	NGB6700	NGB6701	NGB6702	NGB6703	NGB6704	NGB6707	NGB6708	NGB6709	NGB6714	NGB6715	NGB6716	NGB6717	NGB6722	NGB6723
Iduna	NGB1	1.08282	0.729986	0.460081	0.384004	0.219583	0.556371	0.482311	0.579068	0.478644	0.52165	0.70511	0.703939	0.456894	0.49494	0.447162	0.512643	0.434529	0.375809	1.11756	0.216076	0.635618	0.328469	0.191252	0.674471	0.559984	0.469068	0.582632	0.324224	0.396695	0.305518	0.900273	0.370669	0.45964	0.212051	0.393777	0.673649	0.393793	0.550143	0.247154	0.582398	0.575404	0.557396	0.31129	0.618906	0.531112	0.584118	0.352064	0.385275
Eroica	NGB12	0.729986	0.937153	0.505987	0.487939	0.270215	0.622233	0.593072	0.746544	0.54293	0.602478	0.622357	0.622236	0.529058	0.603863	0.535343	0.566952	0.554743	0.450598	0.735741	0.216558	0.584636	0.321861	0.224292	0.597494	0.509789	0.549109	0.519572	0.298711	0.369081	0.306788	0.645273	0.408436	0.471675	0.221197	0.36485	0.554135	0.371956	0.463713	0.249211	0.480215	0.48346	0.452061	0.294442	0.517248	0.465688	0.52132	0.33154	0.428031
Virtus	NGB13	0.460081	0.505987	1.12683	0.382929	0.586631	0.546368	0.480973	0.456684	0.553976	0.467798	0.483738	0.483091	0.397002	0.47811	0.384645	0.463254	0.429777	0.393376	0.449557	0.627762	0.534503	0.540075	0.556462	0.490121	0.305265	0.716122	0.30507	0.568914	0.275887	0.470912	0.449938	0.439699	0.410251	0.576998	0.312092	0.29132	0.522427	0.273105	0.847628	0.284093	0.274735	0.248062	0.651819	0.245768	0.28742	0.30603	0.471245	0.760463
Stava	NGB13479	0.384004	0.487939	0.382929	1.21874	0.288157	0.691901	0.816082	0.583575	0.660912	0.830477	0.4137	0.413054	0.889917	0.844728	0.888325	0.760553	0.813462	0.925676	0.381883	0.228723	0.395934	0.216919	0.166614	0.411944	0.390669	0.549984	0.378659	0.260463	0.404353	0.294271	0.390666	0.36126	0.391678	0.16877	0.345245	0.365697	0.311127	0.42599	0.329907	0.397592	0.414491	0.39412	0.302406	0.415983	0.442406	0.379619	0.424314	0.445448
Björke	NGB13659	0.219583	0.270215	0.586631	0.288157	1.73498	0.299043	0.302966	0.314387	0.357327	0.286378	0.243502	0.244431	0.230549	0.290651	0.229745	0.334349	0.328704	0.281012	0.217461	0.555309	0.353608	0.528276	0.64444	0.348086	0.16927	0.415758	0.169337	0.499087	0.239143	0.420515	0.256178	0.369872	0.310753	0.5694	0.342566	0.158738	0.395622	0.241351	0.585074	0.201399	0.161583	0.189788	0.556522	0.148633	0.282973	0.170823	0.453407	0.467714
Aros	NGB14	0.556371	0.622233	0.546368	0.691901	0.299043	1.08774	0.886833	0.70369	0.685451	0.918821	0.551408	0.551286	0.746936	0.941999	0.741143	0.789031	0.804655	0.744885	0.602037	0.232782	0.513686	0.243822	0.157281	0.493986	0.452756	0.61811	0.457812	0.323075	0.410775	0.334827	0.541764	0.373458	0.454552	0.206963	0.313068	0.420169	0.354834	0.401691	0.352346	0.389572	0.409885	0.397391	0.308828	0.438684	0.421783	0.457985	0.323082	0.510685
Rudolf Rubin	NGB14118	0.482311	0.593072	0.480973	0.816082	0.302966	0.886833	1.12358	0.677418	0.707229	1.02488	0.495202	0.495081	0.92048	1.07432	0.941732	0.972553	1.08585	0.857775	0.528502	0.165023	0.486889	0.184203	0.165669	0.473753	0.393925	0.634637	0.393205	0.286562	0.360084	0.268119	0.483984	0.343247	0.424341	0.151283	0.301238	0.370003	0.307556	0.416905	0.309794	0.390608	0.420635	0.370069	0.28597	0.407423	0.395249	0.39469	0.331207	0.525374
Eroica II	NGB15	0.579068	0.746544	0.456684	0.583575	0.314387	0.70369	0.677418	1.09824	0.597605	0.732773	0.505573	0.505714	0.569028	0.734421	0.635705	0.709588	0.67296	0.508687	0.601365	0.182221	0.500935	0.316407	0.259537	0.532962	0.40167	0.590918	0.409352	0.334481	0.376231	0.327066	0.528489	0.388803	0.470947	0.210754	0.35362	0.45862	0.335256	0.387628	0.260299	0.371308	0.397397	0.393831	0.272709	0.427509	0.407195	0.4111	0.26622	0.40656
Ertus	NGB17	0.478644	0.54293	0.553976	0.660912	0.357327	0.685451	0.707229	0.597605	0.91835	0.710596	0.46239	0.461481	0.731963	0.70988	0.68022	0.670606	0.694632	0.65718	0.494902	0.261921	0.467467	0.280838	0.286723	0.461421	0.390258	0.698713	0.389538	0.364817	0.372696	0.355302	0.478742	0.388681	0.45901	0.252119	0.387107	0.397319	0.370057	0.433981	0.37177	0.401907	0.421695	0.406838	0.384968	0.413471	0.481906	0.389711	0.371389	0.511992
Starke	NGB18	0.52165	0.602478	0.467798	0.830477	0.286378	0.918821	1.02488	0.732773	0.710596	1.09135	0.530078	0.529956	0.900216	1.14359	0.950088	0.970143	0.984979	0.826483	0.538434	0.139508	0.492094	0.207525	0.143304	0.450337	0.417773	0.663735	0.419153	0.273125	0.375266	0.270961	0.491027	0.352391	0.427971	0.126029	0.33375	0.390174	0.297007	0.396903	0.282441	0.379533	0.39827	0.368184	0.272532	0.414466	0.399666	0.419588	0.338775	0.453908
Trond	NGB19	0.70511	0.622357	0.483738	0.4137	0.243502	0.551408	0.495202	0.505573	0.46239	0.530078	1.14815	1.29317	0.444579	0.513083	0.509942	0.52816	0.427203	0.439902	0.683559	0.251286	0.91108	0.314578	0.142965	0.605965	0.537691	0.437585	0.549312	0.320573	0.46814	0.354382	0.557118	0.333934	0.446274	0.230456	0.410607	0.533199	0.373601	0.456956	0.343806	0.473195	0.482742	0.484952	0.293199	0.53806	0.441338	0.549221	0.399615	0.368234
Thor	NGB20	0.703939	0.622236	0.483091	0.413054	0.244431	0.551286	0.495081	0.505714	0.461481	0.529956	1.29317	1.14739	0.443932	0.513224	0.509296	0.527514	0.426819	0.439255	0.682912	0.253265	0.909908	0.315244	0.143106	0.605319	0.537569	0.437989	0.54919	0.32124	0.468018	0.354523	0.556734	0.334338	0.446415	0.23086	0.410748	0.53334	0.372954	0.457097	0.344209	0.473598	0.482095	0.484305	0.292814	0.537676	0.441479	0.5491	0.397918	0.367587
Norre	NGB21	0.456894	0.529058	0.397002	0.889917	0.230549	0.746936	0.92048	0.569028	0.731963	0.900216	0.444579	0.443932	1.14276	0.886371	1.00559	0.788806	0.956983	1.0474	0.475778	0.192646	0.411846	0.229155	0.13185	0.424704	0.441503	0.606594	0.438157	0.271386	0.400835	0.305194	0.446226	0.333585	0.428595	0.171816	0.353804	0.385547	0.323888	0.465533	0.2744	0.43766	0.43828	0.396903	0.279195	0.436096	0.442039	0.439642	0.373271	0.534879
Starke II	NGB22	0.49494	0.603863	0.47811	0.844728	0.290651	0.941999	1.07432	0.734421	0.70988	1.14359	0.513083	0.513224	0.886371	1.09769	0.951998	0.972316	1.00343	0.835745	0.542182	0.140367	0.482451	0.179502	0.141275	0.455398	0.401565	0.682712	0.402683	0.290264	0.378226	0.269195	0.491099	0.337234	0.439859	0.117437	0.317017	0.392872	0.295766	0.409579	0.276473	0.398248	0.413571	0.376396	0.26814	0.411387	0.382933	0.403118	0.337797	0.447416
Holme	NGB23	0.447162	0.535343	0.384645	0.888325	0.229745	0.741143	0.941732	0.635705	0.68022	0.950088	0.509942	0.509296	1.00559	0.951998	1.11116	0.80113	0.947252	0.941571	0.469197	0.123311	0.456466	0.165859	0.142598	0.434666	0.460392	0.602376	0.459409	0.243011	0.382963	0.277083	0.428355	0.306524	0.39602	0.13609	0.365866	0.381067	0.304966	0.441623	0.25259	0.405348	0.441677	0.384284	0.247933	0.418749	0.400798	0.460369	0.334394	0.497052
Walde	NGB24	0.512643	0.566952	0.463254	0.760553	0.334349	0.789031	0.972553	0.709588	0.670606	0.970143	0.52816	0.527514	0.788806	0.972316	0.80113	1.11501	0.994352	0.687503	0.545706	0.15597	0.512495	0.261798	0.19285	0.51485	0.380933	0.599063	0.373649	0.283548	0.365471	0.310267	0.518517	0.385658	0.444171	0.220213	0.316341	0.409525	0.329486	0.41179	0.247177	0.387331	0.403705	0.37887	0.276654	0.430403	0.414553	0.374084	0.351824	0.443589
Folke	NGB2434	0.434529	0.554743	0.429777	0.813462	0.328704	0.804655	1.08585	0.67296	0.694632	0.984979	0.427203	0.426819	0.956983	1.00343	0.947252	0.994352	1.12846	0.864345	0.47757	0.164242	0.442783	0.237248	0.169876	0.445664	0.376601	0.637006	0.373781	0.298384	0.3509	0.301734	0.461671	0.376075	0.45218	0.204328	0.303607	0.371059	0.369529	0.399582	0.321354	0.380899	0.400161	0.348544	0.355557	0.400339	0.389215	0.374741	0.347755	0.521967
Holger	NGB2435	0.375809	0.450598	0.393376	0.925676	0.281012	0.744885	0.857775	0.508687	0.65718	0.826483	0.439902	0.439255	1.0474	0.835745	0.941571	0.687503	0.864345	1.18961	0.39128	0.271992	0.40008	0.235506	0.163145	0.383793	0.410307	0.559381	0.407223	0.331564	0.37804	0.298679	0.390348	0.324182	0.428382	0.24381	0.357005	0.333345	0.326826	0.412281	0.337466	0.371542	0.401045	0.355467	0.336748	0.374703	0.407954	0.408183	0.38041	0.542018
Jarl	NGB3	1.11756	0.735741	0.449557	0.381883	0.217461	0.602037	0.528502	0.601365	0.494902	0.538434	0.683559	0.682912	0.475778	0.542182	0.469197	0.545706	0.47757	0.39128	1.07031	0.192161	0.635072	0.314269	0.164711	0.698606	0.549985	0.493204	0.567908	0.334443	0.397462	0.296307	0.92362	0.376687	0.487976	0.20284	0.359621	0.691482	0.404275	0.562725	0.234792	0.598394	0.592187	0.550023	0.298141	0.614947	0.49932	0.569393	0.34259	0.382629
Jyvä	NGB348	0.216076	0.216558	0.627762	0.228723	0.555309	0.232782	0.165023	0.182221	0.261921	0.139508	0.251286	0.253265	0.192646	0.140367	0.123311	0.15597	0.164242	0.271992	0.192161	1.64791	0.316492	0.702792	0.960482	0.293116	0.123489	0.328491	0.131696	0.767604	0.252179	0.605272	0.225364	0.517869	0.373677	0.927716	0.43096	0.194355	0.661251	0.143581	1.09831	0.204195	0.10635	0.124314	0.910112	0.10364	0.182053	0.13397	0.543376	0.57685
Ankar	NGB4	0.635618	0.584636	0.534503	0.395934	0.353608	0.513686	0.486889	0.500935	0.467467	0.492094	0.91108	0.909908	0.411846	0.482451	0.456466	0.512495	0.442783	0.40008	0.635072	0.316492	0.906786	0.416019	0.292456	0.797468	0.437477	0.479948	0.443321	0.393131	0.41834	0.379677	0.56167	0.40518	0.431921	0.330584	0.384438	0.473684	0.408349	0.448379	0.401135	0.486937	0.420863	0.406532	0.3416	0.436271	0.405717	0.443494	0.388413	0.430814
Borstvete från Gotland	NGB4494	0.328469	0.321861	0.540075	0.216919	0.528276	0.243822	0.184203	0.316407	0.280838	0.207525	0.314578	0.315244	0.229155	0.179502	0.165859	0.261798	0.237248	0.235506	0.314269	0.702792	0.416019	1.70465	0.946578	0.425201	0.187043	0.296469	0.185798	0.573313	0.392141	0.648083	0.338544	0.649954	0.243192	1.08002	0.417318	0.243468	0.565424	0.247571	0.671904	0.257246	0.186971	0.194958	0.629174	0.164831	0.238518	0.185183	0.465142	0.491264
Storvik sjundeå	NGB4783	0.191252	0.224292	0.556462	0.166614	0.64444	0.157281	0.165669	0.259537	0.286723	0.143304	0.142965	0.143106	0.13185	0.141275	0.142598	0.19285	0.169876	0.163145	0.164711	0.960482	0.292456	0.946578	1.8048	0.287459	0.0466761	0.37036	0.0404419	0.586813	0.242059	0.647666	0.206841	0.534531	0.222031	1.03103	0.618555	0.139072	0.551354	0.120858	0.791744	0.153638	0.0752243	0.115245	0.676282	0.0585983	0.130184	0.0393016	0.502535	0.511852
Saxo	NGB5	0.674471	0.597494	0.490121	0.411944	0.348086	0.493986	0.473753	0.532962	0.461421	0.450337	0.605965	0.605319	0.424704	0.455398	0.434666	0.51485	0.445664	0.383793	0.698606	0.293116	0.797468	0.425201	0.287459	0.933478	0.43852	0.465236	0.447253	0.388923	0.422533	0.375469	0.622054	0.44377	0.419836	0.325588	0.376291	0.515162	0.403615	0.508238	0.297937	0.537868	0.484398	0.4551	0.305358	0.464884	0.476078	0.447688	0.390243	0.42503
Hunsballe R	NGB5153	0.559984	0.509789	0.305265	0.390669	0.16927	0.452756	0.393925	0.40167	0.390258	0.417773	0.537691	0.537569	0.441503	0.401565	0.460392	0.380933	0.376601	0.410307	0.549985	0.123489	0.437477	0.187043	0.0466761	0.43852	1.05237	0.363878	1.15041	0.247916	0.566416	0.32006	0.589489	0.381535	0.539037	0.0790278	0.498905	0.742017	0.316173	0.649495	0.160869	0.646304	0.778996	0.72134	0.188245	0.775236	0.632564	1.14953	0.295974	0.305554
Ankar II	NGB6	0.469068	0.549109	0.716122	0.549984	0.415758	0.61811	0.634637	0.590918	0.698713	0.663735	0.437585	0.437989	0.606594	0.682712	0.602376	0.599063	0.637006	0.559381	0.493204	0.328491	0.479948	0.296469	0.37036	0.465236	0.363878	1.08189	0.367622	0.428762	0.351042	0.353603	0.497524	0.415078	0.508513	0.253309	0.348649	0.390369	0.370196	0.373205	0.460659	0.372639	0.372733	0.347374	0.407426	0.382365	0.424542	0.368582	0.374942	0.569109
Skandia	NGB6383	0.582632	0.519572	0.30507	0.378659	0.169337	0.457812	0.393205	0.409352	0.389538	0.419153	0.549312	0.54919	0.438157	0.402683	0.459409	0.373649	0.373781	0.407223	0.567908	0.131696	0.443321	0.185798	0.0404419	0.447253	1.15041	0.367622	1.08209	0.254286	0.548104	0.307262	0.608199	0.376351	0.551445	0.0701679	0.510526	0.760727	0.319391	0.645099	0.171439	0.643745	0.780114	0.717469	0.197503	0.779242	0.641034	1.20474	0.280288	0.305622
Lading Skæghvede	NGB6388	0.324224	0.298711	0.568914	0.260463	0.499087	0.323075	0.286562	0.334481	0.364817	0.273125	0.320573	0.32124	0.271386	0.290264	0.243011	0.283548	0.298384	0.331564	0.334443	0.767604	0.393131	0.573313	0.586813	0.388923	0.247916	0.428762	0.254286	1.16273	0.359801	0.609704	0.335349	0.492893	0.666412	0.796662	0.433816	0.293313	0.678549	0.312908	0.796844	0.326784	0.272526	0.292591	0.876472	0.250386	0.312519	0.252883	0.652311	0.597562
Lantvete från Halland	NGB6691	0.396695	0.369081	0.275887	0.404353	0.239143	0.410775	0.360084	0.376231	0.372696	0.375266	0.46814	0.468018	0.400835	0.378226	0.382963	0.365471	0.3509	0.37804	0.397462	0.252179	0.41834	0.392141	0.242059	0.422533	0.566416	0.351042	0.548104	0.359801	1.22647	0.780639	0.420949	0.486856	0.45662	0.293316	0.50655	0.56665	0.357689	0.616966	0.219715	0.573076	0.58735	0.61004	0.240002	0.620087	0.585332	0.546701	0.475078	0.317137
Lantvete från Uppsala	NGB6692	0.305518	0.306788	0.470912	0.294271	0.420515	0.334827	0.268119	0.327066	0.355302	0.270961	0.354382	0.354523	0.305194	0.269195	0.277083	0.310267	0.301734	0.298679	0.296307	0.605272	0.379677	0.648083	0.647666	0.375469	0.32006	0.353603	0.307262	0.609704	0.780639	0.966553	0.335024	0.55611	0.42741	0.806052	0.444256	0.360205	0.560329	0.383739	0.563618	0.37267	0.335742	0.348455	0.595195	0.339334	0.362345	0.308222	0.622315	0.479867
Extra squarehead	NGB6694	0.900273	0.645273	0.449938	0.390666	0.256178	0.541764	0.483984	0.528489	0.478742	0.491027	0.557118	0.556734	0.446226	0.491099	0.428355	0.518517	0.461671	0.390348	0.92362	0.225364	0.56167	0.338544	0.206841	0.622054	0.589489	0.497524	0.608199	0.335349	0.420949	0.335024	0.968744	0.430107	0.503587	0.230266	0.375232	0.740702	0.414634	0.57886	0.265632	0.598775	0.603859	0.591627	0.33922	0.628981	0.557991	0.609947	0.380519	0.436049
Bore	NGB6695	0.370669	0.408436	0.439699	0.36126	0.369872	0.373458	0.343247	0.388803	0.388681	0.352391	0.333934	0.334338	0.333585	0.337234	0.306524	0.385658	0.376075	0.324182	0.376687	0.517869	0.40518	0.649954	0.534531	0.44377	0.381535	0.415078	0.376351	0.492893	0.486856	0.55611	0.430107	0.907933	0.414839	0.67585	0.436937	0.418004	0.50706	0.389286	0.473852	0.426793	0.39958	0.412293	0.51777	0.404485	0.419881	0.377836	0.531761	0.459157
Pudel	NGB6698	0.45964	0.471675	0.410251	0.391678	0.310753	0.454552	0.424341	0.470947	0.45901	0.427971	0.446274	0.446415	0.428595	0.439859	0.39602	0.444171	0.45218	0.428382	0.487976	0.373677	0.431921	0.243192	0.222031	0.419836	0.539037	0.508513	0.551445	0.666412	0.45662	0.42741	0.503587	0.414839	1.04685	0.248081	0.476807	0.550824	0.557958	0.51738	0.490616	0.504211	0.536864	0.536974	0.532696	0.555423	0.544036	0.551355	0.514129	0.576223
Renodlat Sammetsvete	NGB6699	0.212051	0.221197	0.576998	0.16877	0.5694	0.206963	0.151283	0.210754	0.252119	0.126029	0.230456	0.23086	0.171816	0.117437	0.13609	0.220213	0.204328	0.24381	0.20284	0.927716	0.330584	1.08002	1.03103	0.325588	0.0790278	0.253309	0.0701679	0.796662	0.293316	0.806052	0.230266	0.67585	0.248081	1.59204	0.362867	0.131776	0.7507	0.150321	0.820945	0.184677	0.0897212	0.110049	1.07728	0.0578661	0.123938	0.0700779	0.709496	0.613523
Sol	NGB6700	0.393777	0.36485	0.312092	0.345245	0.342566	0.313068	0.301238	0.35362	0.387107	0.33375	0.410607	0.410748	0.353804	0.317017	0.365866	0.316341	0.303607	0.357005	0.359621	0.43096	0.384438	0.417318	0.618555	0.376291	0.498905	0.348649	0.510526	0.433816	0.50655	0.444256	0.375232	0.436937	0.476807	0.362867	1.00403	0.555855	0.415424	0.521098	0.351233	0.433096	0.5587	0.617887	0.368631	0.633186	0.654358	0.510961	0.459818	0.307392
Sol II	NGB6701	0.673649	0.554135	0.29132	0.365697	0.158738	0.420169	0.370003	0.45862	0.397319	0.390174	0.533199	0.53334	0.385547	0.392872	0.381067	0.409525	0.371059	0.333345	0.691482	0.194355	0.473684	0.243468	0.139072	0.515162	0.742017	0.390369	0.760727	0.293313	0.56665	0.360205	0.740702	0.418004	0.550824	0.131776	0.555855	0.931867	0.38415	0.677299	0.196813	0.62737	0.768728	0.788793	0.22734	0.879186	0.712357	0.762213	0.415678	0.317079
Thule II	NGB6702	0.393793	0.371956	0.522427	0.311127	0.395622	0.354834	0.307556	0.335256	0.370057	0.297007	0.373601	0.372954	0.323888	0.295766	0.304966	0.329486	0.369529	0.326826	0.404275	0.661251	0.408349	0.565424	0.551354	0.403615	0.316173	0.370196	0.319391	0.678549	0.357689	0.560329	0.414634	0.50706	0.557958	0.7507	0.415424	0.38415	0.974815	0.427114	0.7732	0.432325	0.419291	0.397345	0.834711	0.358028	0.39653	0.318513	0.631556	0.546348
Pansar II	NGB6703	0.550143	0.463713	0.273105	0.42599	0.241351	0.401691	0.416905	0.387628	0.433981	0.396903	0.456956	0.457097	0.465533	0.409579	0.441623	0.41179	0.399582	0.412281	0.562725	0.143581	0.448379	0.247571	0.120858	0.508238	0.649495	0.373205	0.645099	0.312908	0.616966	0.383739	0.57886	0.389286	0.51738	0.150321	0.521098	0.677299	0.427114	1.07128	0.168357	0.89667	0.91672	0.874031	0.210963	0.801893	0.968792	0.644221	0.387485	0.331948
Svea I	NGB6704	0.247154	0.249211	0.847628	0.329907	0.585074	0.352346	0.309794	0.260299	0.37177	0.282441	0.343806	0.344209	0.2744	0.276473	0.25259	0.247177	0.321354	0.337466	0.234792	1.09831	0.401135	0.671904	0.791744	0.297937	0.160869	0.460659	0.171439	0.796844	0.219715	0.563618	0.265632	0.473852	0.490616	0.820945	0.351233	0.196813	0.7732	0.168357	1.5732	0.245513	0.161059	0.151191	1.08797	0.115813	0.18241	0.171349	0.584694	0.72556
Pansar III	NGB6707	0.582398	0.480215	0.284093	0.397592	0.201399	0.389572	0.390608	0.371308	0.401907	0.379533	0.473195	0.473598	0.43766	0.398248	0.405348	0.387331	0.380899	0.371542	0.598394	0.204195	0.486937	0.257246	0.153638	0.537868	0.646304	0.372639	0.643745	0.326784	0.573076	0.37267	0.598775	0.426793	0.504211	0.184677	0.433096	0.62737	0.432325	0.89667	0.245513	1.07141	0.815065	0.795744	0.276565	0.684746	0.57542	0.642343	0.380881	0.307488
Kron	NGB6708	0.575404	0.48346	0.274735	0.414491	0.161583	0.409885	0.420635	0.397397	0.421695	0.39827	0.482742	0.482095	0.43828	0.413571	0.441677	0.403705	0.400161	0.401045	0.592187	0.10635	0.420863	0.186971	0.0752243	0.484398	0.778996	0.372733	0.780114	0.272526	0.58735	0.335742	0.603859	0.39958	0.536864	0.0897212	0.5587	0.768728	0.419291	0.91672	0.161059	0.815065	1.10937	1.0101	0.226509	0.998875	0.851739	0.780024	0.412746	0.332002
Stål	NGB6709	0.557396	0.452061	0.248062	0.39412	0.189788	0.397391	0.370069	0.393831	0.406838	0.368184	0.484952	0.484305	0.396903	0.376396	0.384284	0.37887	0.348544	0.355467	0.550023	0.124314	0.406532	0.194958	0.115245	0.4551	0.72134	0.347374	0.717469	0.292591	0.61004	0.348455	0.591627	0.412293	0.536974	0.110049	0.617887	0.788793	0.397345	0.874031	0.151191	0.795744	1.0101	1.13019	0.199836	0.995308	0.835832	0.717379	0.430185	0.29115
Thule III	NGB6714	0.31129	0.294442	0.651819	0.302406	0.556522	0.308828	0.28597	0.272709	0.384968	0.272532	0.293199	0.292814	0.279195	0.26814	0.247933	0.276654	0.355557	0.336748	0.298141	0.910112	0.3416	0.629174	0.676282	0.305358	0.188245	0.407426	0.197503	0.876472	0.240002	0.595195	0.33922	0.51777	0.532696	1.07728	0.368631	0.22734	0.834711	0.210963	1.08797	0.276565	0.226509	0.199836	1.48423	0.166821	0.231317	0.196888	0.751495	0.681254
Sol IV	NGB6715	0.618906	0.517248	0.245768	0.415983	0.148633	0.438684	0.407423	0.427509	0.413471	0.414466	0.53806	0.537676	0.436096	0.411387	0.418749	0.430403	0.400339	0.374703	0.614947	0.10364	0.436271	0.164831	0.0585983	0.464884	0.775236	0.382365	0.779242	0.250386	0.620087	0.339334	0.628981	0.404485	0.555423	0.0578661	0.633186	0.879186	0.358028	0.801893	0.115813	0.684746	0.998875	0.995308	0.166821	1.09014	0.900493	0.779678	0.441808	0.280192
Gyllen II	NGB6716	0.531112	0.465688	0.28742	0.442406	0.282973	0.421783	0.395249	0.407195	0.481906	0.399666	0.441338	0.441479	0.442039	0.382933	0.400798	0.414553	0.389215	0.407954	0.49932	0.182053	0.405717	0.238518	0.130184	0.476078	0.632564	0.424542	0.641034	0.312519	0.585332	0.362345	0.557991	0.419881	0.544036	0.123938	0.654358	0.712357	0.39653	0.968792	0.18241	0.57542	0.851739	0.835832	0.231317	0.900493	1.20383	0.642257	0.395237	0.347576
Skandia II	NGB6717	0.584118	0.52132	0.30603	0.379619	0.170823	0.457985	0.39469	0.4111	0.389711	0.419588	0.549221	0.5491	0.439642	0.403118	0.460369	0.374084	0.374741	0.408183	0.569393	0.13397	0.443494	0.185183	0.0393016	0.447688	1.14953	0.368582	1.20474	0.252883	0.546701	0.308222	0.609947	0.377836	0.551355	0.0700779	0.510961	0.762213	0.318513	0.644221	0.171349	0.642343	0.780024	0.717379	0.196888	0.779678	0.642257	1.08371	0.281248	0.305532
Pärl II	NGB6722	0.352064	0.33154	0.471245	0.424314	0.453407	0.323082	0.331207	0.26622	0.371389	0.338775	0.399615	0.397918	0.373271	0.337797	0.334394	0.351824	0.347755	0.38041	0.34259	0.543376	0.388413	0.465142	0.502535	0.390243	0.295974	0.374942	0.280288	0.652311	0.475078	0.622315	0.380519	0.531761	0.514129	0.709496	0.459818	0.415678	0.631556	0.387485	0.584694	0.380881	0.412746	0.430185	0.751495	0.441808	0.395237	0.281248	1.41262	0.510396
Odin	NGB6723	0.385275	0.428031	0.760463	0.445448	0.467714	0.510685	0.525374	0.40656	0.511992	0.453908	0.368234	0.367587	0.534879	0.447416	0.497052	0.443589	0.521967	0.542018	0.382629	0.57685	0.430814	0.491264	0.511852	0.42503	0.305554	0.569109	0.305622	0.597562	0.317137	0.479867	0.436049	0.459157	0.576223	0.613523	0.307392	0.317079	0.546348	0.331948	0.72556	0.307488	0.332002	0.29115	0.681254	0.280192	0.347576	0.305532	0.510396	1.31691
Robur	NGB6724	0.543635	0.46062	0.351933	0.380097	0.244821	0.360525	0.340817	0.343573	0.387301	0.357575	0.460426	0.459779	0.403361	0.34268	0.395205	0.351719	0.349225	0.367701	0.504491	0.324812	0.422967	0.408584	0.284759	0.447641	0.774798	0.321535	0.801123	0.37887	0.456067	0.399025	0.527979	0.446583	0.452582	0.330502	0.479931	0.597535	0.427171	0.538096	0.346437	0.518625	0.606418	0.564517	0.374601	0.614212	0.562652	0.803396	0.540359	0.388195
Svale	NGB6725	0.554053	0.647222	0.357099	0.477426	0.19826	0.553429	0.494335	0.633628	0.475702	0.516607	0.564844	0.56446	0.517494	0.513003	0.532707	0.455611	0.457844	0.491024	0.563222	0.134888	0.504016	0.23704	0.139734	0.503221	0.808584	0.478729	0.826507	0.25065	0.453094	0.285246	0.542072	0.354598	0.492407	0.0875381	0.438622	0.613991	0.301577	0.533284	0.134195	0.500422	0.585327	0.557079	0.129012	0.626204	0.56598	0.828517	0.264311	0.357389
Ölve	NGB6727	0.569831	0.686106	0.437995	0.482964	0.24581	0.521156	0.486482	0.693781	0.54662	0.525033	0.586399	0.585489	0.498613	0.532983	0.52958	0.528893	0.472047	0.422254	0.601056	0.149353	0.528196	0.218946	0.222731	0.560222	0.540786	0.590871	0.541641	0.246735	0.515872	0.330695	0.544459	0.39217	0.500571	0.115132	0.451512	0.658127	0.306852	0.539347	0.155749	0.457647	0.592703	0.567081	0.174986	0.664038	0.619043	0.542077	0.379866	0.407564
Hankkijan Ilves	NGB6773	0.213239	0.243129	0.568472	0.270523	0.535667	0.272743	0.233343	0.241088	0.305034	0.193648	0.18832	0.189774	0.21449	0.197134	0.1743	0.195932	0.243064	0.29016	0.196413	1.30149	0.276895	0.818112	1.03353	0.280564	0.085205	0.352173	0.0721439	0.723806	0.308683	0.66939	0.218063	0.535512	0.310711	1.06299	0.36458	0.140841	0.624542	0.105559	0.957094	0.154357	0.0412836	0.113075	0.86185	0.044613	0.113836	0.0731042	0.597779	0.581365
Äring	NGB7	0.598435	0.641715	0.447694	0.558042	0.200106	0.658727	0.598058	0.662519	0.592816	0.637922	0.53203	0.531646	0.572116	0.653486	0.611223	0.626815	0.572595	0.501797	0.60209	0.150124	0.526867	0.260941	0.201708	0.549966	0.490881	0.70481	0.489899	0.329691	0.428419	0.341707	0.568337	0.438628	0.489001	0.193362	0.401607	0.538903	0.32259	0.493906	0.212973	0.465771	0.52967	0.488556	0.25978	0.567396	0.539467	0.490596	0.462034	0.470039
Dania	NGB7027	0.545521	0.49874	0.336227	0.398788	0.254322	0.427528	0.438804	0.464666	0.375008	0.457137	0.543184	0.543325	0.468527	0.457472	0.478751	0.422661	0.417542	0.469101	0.532897	0.193837	0.478943	0.283123	0.154309	0.499416	0.606538	0.403768	0.627086	0.365002	0.540926	0.363626	0.49468	0.369436	0.552144	0.210817	0.518052	0.591018	0.355012	0.508999	0.255636	0.484802	0.531896	0.538045	0.248615	0.574349	0.519638	0.625421	0.359758	0.300282
Små II Tystofte	NGB7183	0.589162	0.559186	0.353873	0.34449	0.225493	0.456465	0.385556	0.483625	0.392392	0.415705	0.661657	0.662061	0.389547	0.4079	0.428654	0.40276	0.372171	0.376205	0.586516	0.220148	0.564069	0.335166	0.173531	0.50971	0.702956	0.359185	0.716152	0.321994	0.523388	0.383898	0.559852	0.388657	0.491282	0.238441	0.461128	0.632821	0.344826	0.515092	0.280634	0.547347	0.506744	0.537311	0.24263	0.567576	0.482407	0.714224	0.335393	0.318191
Storaks Abed	NGB7184	0.535472	0.451406	0.233227	0.424448	0.248736	0.396998	0.363899	0.424158	0.410121	0.410328	0.477469	0.477348	0.426181	0.377578	0.42065	0.36036	0.372832	0.425705	0.490814	0.185888	0.393798	0.202967	0.0565607	0.410332	0.70493	0.346718	0.737032	0.314516	0.578664	0.313928	0.498284	0.382755	0.575441	0.0778845	0.92654	0.740086	0.342074	0.67881	0.195173	0.55116	0.761049	0.847806	0.251694	0.894088	0.893467	0.737729	0.397496	0.269489
Kosack	NGB7482	0.454403	0.551774	0.437836	0.900292	0.284511	0.787769	0.976543	0.613538	0.66278	0.990412	0.51377	0.513386	0.954802	1.017	0.971852	0.822288	0.898565	0.936471	0.473288	0.203284	0.470272	0.167849	0.161392	0.455823	0.432711	0.603316	0.432778	0.271521	0.362634	0.264106	0.430082	0.301161	0.414551	0.141493	0.350263	0.368877	0.304855	0.405015	0.291602	0.399723	0.407169	0.352927	0.241783	0.39842	0.392548	0.433213	0.376031	0.474098
Sleipner	NGB7483	0.277705	0.29079	0.224903	0.352844	0.417647	0.287847	0.295709	0.331024	0.287841	0.301964	0.30425	0.304654	0.274493	0.286807	0.362175	0.289806	0.322497	0.365129	0.26298	0.206184	0.292786	0.226939	0.309494	0.306432	0.324543	0.322114	0.309119	0.268644	0.374987	0.297202	0.243669	0.265989	0.286954	0.147019	0.336097	0.300096	0.231347	0.27873	0.203653	0.263723	0.278522	0.284933	0.140705	0.292091	0.291995	0.312443	0.223752	0.171103
Ergo	NGB8	0.582164	0.583696	0.66091	0.496872	0.342691	0.666876	0.543452	0.625242	0.585998	0.563361	0.480312	0.480191	0.526963	0.568422	0.518807	0.578511	0.540045	0.478437	0.609713	0.344698	0.537641	0.461029	0.371338	0.548924	0.392164	0.664646	0.390656	0.432891	0.379853	0.439392	0.613508	0.472246	0.468267	0.454629	0.310242	0.42837	0.458611	0.416457	0.40072	0.398299	0.406533	0.375397	0.482186	0.420628	0.442588	0.391879	0.396401	0.726055
Konge II	NGB8194	0.478584	0.488781	0.327318	0.456046	0.260379	0.496602	0.500263	0.5235	0.460624	0.518072	0.498827	0.499756	0.433623	0.528121	0.488221	0.477819	0.469549	0.403477	0.510071	0.159196	0.492352	0.25032	0.114941	0.512037	0.539076	0.429255	0.557261	0.316182	0.490268	0.336074	0.498637	0.408839	0.502536	0.146243	0.437198	0.539047	0.327985	0.489586	0.238324	0.52158	0.4773	0.533599	0.242332	0.498746	0.433008	0.555858	0.287569	0.290847
Stand Tystofte	NGB8197	0.661246	0.497621	0.24137	0.369048	0.178632	0.379409	0.404601	0.427575	0.363911	0.390113	0.565433	0.564262	0.399664	0.3999	0.425642	0.410251	0.403294	0.355077	0.65965	0.115522	0.49279	0.164897	0.121681	0.492257	0.675	0.374291	0.704213	0.312681	0.550834	0.327585	0.617757	0.331556	0.529757	0.143793	0.485162	0.673922	0.347329	0.565907	0.150801	0.563241	0.628978	0.618323	0.222027	0.6969	0.600966	0.702285	0.323192	0.268704
Lantvete från Värmland	NGB8198	0.29237	0.302304	0.584323	0.233073	0.497692	0.255249	0.273351	0.344638	0.315371	0.252036	0.323642	0.323258	0.240582	0.251058	0.257895	0.301845	0.290687	0.243783	0.26898	0.846818	0.36758	0.902757	0.936474	0.327661	0.127839	0.328114	0.12213	0.663774	0.268607	0.639555	0.259384	0.573157	0.267485	1.10694	0.382533	0.194503	0.685818	0.176551	0.902315	0.22036	0.150348	0.171463	0.822825	0.119543	0.157783	0.12099	0.599452	0.495602
Gammalt svenskt lantvete	NGB8199	0.174128	0.232375	0.573998	0.202004	0.650947	0.202387	0.18793	0.241888	0.295856	0.156638	0.210126	0.210004	0.220016	0.152246	0.158033	0.231653	0.249903	0.252099	0.162029	0.923928	0.333885	0.937856	1.0871	0.322849	0.020362	0.316738	0.0115021	0.851164	0.249879	0.785984	0.213611	0.652368	0.26031	1.57265	0.345687	0.094641	0.793124	0.141281	0.837899	0.155945	0.0856701	0.11335	1.19795	0.0309713	0.138267	0.0114121	0.802071	0.632841
Borg Abed	NGB8933	0.52024	0.478447	0.295191	0.439411	0.231403	0.461587	0.409321	0.47877	0.431648	0.430017	0.52079	0.520669	0.423815	0.429827	0.423536	0.413921	0.376768	0.365311	0.514705	0.164354	0.477555	0.175394	0.125089	0.472033	0.624581	0.380587	0.644341	0.289569	0.514331	0.314713	0.504058	0.348092	0.528438	0.0739429	0.482267	0.626915	0.323954	0.539644	0.22274	0.55247	0.565956	0.643523	0.232524	0.636766	0.550021	0.642413	0.317146	0.244542
Brødtorp pajo	NGB8946	0.324159	0.323066	0.557559	0.209459	0.553375	0.22901	0.204576	0.288991	0.288607	0.214507	0.249877	0.250018	0.219595	0.189109	0.181768	0.276657	0.260247	0.228046	0.298669	0.807188	0.374687	1.03143	0.94752	0.397523	0.154114	0.347825	0.14788	0.626507	0.340307	0.668718	0.340011	0.6635	0.247547	1.1915	0.427975	0.219203	0.628858	0.206765	0.69674	0.260026	0.189226	0.21428	0.811815	0.182841	0.204276	0.147002	0.558246	0.503234
Enger	NGB8957	0.283564	0.255688	0.55635	0.181993	0.574484	0.265611	0.244327	0.287519	0.290286	0.229839	0.261797	0.261412	0.213922	0.220984	0.223095	0.238687	0.271903	0.24758	0.259912	0.776308	0.367439	1.10296	0.999613	0.352727	0.169184	0.330862	0.164	0.574884	0.343824	0.631799	0.303617	0.588771	0.23636	1.01227	0.426503	0.210642	0.5838	0.218421	0.76695	0.278772	0.151782	0.177624	0.653063	0.129117	0.180485	0.16181	0.435467	0.472092
Haukiala Pirola	NGB8968	0.221605	0.270662	0.580514	0.181475	0.595234	0.16059	0.164776	0.296717	0.316026	0.16578	0.169379	0.169783	0.164566	0.153773	0.14932	0.209024	0.174497	0.191923	0.194539	0.933858	0.30863	0.997674	1.80387	0.30626	0.0762415	0.392836	0.0744711	0.583032	0.281864	0.640997	0.242971	0.543879	0.229278	0.996525	0.577227	0.155247	0.550198	0.142021	0.803192	0.191081	0.0942869	0.131681	0.677227	0.0766106	0.125878	0.072543	0.490352	0.47525
Ideal	NGB8973	0.492538	0.495645	0.309763	0.414073	0.21998	0.492176	0.476932	0.540605	0.423639	0.489751	0.540614	0.541542	0.383772	0.493237	0.449136	0.456325	0.450418	0.384347	0.518249	0.169211	0.498953	0.265324	0.089247	0.507873	0.58375	0.41774	0.597997	0.321996	0.529428	0.351341	0.515216	0.428832	0.516228	0.14313	0.433822	0.572694	0.32776	0.51273	0.276697	0.555751	0.504382	0.565145	0.267576	0.532918	0.449325	0.596594	0.306774	0.264365
Trifolium 14	NGB9016	0.50202	0.495675	0.326598	0.405963	0.336067	0.466999	0.428124	0.516216	0.406339	0.43648	0.473426	0.474092	0.369623	0.44968	0.398752	0.401478	0.404498	0.339477	0.482044	0.235146	0.45671	0.238572	0.207434	0.443574	0.568814	0.413043	0.5912	0.342506	0.438609	0.345332	0.490565	0.378186	0.526498	0.172042	0.444618	0.553031	0.329891	0.459458	0.275677	0.491189	0.446121	0.513449	0.278109	0.532686	0.475087	0.589797	0.276609	0.302993
Tystofte Stakket	NGB9017	0.533596	0.521475	0.290693	0.399466	0.176491	0.397748	0.367275	0.440663	0.413496	0.371167	0.502376	0.502779	0.45949	0.38358	0.403546	0.340892	0.347588	0.421204	0.554056	0.186901	0.458878	0.247567	0.074378	0.506658	0.68415	0.390267	0.702597	0.297412	0.556833	0.32203	0.524504	0.401885	0.549409	0.108568	0.563892	0.603512	0.295824	0.525431	0.181481	0.591296	0.595854	0.649791	0.246668	0.597871	0.556026	0.703295	0.329453	0.247133
Varma Tammisto	NGB9020	0.227571	0.239606	0.591468	0.239955	0.505624	0.289964	0.245049	0.267498	0.297047	0.214282	0.278798	0.279989	0.21333	0.211728	0.199398	0.220241	0.25267	0.271146	0.203131	1.17509	0.324311	0.719013	0.914211	0.295158	0.0900843	0.325282	0.0799115	0.859445	0.281003	0.722058	0.228456	0.582666	0.340272	1.15321	0.382326	0.172503	0.714494	0.148774	0.998208	0.176304	0.127822	0.146837	1.0458	0.109096	0.143134	0.0800841	0.718715	0.594384
Nana	NGB9118	0.373344	0.326563	0.171402	0.288577	0.277759	0.267166	0.287369	0.3324	0.272674	0.269468	0.428772	0.429701	0.314204	0.273216	0.34307	0.254685	0.275297	0.298237	0.348641	0.235918	0.367419	0.250371	0.19744	0.365574	0.45773	0.248395	0.463049	0.251115	0.501609	0.336125	0.332218	0.320141	0.326402	0.178328	0.410205	0.430919	0.253991	0.459704	0.156978	0.479882	0.46501	0.474309	0.128427	0.443658	0.427545	0.461121	0.228804	0.168803
Anja	NGB9122	0.338295	0.312519	0.263174	0.296589	0.596918	0.273341	0.277264	0.311004	0.318234	0.270916	0.341996	0.341612	0.299635	0.280966	0.320362	0.312585	0.285147	0.331718	0.352978	0.296181	0.348386	0.295143	0.276346	0.365446	0.398261	0.300782	0.381787	0.280658	0.369671	0.281383	0.359135	0.331567	0.328901	0.222574	0.384082	0.363573	0.281171	0.37923	0.230108	0.418838	0.435737	0.416941	0.231752	0.399943	0.364663	0.382485	0.293794	0.224078
Kraka	NGB9123	0.282543	0.266482	0.25731	0.262893	0.705798	0.234656	0.223875	0.326671	0.295304	0.221466	0.309613	0.310279	0.268302	0.239918	0.248593	0.323789	0.262217	0.272553	0.306153	0.287167	0.316528	0.307134	0.32536	0.35932	0.329906	0.317499	0.306867	0.255627	0.319958	0.276044	0.313098	0.325178	0.294417	0.262136	0.314677	0.326989	0.268481	0.339495	0.22687	0.430304	0.414119	0.387446	0.24952	0.342353	0.287117	0.306252	0.306311	0.182505
[truncated: 26 more columns]
