# Supplementary material for: Genome-Wide Association Analysis of Freezing Tolerance and Winter Hardiness in Winter Wheat of Nordic Origin
Source: Plants (Basel). 2023 Nov 29;12(23):4014. doi: 10.3390/plants12234014 (PMC10708462; doi:10.3390/plants12234014)
Supplement: Supplementary file 1 [file plants-12-04014-s001.zip › Table S6.xlsx]

## Sheet: Supplementary Table 6
Table S6. Genes, associated with significant SNP (single nucleotide polymorphism) markers.
SNP marker	Chromosome	Marker position	Gene	Gene position	Distance from gene to SNP marker (bp)	NCBI Reference Sequence	Gene name	Notes	Nucleotide change (position in NCBI Reference sequence)	Amino acid change (position in NCBI Reference sequence)
LT50
BobWhite_c23903_443	5B	548427978 (+ strand)	TraesCS5B01G559700LC	chr5B:548431777..548432100 (+ strand)	3799	XR_006455939.1	Triticum aestivum uncharacterized LOC123113134	Chr 5B: 100% identity; 100% query cover	non-coding region	non-coding region
BobWhite_c28133_87	2A	102022208 (+ strand)	TraesCS2A01G159600LC	chr2A:102022051..102022605 (- strand)	0	XM_044592251.1	Triticum aestivum uncharacterized LOC123180258	Chr 1D: 98.92% identity; 99% query cover	c.1121C>T	p.A374V
Excalibur_c2598_2052	5A	519951564 (+ strand)	TraesCS5A01G307300	chr5A:519945130..519956066 (+ strand)	0	XM_044526303.1	Triticum aestivum uncharacterized LOC123104451	Chr 5A: 100% identity; 33% query cover	c.1110C>T	p.D370D
Kukri_c14902_1112	2B	206373209 (+ strand)	TraesCS2B01G217700	chr2B:206368652..206376196 (+ strand)	0	XM_044462441.1	Triticum aestivum putative 1-phosphatidylinositol-3-phosphate 5-kinase FAB1C (LOC123039169)	Chr 2B: 100% identity; 64% query cover	c.2800A>G	p.I934V
RAC875_c16644_491	7A	18887907 (+ strand)	TraesCS7A01G050300LC	chr7A:18887367..18892249 (- strand)	0	XM_044589517.1	Triticum aestivum protein FAR1-RELATED SEQUENCE 7-like (LOC123172568)	Chr UN: 94.14% identity; 88% query cover	g.3721T>C (intron)	non-coding region
						XM_044566858.1	Triticum aestivum protein FAR1-RELATED SEQUENCE 5-like (LOC123147596)	Chr 7A: 99.70% identity; 75% query cover	g.2926T>C (intron)	non-coding region
Eidum 2008-2009
Excalibur_c43822_370	3B	648752466 (+ strand)	TraesCS3B01G412500	chr3B:648745943..648749214 (- strand)	3252	XM_044495127.1	Triticum aestivum ethylene-responsive transcription factor ABR1-like (LOC123071550)	Chr 3B: 99.92% identity; 51% query cover	non-coding region	non-coding region
wsnp_Ex_c607_1204908	5B	10438196 (+ strand)	TraesCS5B01G010700	chr5B:10438285..10442125 (- strand)	89	XM_044530545.1	Triticum aestivum CSC1-like protein RXW8 (LOC123110104)	Chr 5B: 100% identity; 52% query cover	non-coding region	non-coding region
Kukri_c57491_156	2B	440825074 (+ strand)	marker seq from T3 BLASTed; TraesCS2B02G308000	chr2B:440814041..440825740 (- strand)	0	XM_044468402.1	Triticum aestivum uncharacterized LOC123045374 (LOC123045374)	Chr 2B: 98.04% identity, 100% query cover	c.423T>C	p.L141L
Tdurum_contig47476_528	UN	51199268 (+ strand)	TraesCSU01G065700	chrUn:51198929..51199633 (- strand)	0	XM_044510706.1	Triticum aestivum uncharacterized LOC123088501 (LOC123088501)	Chr 4A: 100% identity; 100% query cover	c.366C>T	p.D122D
Kukri_rep_c85536_598	UN	2237132 (+ strand)	marker seq from T3 BLASTed; TraesCS7D01G004000	chr7D:2235602..2241133 (- strand)	0	XM_044581511.1	Triticum aestivum lupeol synthase-like (LOC123164098)	Chr 7D: 99.02% identity; 100% query cover	c.1698G>A	p.S566S
RFL_Contig3621_1157	4A	742335140 (+ strand)	TraesCS4A01G494700	chr4A:742333280..742338118 (- strand)	0	XM_044510848.1	Triticum aestivum peroxisomal acyl-coenzyme A oxidase 1-like (LOC123088641)	Chr 4A: 100% identity; 42% query cover	c.1074G>A	p.L358L
Tdurum_contig47476_495	UN	51199301 (+ strand)	TraesCSU01G065700	chrUn:51198929..51199633 (- strand)	0	XM_044510706.1	Triticum aestivum uncharacterized LOC123088501 (LOC123088501)	Chr 4A: 100% identity; 100% query cover	c.333G>A	p.E111E
RAC875_c88279_291	6B	246361273 (+ strand)	TraesCS6B01G317200LC	chr6B:246361162..246362055 (- strand)	0	XM_044556328.1	Triticum aestivum putative F-box protein At2g02030 (LOC123136824)	Chr 6B: 100% identity; 100% query cover	c.1170T>C	p.R390R
						MG979067.1	Triticum aestivum cultivar Guizi 1 anthocyanidin 5,3-O-glucosyltransferase-like protein (5,3GT1)	Chr UN: 95.96% identity; 39% query cover	non-coding region	non-coding region
Eidum 2010-2011
Tdurum_contig50731_961	5B	617710009 (+ strand)	TraesCS5B02G446000	chr5B:617704953..617710181 (+ strand)	0	XM_044534996.1	Triticum aestivum rRNA-processing protein efg1-like (LOC123113692)	Chr 5B: 100.00% identity; 25% query cover	g.1160A>C (intron)	non-coding region
Vollebekk 2008-2009
wsnp_JD_c10233_10936535	3B	424792641 (+ strand)	TraesCS3B01G265400	chr3B:424790470..424792773 (- strand)	0	XM_044493317.1	Triticum aestivum transcription initiation factor TFIID subunit 7-like (LOC123070228)	Chr 3B: 100% identity; 33% query cover	c.78C>A	p.A26A
BobWhite_c18566_106	6B	3883636 (+ strand)	TraesCS6B01G008800LC	chr6B:3883270..3883641 (- strand)	0	XM_044554392.1	Triticum aestivum uncharacterized LOC123135359 (LOC123135359)	Chr 6B: 100% identity; 63% query cover; the beginning of this gene overlaps with the end of TraesCS6B01G008800LC	c.6T>G (TraesCS6B01G008800LC)	p.N2K (TraesCS6B01G008800LC)
